1 **Integrative system biology analysis of barley transcriptome — hormonal signaling against**  
2 **biotic stress**

3 Zahra Soltani, Ali Moghadam\*, Ahmad Tahmasebi, Ali Niazi

4

5 Institute of Biotechnology, Shiraz University, Shiraz, Iran.

6 \*Corresponding author: ali.moghadam@shirazu.ac.ir, Tel/Fax: +987136138128, +987132272805

7

8

9 **Acknowledgments**

10 The authors would like to thank the Institute of Biotechnology for supporting this research and the  
11 Bioinformatics Research Group in the College of Agriculture (Shiraz University).

12

13 **Author Contributions**

14 Zahra Soltani analyzed the data and write the text, Ali Moghadam designed the topic and reviewed  
15 the text, Ahmad Tahmasebi reviewed the text, Ali Niazi reviewed the text.

16

17

18

19

20

21

22

23

24

25

1 **Integrative system biology analysis of barley transcriptome — hormonal signaling against**  
2 **biotic stress**

3  
4 **Abstract**

5 Biotic stresses are environmental factors that cause a variety of crop diseases and damages. In  
6 contrast, crops trigger specific transduction signaling pathways that the hormones are the central  
7 players. Integrative OMICS for systems genetic engineering approach contributes in the  
8 understanding of molecular mechanisms. In this research, the system biology approaches were  
9 applied to discover particular molecular interactions between biotic stresses and hormonal  
10 signaling in barley. The meta-analysis of the data identified a total of 1232 and 304 differentially  
11 expressed genes (DEGs) respectively so that were significantly involved in defense processes and  
12 hormone signaling. A total of 24 TFs belonged to 15 conserved families and 6 TFs belonged to 6  
13 conserved families were identified for biotic and hormonal data respectively, whereas NF-YC,  
14 GNAT, and whirly families were the most abundant groups. The functional analysis of the  
15 upstream regions for over-represented cis-acting elements revealed that were involved activation  
16 of transcription factors in response to pathogens and hormones. Based on the co-expression  
17 analysis, 6 and 7 distinct co-expression modules related to biotic stresses and hormonal signaling  
18 were respectively uncovered. The gene network analysis also identified novel hub genes such as  
19 *TIM10*, *DRT101*, *ADG1*, and *TRA2* which may be involved in regulating defense responses to  
20 biotic stresses. In addition, many new genes with unknown function were obtained. Since this  
21 study represents a first preliminary curated system biology analysis of barley transcriptomic  
22 responses to biotic stresses and hormone treatments, introduces important candidate genes that  
23 may be beneficial to crop biotechnologists to accelerate genetic engineering programs.

24  
25 **Keywords:** *Hordeum vulgare*, Biotic stress, Hormonal signaling, Transcriptome, Meta-analysis,  
26 Co-expression analysis.

27

28

## 1      **Introduction**

2      Cereals are directly related to the food source and energy supply and are constantly faced with  
3 a wide range of biotic stresses that negatively effect on their survival and growth (Sharma *et al.*,  
4 2013). These stresses are caused by living organisms such as bacteria, viruses, fungi, nematodes,  
5 and pests (B. Liu *et al.*, 2014; Rastgoo & Alemzadeh, 2011). Among biotic stresses fungal  
6 pathogens are involved in 70 to 80% of plant diseases (Arabi *et al.*, 2021; Ray *et al.*, 2017). The  
7 cereal barley (*Hordeum vulgare*) is very susceptible to fungal diseases (Massey *et al.*, 2007) like  
8 *Fusarium graminearum* that is a serious trouble in wet or semiwet climates (McMullen *et al.*,  
9 1997; Parry *et al.*, 1995). These pathogens are a major limitation to global crop production; hence,  
10 plant genes encoding resistance to pathogens, are important tools for combating disease  
11 (Chakraborty & Chakraborty, 2021; Milne *et al.*, 2019; J. Wang *et al.*, 2021). Resistance conferred  
12 by these genes is preferable over using commercial fungicides (Singh *et al.*, 2015). In addition to  
13 these pathogens, one of the most important pest on cereals is the bird cherry-oat aphid  
14 (*Rhopalosiphum padi* L.), which reduces plant growth without specific leaf symptoms (Luo *et al.*,  
15 2019). Breeding of barley for *R. padi* resistance has been revealed that there are several resistance  
16 genes, decrease aphid growth. Several gain-of-function and loss-of-function mutants have showed  
17 genes related with fundamental defense and effector-triggered immunity (Jones & Dangl, 2006;  
18 Shen *et al.*, 2007; D. Wang *et al.*, 2006).

19      Access to OMICS information on the behavior of defense genes against pathogens or pests  
20 helps to decipher the gene networks that led to detection of pathogen specific responses (Reymond  
21 *et al.*, 2000). Large-scale data generated from functional genomic studies on the plant-pathogen  
22 interactions have been provided massive information about the expression patterns of key genes  
23 and interactions (Kaul *et al.*, 2000). In recent years, OMICS data and progressive statistical  
24 analyses such as computational systems biology have collected exquisite opportunities to dominate  
25 biological complexity (Bolhassani *et al.*, 2021; Tahmasebi *et al.*, 2019b).

26      Meta-analysis and network analysis are two potent strategies that integrate OMICS data to  
27 recognize core gene sets that regulate the complex traits (Frierson Jr *et al.*, 2002; Sharifi *et al.*,  
28 2018). These approaches provide a robust statistical framework for re-evaluating key findings,  
29 improving sensitivity by increasing sample size, testing new hypotheses, (Z. Liu *et al.*, 2013; Rung  
30 & Brazma, 2013) and characterizing of novel gene candidates in plant breeding programs (Ashrafi-

1 Dehkordi *et al.*, 2018; Shaar-Moshe *et al.*, 2015; Tseng *et al.*, 2012). Therefore, progress in whole-  
2 genome transcriptome analysis techniques have analyzed gene regulation and plant-pathogen  
3 interactions in various conditions, allowing identification of stress-specific biomolecular networks  
4 and hormonal signaling pathways. For example, the main response to pathogens may be due to the  
5 cross-talks among hormone-related pathways (Pieterse *et al.*, 2009) such as ethylene (ET),  
6 jasmonic acid (JA), salicylic acid (SA) and abscisic acid (ABA), and/or signaling due to calcium  
7 (Dodd *et al.*, 2010; Schulz *et al.*, 2013), activated oxygen species (ROS) (Torres *et al.*, 2006), and  
8 phosphorylation chains (Asai *et al.*, 2002). Transcription factors transmit these signaling  
9 indications and activate or suppress the expression of genes involved in immune responses and  
10 metabolic processes. Thus, most plant immune responses are transcriptionally controlled (Tao *et*  
11 *al.*, 2003; Wise *et al.*, 2007).

12 In the other words, plants are equipped with an array of defense strategies to protect themselves  
13 against pathogens, one of which is the ability to prime defense (Dey *et al.*, 2014). Depending on  
14 the location of the initial infection and the virulence of the attacker, this type of induced resistance  
15 is often referred to as induced systemic resistance (ISR) or systemic acquired resistance (SAR).  
16 ISR is caused on the colonization of plant roots by nonpathogenic soil microbes and protects aerial  
17 tissues of dicots and monocots from necrotrophic pathogens and pests (Balmer *et al.*, 2013;  
18 Pieterse *et al.*, 2012; Walters *et al.*, 2013). On the other hand, SAR is induced in systemic and  
19 uninfected tissues of a plant on prior foliar pathogen challenge and is mainly beneficial against  
20 biotrophic pathogens (Fu & Dong, 2013; Vlot *et al.*, 2009). Many hormonal cross-talks are  
21 involved in both defense systems for example, induction of SAR is more through SA while ISR  
22 requires JA and ET signaling pathways (Van Loon *et al.*, 1998). These accumulating signaling  
23 molecules moderate the defense responses and when used exogenously, are enough to induce the  
24 resistance (Ryals *et al.*, 1996). The protection mediated by ISR is mainly less than that obtained  
25 by SAR (Van Loon, 2000) and a degree of dependence on plant genotype is observed in the  
26 production of ISR (Bloemberg & Lugtenberg, 2001). However, ISR and SAR together present a  
27 better protection than each of them alone, and this shows that they can act increasingly in inducing  
28 resistance to pathogens (Van Wees *et al.*, 2000).

29 In this study, in order to identifying the hub genes and gene networks and providing further  
30 insight into the mechanisms involved in the response of the barley to various pathogens and

1 hormonal signal transductions, meta-analysis and co-expression network analysis were applied on  
2 barley transcriptome data in response to pathogens and hormones. These genes were identified  
3 through functional enrichment analysis of metabolite pathways, transcription factors (TFs), protein  
4 kinases (PKs), and microRNA families. A more accurate knowledge of barley-pathogen  
5 interactions might be helpful for plant biotechnologists to produce the pathogen-tolerant cultivars.

6

## 7 **Methods**

### 8 **Data collection**

9 In this study, the raw microarray expression data of barley exposed to diverse biotic stresses  
10 including fungi, bacteria, viruses, insects, and hormones including JA, gibberellic acid (GA),  
11 methyl jasmonic acid (mJA) were extracted from publically available databases of Gene  
12 Expression Omnibus (<http://www.ncbi.nlm.nih.gov/geo>) and Array Express  
13 (<http://www.ebi.ac.uk/arrayexpress>). The data selection was done based on the “Minimal  
14 Information about a Microarray Experiment” (MIAME) requirements. Therefore, the studies with  
15 relatively similar genetic background without any mutated or transgenic samples, with suitable  
16 quality and biological and technical replicates of controls and treatments were chosen (Cohen &  
17 Leach, 2019). In addition, the six most critical elements contributing towards MIAME including  
18 raw data, normalized data, sample annotations, experimental design, array annotations, and data  
19 protocols were considered (Brazma *et al.*, 2001). The total of 10 studies including 479 biotic stress  
20 samples (**Table S1**) and 4 studies including 46 hormonal treatment samples (**Table S1**) were  
21 selected for the data analysis. The raw data of all the studies were downloaded in two platforms,  
22 Affymetrix (Accession: GPL1340) and Agilent (Accessions: GPL14904 and GPL15513). The  
23 probe-gene maps and probe-annotation files were downloaded from the Affymetrix site  
24 (<http://www.Affymetrix.com>).

25

### 26 **Pre-processing and normalization**

27 Low quality data is responsible for the differences between tests, which may be due to lack of  
28 standards as well as inadequate testing methods, statistical analysis, validation, and/or reporting of  
29 the studies (Dupuy & Simon, 2007; Jafari & Azuaje, 2006; Shi *et al.*, 2006). Therefore, the

1 normalization of the Affymetrix microarray raw expression data for each array was performed  
2 with robust multichip average (RMA) algorithm (Irizarry *et al.*, 2003) using the Expression  
3 Console software (V. 1.3.1). After background correction, RMA performs a quantile normalization  
4 were carried out and then uses median polish as summarization method (Durinck, 2008). Agilent  
5 microarray data (two colors) were processed using Flex Array software (V. 1.6.3). At the first, we  
6 performed the background correction using normexp algorithm and MLE method to estimate the  
7 intensity of expression of raw microarray data (Ritchie *et al.*, 2007; Silver *et al.*, 2009). Finally,  
8 the normalization between arrays was performed using the quantile method (Bolstad, 2001) to  
9 reduce the variance and probe set differences between arrays. In addition, Agilent microarray data  
10 (one color) were processed in the R program using the package LIMMA and LOESS method  
11 (Smyth, 2005).

12

### 13 **Meta-analysis and identification of DEGs**

14 In this study, the controls and treatments for each study were separately defined, and  
15 guardianship data in the form of Uniprot IDs as input files for meta-analysis were integrated using  
16 R package metaDE. The merged datasets were filtered again with the exception of 20% of the  
17 expressionless genes (with low expression intensity) and 20% of the non-educational genes (genes  
18 with quantitative changes). Finally, the results based on Rank Prod method, which is a non-  
19 parametric method were used. In this method, genes were ranked according to their up- and down-  
20 regulation, fold change (FC), and FDR. In this way, the Rank Prod algorithm calculates pairwise  
21 FC with replicates for each gene between treatment and control samples in both directions,  
22 respectively, and converts FC into rank among all genes, then searches for genes that are  
23 continuously top ranked across replicates (Hong & Breitling, 2008). Therefore, up- and down-  
24 regulated genes obtained with FC cutoff of  $\log_2 FC > 1$  or  $\log_2 FC < -1$  and  $FDR < 0.05$  were only  
25 considered for the meta-analysis (Balan *et al.*, 2017).

26

### 27 **Functional annotation and enrichment analyses**

28 The DEGs selected by the meta-analysis were further analyzed and characterized. Gene  
29 ontology (GO) enrichment analysis of the DEGs to find important pathways was conducted using

1 the Kyoto Encyclopedia of Genes and Genomes (KEGG) pathway and DAVID  
2 (<http://david.abcc.ncifcrf.gov/>) platforms (Du *et al.*, 2010). GO enrichment was performed on the  
3 hypergeometric statistics followed by a FDR < 0.05 correction for multiple comparisons mapped  
4 to each category (Shaar-Moshe *et al.*, 2015). GO study was performed on the unique list of TAIR  
5 IDs of the genes obtained in non-redundant stress data. The data sets were log transformed and  
6 significant genes were selected according to  $P\text{-value} < 0.05$ . Where data for multiple time points  
7 were available, the first time point representing the maximum genomic response was selected.  
8 Values obtained from databases were an averaged value for each gene that represented the overall  
9 transcript change across time points.

10

### 11 **Identification of TFs, PKs and miRNAs families**

12 The iTAK database (<http://itak.feilab.net/cgi-bin/itak/index.cgi>) was used to identify the  
13 transcription factors (TF) and protein kinase (PK) families of the barley DEGs. In the next step,  
14 the psRNATarget database (<http://plantgrn.noble.org/psRNATarget>) was used to identify possible  
15 miRNAs among DEGs. Then, to further demonstrate the response to biotic stresses and hormones,  
16 all of stress-responsive miRNAs were collected and compared with the enriched GO identifier to  
17 annotate all genes. WEGO software (<http://wego.genomics.org.cn/>) was used for plotting GO  
18 annotation results

19

### 20 **Identification of modules**

21 In order to network analysis, R package WGCNA (Weighted Gene Co-expression Network  
22 Analysis) was conducted on the matrix of normalized expression values of DEGs for all samples  
23 to identify groups of DEGs with similar expression patterns. For this purpose, the meta-analysis  
24 output file was merged with the initial normalized data and then the treatment and control samples  
25 were separated in the columns. Thus, WGCNA file was prepared based on the meta-analysis  
26 expression values. A resemblance matrix was calculated based on Pearson correlations between  
27 each DEG pair and converted into an adjacency matrix by applying a power function. Then  
28 followed by, the topological overlap matrix (TOM) (Yip & Horvath, 2007) was calculated for  
29 hierarchical clustering analysis. Finally, a dynamic tree cut algorithm was used to identify gene

1 co-expression modules. This method can detect nested clusters and have been shown to better  
2 detect outliers (Langfelder *et al.*, 2008). Finally, the modules were defined with a minimum  
3 module size of 30 genes and a threshold of 0.3 and a minimum module size of 100 genes and a  
4 threshold of 0.99 for biotic and hormonal data respectively.

5

## 6 **Identification of hub genes**

7 Network visualization and calculation of topological properties for each module were  
8 performed using the Cytoscape software (V. 3.6.1). Hub genes were also screened using plug-in  
9 of Cytoscape, CytoHubba (Chin *et al.*, 2014). To identifying the hub genes (30 nodes with the  
10 highest interaction) in the network, computational algorithms of Maximal Clique Centrality  
11 (MCC) were used as the most effective method (Li *et al.*, 2020). Then all hub genes were studied  
12 for enrichment analysis in terms of Molecular Function (MF), Biological Process (BP), and  
13 Cellular Component (CC) by DAVID (<http://david.abcc.ncifcrf.gov/>) database.

14

## 15 **Protein-protein interactions**

16 Annotation and analysis of individual data were accomplished using Network Analyzer (Xia  
17 *et al.*, 2014), a web-based tool for protein-protein interaction network analysis and visual  
18 exploration. The list of biotic stress and hormonal related genes was determined. The unique list  
19 of homologous TAIR IDs of each data groups was BLASTed against the STRING interactome  
20 database with default parameters (minimum required interaction score = 0.150). The low  
21 confidence was selected to make simpler network and to study the important and key  
22 connectivity's. Finally, the network was drawn by Cytoscape software.

23

## 24 **Cis-elements analysis**

25 In order to obtain the genomic sequences, 1000 bp from the upstream flanking region of DEGs,  
26 the genes were used to the BLASTX search against the Ensemble Plants  
27 (<http://plants.ensembl.org>). Then, the MEME ([meme.nbcr.net/meme/intro.html](http://meme.nbcr.net/meme/intro.html)) (Bailey *et al.*,  
28 2009) database was used to identify the conserved cis-acting elements. The motifs were counted



1 and the abundance of regulatory elements in the promoter region of various genes was investigated.  
2 In the next step, we used Tomtom v 5.0.1 tool (<http://meme-suite.org/tools/tomtom>) (Gupta et al.,  
3 2007) to obliterate redundancy motifs and determine known CRE based on the motif database of  
4 JASPAR CORE 2018 plants (Khan et al., 2017) with threshold *E-value* cut-off of 0.05. GMO tool  
5 (<http://meme-suite.org/tools/gomo>) was also used to identify the biological roles of the cis-acting  
6 elements (Buske et al., 2010).

7

## 8 **Results**

9 In this study, in order to identify key genes in response to pathogens and interaction with various  
10 hormones, we analyzed some microarray data of barley by system biology approaches. Meta-  
11 analysis approach integrated DEGs from microarray datasets which were expressed consistently  
12 with statistical significance. A schematic workflow, summarizing major steps of this study is  
13 shown in **Fig. 1**. In addition, co-expression network analysis was performed to identify correlated  
14 DEGs, so that genes with unique functions were integrated in common modules.

15

16 **Fig. 1** Schematic overview of the integrative strategy for understanding aspects of response of  
17 barley to biotic stresses and hormonal treatments.

18

## 19 **Pre-processing and normalization**

20 The purpose of pre-processing microarray gene expression data is to select a small set of genes  
21 which can be used to improve the attention and performance of classification from a high  
22 dimensional gene expression dataset (Hu *et al.*, 2006). Pre-processing is used to detect data noise  
23 and reduce the impact of existing noise on the device learning algorithm. Raw microarray data  
24 pre-processing involves image processing, quality assessment, background correction,  
25 normalization, summarization, and then high-level analysis such as gene selection, classification,  
26 or clustering (Freudenberg, 2005). Reducing heterogeneity among studies is a necessary step for  
27 direct combination of expression data in differential expression meta-analysis. To reduce the any  
28 systematic differences for meta-analysis, an integrative approach of within-study RMA and

1 LOESS normalization were developed and then the samples were aggregated to remove duplicates.  
2 Fig. S1 compares the heterogeneity among samples of different studies after different  
3 normalization steps. The proposed framework of normalization and standardization reduced the  
4 batch effects and noises, and facilitated direct merging of samples from different experiments (**Fig.**  
5 **S1**).

## 7 **Meta-analysis and identification of DEGs**

8 In this study, Rank Prod method was used to analyze microarray data and identify DEGs for  
9 biotic stress and hormonal treatment studies (**Table S1**). Although the Fisher's combined  
10 probability test adds the transformed logarithm *P-values* obtained from individual studies, under  
11 the null hypothesis, and follows a chi-squared distribution with 2 k degrees of freedom, where k  
12 is the number of studies being combined (Rhodes *et al.*, 2002), the Rank Prod, calculates the  
13 product of the rank of pair-wise differences between each biological sample in one group versus  
14 another group during the studies (Breitling & Herzyk, 2005) and calculates the product of the ranks  
15 of FC in each inter-group pair of samples (Hong *et al.*, 2006). Therefore, in the Rank Prod method  
16 could only be accomplishment with up- and down-regulation analysis separately. Because  
17 theoretically, it is easy to modify the algorithm to analyze up- and down-regulation simultaneously  
18 (Tseng *et al.*, 2012).

19 Based on the results, the meta-analysis was able to find 1232 genes, which were significant  
20 differentially expressed (adjusted *P-value* and FDR < 0.05). Among the biotic data, 546 up-  
21 regulated genes and 642 down-regulated genes were identified, and 177 up- and 127 down-  
22 regulated genes were identified for hormonal data (**Table S2**). Finally, we created a list of up- and  
23 down-regulated genes and compared to identify common and specific genes. Venn diagrams  
24 showed the numbers of specific and common regulated genes between the two types of biotic  
25 stresses and hormonal treatment studies (**Fig. 2-3**).

26  
27 **Fig. 2** Venn diagrams of DEGs inferred from biotic and hormonal studies. a) Up- and down-  
28 regulated biotic DEGs. b) Up- and down-regulated hormonal DEGs. c) Total DEGs of biotic and  
29 hormonal studies.

1

2 A total of 61 common DEGs between biotic and hormonal data were identified in which 18  
3 DEGs such as *EMB1144*, *PAL1*, *GAD*, *ALDH7B4*, *JAZ1*, *NINJA* and some genes with unknown  
4 function including *AT1G22410*, *AT1G06550*, *AT5G58950*, and *AT1G68300* were identified. In  
5 addition, a total of 12 DEGs that were significantly down-regulated including *MT3*, *SIR*, *ABCA2*,  
6 *GAMMA-VPE*, *APE1* as well as some genes with unknown function including *AT1G22410*,  
7 *AT3G15810*, *AT2G21180* and *AT4G09890* were identified.

8

9 **Fig. 3** Venn diagrams of DEGs inferred from biotic and hormonal studies. d) Comparison of up-  
10 and down-regulated DEGs in both biotic hormonal studies.

11

## 12 **Enrichment analysis and functional annotation of DEGs**

13 The 1232 and 308 DEGs related to biotic and hormonal studies respectively were subjected to  
14 GO and gene network analysis to explore other possible functions. The results of the GO in the  
15 DAVID database were divided into three different categories, BP, CC, and MF. The results of the  
16 biotic stress studies showed the highest percentage of DEGs involved in BP (**Fig. 4a**).

17

18 **Fig. 4** (a) Gene-ontology analysis of biotic DEGs. GO enrichment analysis of DEGs was retrieved  
19 using DAVID and the results were plotted using R software. The most significantly ( $P < 0.05$ )  
20 enriched GO terms in Biological Process (BP), Molecular Function (MF) and Cellular Component  
21 (CC) branches related to defense response are presented. The horizontal axis shows the number of  
22 genes based on the p-value, while the vertical axis represents Go-term include categories of MF,  
23 CC, and BP, respectively. (b) KEGG pathway analysis of biotic DEGs. Y-axis shows the pathways  
24 associated with biotic stress studies and the X-axis shows the amount of DEGs enriched in the  
25 pathway. The colors of each bubble are determined based on the *P-value* of the identified  
26 pathways. Y-axis label represents pathway, and X-axis label represents rich factor (rich factor =  
27 amount of differentially expressed genes enriched in the pathway/amount of all genes in  
28 background gene set). Size (group) and color (based on p-value) of the bubble represent amount

1 of differentially expressed genes enriched in the pathway and enrichment significance,  
2 respectively. The Fig. was drawn using R language.

3

4 These DEGs were related to processes of oxidation-reduction process (8.4% genes), translation  
5 (6.4% genes), response to cadmium ion (3.9% genes), embryo development ending in seed  
6 dormancy (3.5% genes), protein folding (2.8% genes), and system of transport (2.8% genes). The  
7 most important mechanisms were related to response to ABA (2.6% genes), photosynthesis (2.5%  
8 genes), defense response to bacterium (2.4% genes), cytokinin (1.9% genes) and ET (0.9% genes),  
9 cellular response to oxidative stress (0.8% genes), JA biosynthetic process (0.7% genes), hydrogen  
10 peroxide catabolic process (0.7% genes), response to reactive oxygen species (0.4% genes). In the  
11 category of CC the top enriched GO terms included chloroplast, cytoplasm, integral component of  
12 membrane, and cytosol. In the category of MF, chlorophyll and protein binding, metal ion binding,  
13 structural constituent of ribosome were dominant. The KEGG pathway analysis for DEGs revealed  
14 a significant enrichment in pathways associated with biosynthesis of secondary metabolites,  
15 ribosome, metabolic pathways, and biosynthesis of antibiotics and amino acids (**Fig. 4b**). In  
16 addition, for hormonal studies in the most percentage of DEGs (**Fig. 5a**) involved in BP. The  
17 pathways of oxidation-reduction process (15% genes), defense response (5.5% genes) and  
18 responses to oxidative stress (3.2% genes) were the top enriched GO terms. In the category of MF,  
19 metal ion binding and oxidoreductase activity were dominant. In addition, the category of CC and  
20 KEGG pathway analysis were the same as the components of biotic DEGs (**Fig. 5b**).

21

22 **Fig. 5** (a) Gene-ontology analysis of hormonal DEGs. GO enrichment analysis of DEGs was  
23 retrieved using DAVID and the results were plotted using R software. The most significantly ( $P$ -  
24  $value < 0.05$ ) enriched GO terms in biological process (BP), molecular function (MF) and cellular  
25 component (CC) branches related to signaling pathways are presented. The horizontal axis shows  
26 the number of genes based on the  $P$ -value, while the vertical axis represents Go-term include  
27 categories of MF, CC, and BP, respectively. (b) KEGG pathway analysis of hormonal DEGs. Y-  
28 axis shows pathways associated with hormonal stress and the X-axis shows the amount of DEGs  
29 enriched in the pathway. The colors of each bubble are determined based on the  $P$ -value of the  
30 identified pathway. Y-axis label represents pathway, and X-axis label represents rich factor (rich

1 factor = amount of differentially expressed genes enriched in the pathway/amount of all genes in  
2 background gene set). Size (group) and color (based on *P-value*) of the bubble represent amount  
3 of differentially expressed genes enriched in the pathway and enrichment significance,  
4 respectively. The Fig. was drawn using R language.

5

## 6 **Co-expression analysis and module identification**

7 In order to identify the different co-expressed modules, the R package WGCNA was applied  
8 on the 1232 biotic DEGs and 308 hormonal DEGs. Firstly, the network topology analysis was  
9 performed and appropriate power value was determined because the power value directly affected  
10 the average degree of connectivity and the independence within co-expression modules. When  
11 the power value was 10, the scale independence was up to 0.3 and 0.99 for biotic and hormonal  
12 data respectively that these were selected to produce a hierarchical clustering tree. Finally, the  
13 DEGs based on the dynamic tree cutting algorithm were grouped into 6 modules for biotic data  
14 ranged in size from 81 to 431 genes per module (**Fig. S2a, Table 1**) and 7 modules for hormonal  
15 data ranged in size from 141 to 926 genes per module (**Fig. S2b, Table 2**). In this way, WGCNA  
16 assigned a unique color label to each module that was used as specific module identifier in the  
17 analyses.

18

19 **Table 1.** Modules of biotic stress studies.

| Module name | Number genes | Module        | Number genes |
|-------------|--------------|---------------|--------------|
| Blue        | 296          | Blue.csv      | 3858         |
| Brown       | 229          | Brown.csv     | 732          |
| Green       | 81           | Green.csv     | 42           |
| Red         | 68           | Red.csv       | 78           |
| Turquoise   | 431          | Turquoise.csv | 9746         |
| Yellow      | 124          | Yellow.csv    | 2705         |

20

21

22

1 **Table 2.** Modules of hormonal treatment studies.

| Module name | Number genes | Module        | Number genes |
|-------------|--------------|---------------|--------------|
| Blue        | 926          | Blue.csv      | 9181         |
| Brown       | 305          | Brown.csv     | 557          |
| Green       | 206          | Green.csv     | 505          |
| Red         | 142          | Red.csv       | 21           |
| Turquoise   | 947          | Turquoise.csv | 8303         |
| Yellow      | 221          | Yellow.csv    | 394          |
| Black       | 141          | Black.csv     | 82           |

2

3 In the following, the hierarchical clustering of the TOM of DEGs related to both groups of the  
4 DEGs was illustrated (**Fig. S3**). As a result, an undirected weighted network with scale-free  
5 topology composed of modules of barley DEGs with correlated expression during pathogen  
6 infections was obtained. Finally, to understanding the biological functions associated with  
7 modules, the enrichment analysis for BP category was conducted (**Table S3**). The most  
8 significantly BP in Turquoise module were enriched in oxidation-reduction process and  
9 photosynthesis. The Blue module was associated with intracellular protein transport, Brown  
10 module with response to cadmium ion, Yellow module with translation, Green module with protein  
11 ubiquitination and Red module with response to stress. GO results related to hormonal modules  
12 (**Table S3**) Showed that the most important BP term enriched in Turquoise, Blue and Brown  
13 modules was oxidation-reduction process. In addition, a total of 600 common genes (17.1%) were  
14 identified between biotic stress and hormonal modules, which Turquoise (195 genes), Blue (169  
15 genes), and Brown (117 genes) involved the most common genes.

16

17 **Hub genes**

18 The network of the co-expressed modules was constructed to identify the genes with high  
19 connectivity or hub genes within each module. Because in biological network, each node  
20 represents a gene, which is linked to a different number of genes and is more important for its  
21 interaction with a large number of genes. A total of top 30 hub genes were chosen for each module.  
22 In the final, significant enrichment was performed for 177 hub genes from biotic modules and 198  
23 hub genes from hormonal modules, and we were able to found functions that respond to biotic

1 stress and hormones. The hub genes related to biotic modules were strongly enriched in  
2 photosynthesis, translation, and ribosome biogenesis pathways (**Fig. 6a**).

3

4 **Fig. 6** Distribution of GO enrichment of Biological Processes (BP) for hub genes in the two type  
5 of biotic stresses and Hormonal studies: (a) Biotic hub genes. (b) Hormonal hub genes.

6

7 In addition, among the hormonal modules, the top enriched BP terms were associated with  
8 oxidation-reduction process, response to cadmium ion, and ubiquitin-dependent protein catabolic  
9 process (**Fig. 6b**). In addition, a total of 10 common hub genes (2.7%) such as *NF-YC2*, *SSI2*,  
10 *ARAC1* and *PFD1* were identified between biotic stress and hormonal data (**Fig. S4**). In addition,  
11 some hub genes with unknown function including *AT3G26670*, *AT1G67620*, *AT1G05720*,  
12 *AT1G52600*, *AT5G59140* and *AT3G22290* were identified that may be considered potential  
13 candidates to be studied further.

14

## 15 **Identification of transcription factors**

16 Because of the importance of transcription factors (TFs) as a powerful tool for the manipulation  
17 of complex network pathways, these genes were noticed. TFs are key players in stresses through  
18 transcriptional regulation. To identify transcription factors, DEG nucleotide sequences were used  
19 to the BLASTX search against the iTAK database. A total of 24 TF genes for biotic DEGs were  
20 found, which were belonged to 15 diverse TF families and directly or indirectly were involved in  
21 hormonal signaling and response to biotic and abiotic stresses (**Table S5, Fig. 7A**).

22 Members of the AUX/IAA, GNAT, NF-YC and whirly families were the top classes. Among  
23 these transcription factor families, only 5 families were significantly up-regulated including bZIP  
24 and GNAT, while the most family members were down-regulated. These transcription factor  
25 families were more involved in oxidation-reduction process, response to wounding, defense  
26 response to bacterium, response to karrikin, response to ABA, JA mediated signaling pathways,  
27 and arginine biosynthetic process. In addition, among these transcription factors the Whirly  
28 (Turquoise module), GNAT, and NF-YC families (Green module) were also the hub genes (**Table**

1 **S5)**. In addition, a total of 6 TF genes related to hormonal DEGs belonged to 6 diverse TF families  
2 were identified (**Table S5, Fig. 7B**).

3

4 **Fig. 7** Distribution of TF families identified in DEGs. (a) The number of up- and down-regulated  
5 biotic TF families. (b) The number of up- and down-regulated hormonal TF families. The y axis  
6 refers to the number of genes. The x axis shown TF families.

7

8 Among these transcription factor families only one family of GNAT was significantly up-  
9 regulated, while other families were down-regulated. These transcription factor families were more  
10 involved in response to oxidative stress, response to wounding, defense response to bacterium,  
11 response to ABA, JA mediated signaling pathways and defense responses. Brown module was  
12 enriched for Tify and OFP TF families whereas the Turquoise, Red and Black modules contained  
13 at least one member of GNAT and MBF1 families. Among the identified TF families of biotic  
14 stress and hormonal treatment studies, there was only one common gene. The significantly up-  
15 regulated *TIFY10A* (AT1G19180) was involved in response to JA, defense responses to bacterium,  
16 and regulation of defense responses.

17

## 18 **Identification of PKs**

19 PKs are important signaling regulators in response to environmental stresses (Ho, 2015). To  
20 identify PKs, DEG nucleotide sequences were used to the BLASTX search against the iTAK  
21 database. Three PKs were identified among the biotic DEGs classified into RLK (Receptor-Like  
22 Kinase)-Pelle and TKL families (**Table 3**) that were totally up-regulated.

23

24

25

26

27



1 **Table 3.** PKs for biotic stress and hormonal treatment studies.

| Family             | Count | Accession                     | Up/Down | Module    | Treatment |
|--------------------|-------|-------------------------------|---------|-----------|-----------|
|                    | 1     | Contig11835_at<br>(AT5G58950) | Up      | Turquoise | Biotic    |
| TKL-Pl-4           | 1     | Contig11835_at<br>(AT5G58950) | Up      | Red       | Hormonal  |
|                    | 1     | Contig18153_at<br>(AT4G35780) | Down    | Turquoise | Hormonal  |
| RLK-Pelle_LRR-XI-1 | 1     | Contig15860_at<br>(AT1G34420) | Up      | Blue      | Biotic    |
| RLK-Pelle_SD-2b    | 1     | Contig18914_at<br>(AT4G32300) | Up      | Turquoise | Biotic    |
| RLK-Pelle_SD-2b    | 1     | Contig22773_at<br>(AT5G60900) | Up      | Black     | Hormonal  |

2

3 The RLK-Pelle was the largest group among these families which was commonly identified in  
 4 Turquoise and Blue modules. In addition, TKL-Pl-4 were identified in Turquoise module. Among  
 5 hormonal DEGs, three PKs were identified, which were classified into RLK-Pelle and TKL  
 6 families (**Table 3**). The RLK-Pelle were also identified in Black module only one of the TKLs is  
 7 down-regulated and the rest of the PKs are up-regulated. Among identified PKs of biotic and  
 8 hormonal DEGs, there was only one common gene. The significantly up-regulated *TKL-Pl-4*  
 9 (*AT5G58950*) was the largest group among these families which was belonged to Red and  
 10 Turquoise modules.

11

## 12 **Identification of miRNAs**

13 To predict potential miRNAs that target the DEGs, psRNA Target tool was used. A total of 432  
 14 miRNAs belonged to 56 conserved families were found among the biotic DEGs (**Table S6**). In  
 15 addition, a total of 85 miRNAs belonged to 32 conserved families were found among hormonal  
 16 DEGs (**Table S6**). Among the identified miRNAs of both datasets, there were a total of 15 common  
 17 target genes, which the miR6192 family comprised the highest frequency (**Fig. 8a**).

18

1 **Fig. 8** (a) Common miRNAs between biotic stress and hormonal studies. The y axis refers to the  
 2 number of miRNAs. The x axis shown miRNA families. (b) Gene ontology analysis of miRNAs  
 3 target genes. Categorization of miRNAs target genes with WEGO  
 4 (<http://wego.genomics.org.cn/cgi-bin/wego/index.pl>) in biotic stresses and hormonal treatment  
 5 studies. Notes: the horizontal axis is the GO classification; the ordinate is the percentage of gene  
 6 number (left) and number of genes (right). This Fig. shows the gene enrichment of the secondary  
 7 functions of GO in the background of the target gene and all genes of the differential expression  
 8 miRNAs, reflecting the status of each secondary function in the two contexts. According to WEGO  
 9 analysis, miRNAs can generally be divided into three categories: the cellular component,  
 10 molecular function and biological process. All target: Demo1, De miRNA target: Demo2

11

12 All the putative target genes were categorized through GO analysis. The results showed that  
 13 these genes were involved in different MFs, i.e., binding, oxidoreductase, transferase, and enzyme  
 14 regulator activities, and played roles in many BPs, i.e., metabolic, cellular, and biosynthetic  
 15 processes (**Fig. 8b**).

16

### 17 **Cis-acting elements**

18 The 1000 bp upstream flanking region of DEGs was used to predict conserved consensus cis-  
 19 regulatory elements (CREs). By MEME analysis, 11 significant motifs were identified with  
 20 lengths ranging from 11 to 50 aa (**Tables 4 and 5**).

21

22 **Table. 4** The conserved cis-acting elements found in promoter of biotic DEGs by the MEME  
 23 analysis.

| Motif name | Motif Logo                                                                          | E-value  | Width | Best match in JASPAR and PLACE | Significant GO term identified by GOMO |
|------------|-------------------------------------------------------------------------------------|----------|-------|--------------------------------|----------------------------------------|
| Motif 1    | 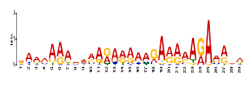 | 7.2e-083 | 29    | MA1267.1                       | CC: chloroplast                        |
| Motif 2    |  | 8.3e-035 | 15    | MA1267.1                       |                                        |

|          |                                                                                     |          |    |          |                                                                                                                                                                                                 |
|----------|-------------------------------------------------------------------------------------|----------|----|----------|-------------------------------------------------------------------------------------------------------------------------------------------------------------------------------------------------|
| Motif 3  | 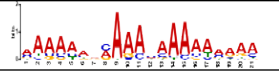   | 8.6e-031 | 21 | MA1267.1 | CC: plasma membrane<br>MF: transcription factor activity                                                                                                                                        |
| Motif 4  |    | 1.5e-013 | 29 | MA1403.1 | MF: transcription factor activity<br>BP: regulation of transcription<br>CC: endomembrane system<br>CC: plasma membrane                                                                          |
| Motif 5  |    | 2.5e-006 | 48 | MA0657.1 | MF: transcription factor activity<br>CC: nucleus<br>CC: plasma membrane<br>MF: protein binding<br>BP: regulation of transcription, DNA-dependent                                                |
| Motif 6  |    | 1.0e-004 | 41 | MA1267.1 | MF: transcription factor activity<br>CC: nucleus<br>CC: plasma membrane<br>MF: protein binding<br>MF: protein serine/threonine kinase activity                                                  |
| Motif 7  |    | 2.9e-002 | 29 | MA0014.3 | MF: transcription factor activity<br>CC: nucleus<br>CC: plasma membrane<br>BP: regulation of transcription, DNA-dependent<br>MF: protein binding                                                |
| Motif 8  |   | 2.1e-001 | 11 | MA1268.1 |                                                                                                                                                                                                 |
| Motif 9  |  | 3.8e-002 | 39 | MA1327.1 |                                                                                                                                                                                                 |
| Motif 10 |  | 1.4e+000 | 29 | MA1354.1 | MF: transcription factor activity<br>CC: plasma membrane                                                                                                                                        |
| Motif 11 |  | 1.3e+001 | 15 | MA1267.1 | CC: plasma membrane<br>CC: nucleus<br>BP: transmembrane receptor protein tyrosine kinase signaling pathway<br>MF: transcription factor activity<br>MF: protein serine/threonine kinase activity |

1

2 **Table. 5** The conserved cis-acting elements found in promoter of hormonal DEGs by the MEME  
3 analysis.

| Motif name | Motif Logo                                                                          | E-value  | Width | Best match in JASPAR and PLACE | Significant GO term identified by GOMO                                                                                   |
|------------|-------------------------------------------------------------------------------------|----------|-------|--------------------------------|--------------------------------------------------------------------------------------------------------------------------|
| Motif 1    | 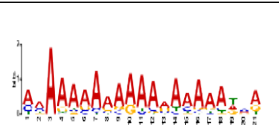 | 5.7e-101 | 21    | MA1267.1                       | MF:transcription factor activity<br>CC: nucleus<br>CC: plasma membrane<br>BP: regulation of transcription, DNA-dependent |

|          |                                                                                     |          |    |          |                                                                                                                                                                           |
|----------|-------------------------------------------------------------------------------------|----------|----|----------|---------------------------------------------------------------------------------------------------------------------------------------------------------------------------|
| Motif 2  | 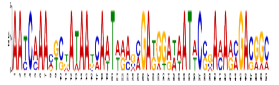   | 1.6e-074 | 50 | MA0150.2 | MF: transcription factor activity<br>CC: nucleus<br>CC: plasma membrane                                                                                                   |
| Motif 3  |    | 8.2e-071 | 50 | MA0072.1 | MF: transcription factor activity<br>CC: nucleus<br>CC: plasma membrane<br>BP: regulation of transcription, DNA-dependent<br>MF: protein serine/threonine kinase activity |
| Motif 4  |    | 3.0e-069 | 50 | MA1268.1 | CC: chloroplast<br>BP: regulation of transcription<br>MF: transcription factor activity                                                                                   |
| Motif 5  |    | 2.1e-068 | 50 | MA1277.1 | CC: chloroplast                                                                                                                                                           |
| Motif 6  |    | 6.4e-058 | 50 | MA1260.1 |                                                                                                                                                                           |
| Motif 7  |   | 9.0e-058 | 21 | MA1267.1 |                                                                                                                                                                           |
| Motif 8  |  | 3.1e-054 | 50 | MA0777.1 |                                                                                                                                                                           |
| Motif 9  |  | 4.5e-054 | 50 | MA0680.1 | MF: transcription factor activity                                                                                                                                         |
| Motif 10 |  | 1.2e-053 | 50 | MA0578.1 |                                                                                                                                                                           |
| Motif 11 |  | 9.0e-053 | 50 | MA0415.1 |                                                                                                                                                                           |

1

2 After filtering ( $P$ -value < 0.05) motifs of 1 and 4 for biotic DEGs and motifs of 1 and 7 for  
3 hormonal DEGs showed the highest frequency. Moreover, the most of motifs are known as CREs  
4 which have related to C2H2 zinc finger factors (**Table S7**). The GOMO analysis for the motifs  
5 found by MEME detected many interesting BFs (**Tables 4 and 5, and Table S8**). GO on biotic  
6 DEGs indicated that these motifs were involved in regulation of transcription, DNA-dependent  
7 and signaling pathway. Based on the results, it seems that the WRKY transcription factor families  
8 were the main transcription factors because in the promoter, 85% of the DEGs and the hub genes,  
9 involved at least one WRKY binding site. Moreover, these motifs were involved in MFs, including  
10 transcription factor activity and protein serine/threonine kinase activity (**Table 4**). GO term  
11 analysis of hormonal DEGs showed the motifs involved in regulation of transcription (**Table 5**).  
12 The main transcription factor families included WRKY, MYB, BHLH, and bZIP. Finally, this  
13 analysis also identified the motifs related to SA pathway (GO: 0009751) (**Table S9**).

14

## 1 Protein-protein interactions and selection of key genes

2 It is important to find genes that are regulated for any type of biotic stresses. We selected 1232  
3 biotic DEGs and 308 hormonal DEGs. The DEGs also represent commonly responses to stresses  
4 and may be useful in describing general responses to stress in barley and Arabidopsis. For this  
5 purpose, the analysis of protein-protein interactions (PPIs) using the STRING database and  
6 Cytoscape was performed (**Fig. 9a and b**).

7

8 **Fig. 9** The protein-protein interaction network using STRING database and cytoscape. (a) Network  
9 of interactions among biotic hub genes and DEGs .Light colored nodes represent the most  
10 connected genes in the network. (b) Network of interactions among hormonal hub genes and DEGs.

11

12 The network was plotted for 265 key biotic DEGs that were involved in the most important  
13 mechanisms response to biotic stress and 61 hormonal key DEGs that were related to the hormonal  
14 signaling pathways (**Table 6**).

15

16 **Table 6.** The most important molecular mechanisms related to biotic and hormonal studies.

| Selective mechanisms related to hormonal data |                                    | Selective mechanisms related to biotic data |                                     |
|-----------------------------------------------|------------------------------------|---------------------------------------------|-------------------------------------|
| Number of genes                               | Meaningful mechanism               | Number of genes                             | Meaningful mechanism                |
| 15                                            | Jasmonic acid biosynthetic process | 104                                         | Oxidation-reduction process         |
| 5                                             | Response to fungus                 | 9                                           | Hydrogen peroxide catabolic process |
| 17                                            | Defense response                   | 12                                          | Response to ethylene                |
| 3                                             | Auxin                              | 6                                           | Response to reactive oxygen species |
| 6                                             | Response to karrikin               | 11                                          | Oxidative stress                    |
| 9                                             | Defense response to bacterium      | 43                                          | Response to bacterium               |
| 2                                             | Salicylic acid catabolic process   | 24                                          | Response to cytokinin               |
| 4                                             | Response to nematode               | 40                                          | Photosynthesis                      |
|                                               |                                    | 16                                          | Jasmonic acid biosynthetic process  |

17

1 **Fig. 10** The protein-protein interaction network using STRING database and cytoscape. Interaction  
2 network of common genes between hormonal and biotic studies.

3

4 A list of genes that showed the most association in the protein interaction networks was then  
5 prepared (**Table S10**). Finally, among up-regulated hub genes related to biotic stress and hormonal  
6 signaling, it is worthy to notice some of the major genes that may play a key role in fungal response.  
7 Therefore, 3 key genes related to biotic stress data including *DNA-DAMAGE-*  
8 *REPAIR/TOLERATION 101 (DRT101)*, active in the DNA repair pathway, *TRANSLOCASE OF*  
9 *THE INNER MEMBRANE 10 (TIM10)*, active in protein import into the mitochondrial inner  
10 membrane, and *ADP GLUCOSE PYROPHOSPHORYLASE 1 (ADGI)*, active in the starch  
11 biosynthetic process, were identified. Among the key hormonal DEGs, the *Aldolase-type TIM*  
12 *barrel family protein (TRA2)*, active in the response to cadmium ion pathway, was identified.  
13 Finally, a PPI network was developed to study key genes that are commonly expressed among  
14 biotic and hormonal DEGs. There were a total of 63 common DEGs such as *PAL*, *NINJA*, *JAZ1*,  
15 *APE1*, *RPL24* and some others significant genes especially with unknown function (**Fig. 10**).

16

## 17 **Discussion**

18 Cereals are continuously subjected to biotic stresses, which causes changes in plant metabolism  
19 involving physiological damages that leading to a reduction of their productivity. Therefore,  
20 understanding plant defense mechanisms prevents significant crop and economic losses (B. Liu *et*  
21 *al.*, 2014; Sharma *et al.*, 2013). To fight biotic stresses in barley, the plant has developed complex  
22 defense mechanisms which can interact with each other, through the activation of TFs, PKs,  
23 microRNAs, and other critical signaling regulators. In addition, the plant defense against  
24 pathogens are the result of a series of consecutively changes at the cellular level mainly related to  
25 hormone-dependent signal pathways. Resistance induced in plants often appears as an increase in  
26 the expression of plant defense genes against stresses and increases plant defense capacity.

27 In spite of many researches, there has not been sufficient clearance of defense molecular  
28 mechanisms for example how are the hormonal signaling cross-talking against various pathogens  
29 or what are the main common and specific gene networks. Therefore, one of the most efficient and

1 commonly methods of extracting biological information is the use of transcriptome, which has  
2 created a significant ability in researchers to obtain huge amount of data. According to the goal of  
3 researchers in using the microarray technique, which actually is to identify different expression  
4 genes and function of genes in cell activity, the normalization method that ensures the reliability  
5 of this data is also of great importance (Stafford, 2008). In this study, using two different  
6 microarray platforms, Affimetrix and Agilent, different within array and between array  
7 normalization methods, were compared in order to eliminate or reduce batch effects. It is clear that  
8 comparing different process normalization strategies is difficult because their performance  
9 depends on a wide range of parameters such as experimental design, data collection process, and  
10 image processing software (Y.-J. Chen et al., 2003). Studies by Wu et al. (2005) and Wang et al.  
11 (2011) have pointed out that in most transcriptome data with significant genome biological  
12 changes, methods such as Quantile do not work well due to hard assumptions (Dong Wang et al.,  
13 2011; W. Wu et al., 2005). But our results showed that methods such as Quantile work well for  
14 plant transcriptome data normalization (**Fig. S1**).

15 To identify the DEGs and key pathways, the integration of transcriptomic data received from  
16 various biotic stresses and hormonal treatments studies in barley was applied by meta-analysis.  
17 Using this approach, a set of components responsible for biotic tolerance and hormone signaling  
18 was identified that allow us to understand which genes play a key role in various biotic stresses  
19 and hormonal cross-talking. In this way, we collected 479 microarray samples from different biotic  
20 stress studies and 46 microarray samples from hormonal treatment studies available in public  
21 databases (**Table S1**). In total, the meta-analysis identified 1232 and 304 DEGs for biotic and  
22 hormonal studies respectively (**Fig.2 a-b, Table S2**). Of these common DEGs between biotic and  
23 hormones studies, 1.2% were categorized as up-regulated and 0.8% as down-regulated (**Fig.3**).  
24 These observations showed that under biotic stresses and hormones, a wide range of BPs were up-  
25 regulated.

26 The functional enrichment analysis suggested that DEGs were enriched on various BPs (**Fig.**  
27 **4-5**). The terms photosynthesis, response to cadmium ion, protein folding, oxidation-reduction  
28 process, response to cytokinin, defense response to bacterium, defense response to fungus, cellular  
29 response to oxidative stress, response to ABA, JA mediated signaling pathway, response to  
30 reactive oxygen species, response to wounding, and response to biotic stresses and hormones were

1 also found to be significant. Carbohydrate metabolism has been mostly shown as an essential  
2 pathway affected by biotic stress responses in plants (Martinelli *et al.*, 2012). Growing tissues may  
3 be seen as a complex of source sinks of carbohydrate attracting photosynthesis produced by leaves.  
4 Because the correct mechanism causes the allocation of carbon during stresses consequently to  
5 improves plant performance in stress environments (Falchi *et al.*, 2020). The sources disruption  
6 has been linked with the early pathogenic mechanisms of diseases in plants (Punelli *et al.*, 2016).  
7 In fact, the dysregulation of this pathway at transcriptomic level may be associated with a general  
8 plant stress state. This altered transcript condition may be seen by manufacturers as a sort of “alarm  
9 bell” to help further monitoring actions and the initiate of management procedures. In addition,  
10 sugar alcohols are directly linked with stress responses. Although their role in tolerance to stress  
11 has been more connected with abiotic stresses than biotic ones, it has been hypothesized that they  
12 may play an essential role also in a beneficial modulation of biotic stress responses (Balan *et al.*,  
13 2018).

14 It is very essentially to study the plant hormonal responses to pathogens because the signaling  
15 pathways of various hormones regulate biotic stress responses antagonistically (Balan *et al.*, 2018).  
16 It is observed that several genes (such as WRKY families) involved in auxin, ET, JA, and SA were  
17 usually affected in all types of pathogens. Fungal pathogens up-regulate ET, benzyl-adenine (BA),  
18 and SA while mostly repress JA-related genes. For example, *Erwinia amylovora* up-regulates ET  
19 and GA signaling genes while viruses affect some essential genes involved in ET and auxin  
20 signaling (Balan *et al.*, 2018). Our results in this study confirmed that the hormone-related  
21 pathways and therefore their crosstalk was deeply affected by all barley pathogens.

22 To present information regarding how genes regulate in barley against pathogens attack and  
23 hormone treatments, we identified TFs as regulatory molecules that play an essential role in gene  
24 transcription. Transcription factors not only act as a molecular activator for the expression of  
25 stress-inducible genes, but also play a major role in signal transduction pathways in biological  
26 networks and promote plant adaptation to various environmental conditions (Tahmasebi *et al.*,  
27 2019a). There were 24 TFs for biotic studies belonged to 25 TF families and 6 TFs for hormonal  
28 studies belonged to 6 TF families (**Table S5**). The major members of TF families such as GNAT,  
29 NF-YC, and Whirly were the top classes and were also considered as hub genes (**Fig. 7**). In this  
30 analysis WHIRLY was up-regulated. Plants have a small family of single-stranded DNA-binding



1 proteins called WHIRLY, which are also involved in implicated in defense gene regulation  
2 (Desveaux et al., 2004; Vickers, 2017). In the barley, WHIRLY binds to the promoter of the HvS40  
3 senescence-related gene, which is produced during defense against pathogens, during senescence  
4 and also hormones such as SA, JA, and ABA, which are synthesized in plastids (Krupinska *et al.*,  
5 2014; Lin *et al.*, 2020). Transgenic barley with suppressed WHIRLY1 levels remained almost  
6 green phenotype despite having higher SA levels than the wild-type (Krupinska et al., 2002). One  
7 out of one NF-Y was down-regulated. In plants, NF-Y subunits are encoded by multigene families  
8 whereas members show structural and functional diversity. It has been shown that an increasing  
9 number of NF-Y genes that play the major roles in the various stages of root node coexistence and  
10 arbuscular mycorrhizae as well as in the interaction of plants with pathogenic microorganisms  
11 (Hanemian *et al.*, 2016). Barley NF-Ys comprise a relatively diverse gene family involved in  
12 various processes such as starch metabolism, sucrose metabolism, and photosynthesis. There is  
13 less evidence about the role of NF-Y in defending against pathogenic attacks. Overexpression of  
14 rice *NF-YA (OsHAP2E)* causes resistance to *Magnaporthe oryzae* and *Xanthomonas oryzae* (Alam  
15 et al., 2015). In general, the signaling pathways including the *NF-YAs* can regulate beneficially  
16 pathogenic plant and microbial interactions and indicate the existence of common mechanisms  
17 between both types of biological interactions. These findings corroborate contrast action between  
18 regulators that allow plants to create a complex network of interacting pathways in encounter with  
19 various stresses and hormonal signaling.

20 PKs have evolved as the largest family of molecular switches that regulate protein activities  
21 related to almost all basic cellular functions. Only a fraction of plant PKs, however, have been  
22 functionally characterized even in model plant species. To investigate signal transduction  
23 mechanisms in this study, we identified potential PKs that play key roles in signaling networks  
24 and plant responses to various biotic stresses and hormones. We detected 3 PKs among the biotic  
25 DEGs and 3 PKs among the hormonal DEGs that are classified into RLK-Pelle and TKL groups  
26 (**Table 3**). RLK/Pelles play important roles from growth regulation to defense response, and the  
27 dramatic expansion of this family has been considered very important for plant-specific  
28 adaptations (Ye *et al.*, 2017). We realized that hundreds of *RLK/Pelles* are up-regulated by biotic  
29 stresses. In addition, the rate of stress responsiveness is related with the degree of consecutive  
30 duplication in RLK/Pelle subfamilies (Lehti-Shiu et al., 2009). Members of this family are  
31 involved in many different plant processes including regulation of meristem proliferation,

1 reproduction, hormonal signal transduction, and response to biotic and abiotic stresses (Acharya  
2 et al., 2007; Florentino et al., 2006; Miya et al., 2007; Zipfel et al., 2006). Accordingly, these  
3 results suggest that PKs play a central role in signal transduction during plant growth and  
4 development and also in plant responses to biotic stresses. This suggests that there is a positive  
5 and negative cross-talk among PKs.

6 Plants have evolved complex mechanisms to afford with a diversity understanding small RNA-  
7 guided stress regulatory networks that can provide new insights for the genetic improving plant  
8 stress tolerance. MicroRNAs (miRNAs) are a major class of small non-coding RNAs that have  
9 recently emerged as important regulators of gene expression, during or after transcription (Djami-  
10 Tchatchou *et al.*, 2017). Some of miRNAs have been related to biotic stress responses, and the  
11 play important roles in plants infected by pathogenic bacteria, viruses, nematodes, and fungi  
12 (Anjali & Sabu, 2020). Barley is one of the most important agricultural crops that has been  
13 considered for miRNA studies (Djami-Tchatchou et al., 2017). In the present study, 432 miRNAs  
14 belong to 56 miRNA families for biotic studies and 85 miRNAs belong to 32 miRNA families for  
15 hormonal studies and also 15 common miRNAs for both studies were predicted (**Table S6**), a high  
16 proportion of which are involved in the different BPs (**Fig. 8b**). The major members of the  
17 miRNAs for the both studies belong to conserved families including miR6192, miR6180, and  
18 miR6214, miR6196, miR6184, miR166, and miR156. We detected 100 miRNAs for the first time.  
19 Many microRNAs (miR156, miR159, etc.) had orthologs in wheat or rice that were recognized to  
20 be expressed, while up to a number of microRNAs (miR444) were appeared to be specifically  
21 expressed in barley. A combination of small RNA and mRNA degradome analyses to recognition  
22 and characterization of many conserved miRNAs (miR156, miR166, etc.) and novel miRNAs  
23 (hvu-miR1120b) together with a number of miRNA target genes were done. The results showed  
24 that some miRNAs are involved in different functions including carbohydrate translocation, cell  
25 differentiation, defense response, photosynthesis, and phytohormone signaling pathways (Shuzuo  
26 et al., 2012). This finding revealed that miRNAs play a significant role in regulating early growth  
27 and development of the barley and also in the signaling pathways of different hormones that  
28 regulate biotic stress responses (Curaba et al., 2012).

29 Analysis of promoter region of genomic sequences is mainly based on the identification of  
30 regions of the genome that are capable of transcription factors binding. The study of these regions

1 and their transcription factors and downstream genes that are regulated by these proteins (target  
2 genes) is a fascinating topic in the field of post genomics and can provide new insights into vital  
3 BPs (Lemon & Tjian, 2000; Sandelin et al., 2004). We performed a promoter analysis to identify  
4 cis-acting elements located in upstream of DEGs according to whether these are under common  
5 regulatory control. Eleven with significant scores were identified (**Table S8**). Many cis-regulatory  
6 elements are related with cross-talking to pathogens and hormones. Many motifs, which was found  
7 out of DEG promoters, are highly matched to the MA1267.1 motif (**Table S7, Tables 4 and 5**)  
8 that is one of cis-acting elements of C2H2 zinc finger factors (DOF5.8). DOF TFs are zinc-finger  
9 regulators distributed among non-vascular and vascular plants. DOF proteins play an important  
10 role in many BPs as, e.g., flowering time, seed development, and responses to hormones and  
11 stresses (Ruta *et al.*, 2020). In addition, He et al. realized the Arabidopsis DOF5.8 to be an  
12 upstream regulator of a gene encoding an NAC family member in response to stress (Klees *et al.*,  
13 2021). More particular, DOF5.8 was shown to play a major role in the correct development of  
14 veins in the leaves of *Arabidopsis thaliana* and its promoter was demonstrated to be regulated by  
15 auxin (Konishi *et al.*, 2015). Actually, the overexpression of this TF leading to a modification in  
16 the expression of many genes was involved in auxin biosynthesis, vascular tissue formation,  
17 secondary cell wall deposition and as well as signaling during physiological processes (Guerriero  
18 *et al.*, 2020; Konishi & Yanagisawa, 2015).

19 Then, co-expression network analysis of the DEGs was performed to discover processes and  
20 functions that are involved in response to pathogens and hormonal signaling. We recognized 6  
21 significant modules in biotic studies and 7 significant modules in hormonal studies as principal  
22 functional clusters (**Fig. S2**). Enrichment analysis of modules in both studies showed a wide range  
23 of BPs related with signaling, photosynthesis, defense response to bacterium or fungus and  
24 response to JA (**Table S3**). Interestingly, for both studies, 4 modules including Brown, Blue,  
25 Turquoise, and Yellow were significantly related with response to stresses. After studying of the  
26 genes within these modules, finally three genes (*ADG1*, *TIM10*, and *DRT101*) related to biotic  
27 studies and one gene (*TRA2*) related to hormonal studies that were involved in the regulation of  
28 BPs to further investigation were identified (**Table S10, Fig. 9**).

29 Starch biosynthesis plays a central role in plant metabolism, so starch is an important  
30 determinant of the growth and development of non-aerial organs (Kishore, 1994). Several

1 enzymatic stages are involved in starch biosynthesis in plants. ADP-glucose pyrophosphorylase  
2 (ATP: alpha-glucose-1-phosphate adenylyl transferase, ADGase) has been studied as a major  
3 regulatory enzyme in the starch biosynthetic pathway in plants (Crevillén et al., 2005; S. M. Wang  
4 et al., 1998b; Zeeman et al., 2007). There are 6 genes encoding proteins with homology to ADP-  
5 GlcPPase, 2 of these genes encode small subunits (APS1: ADG1 and APS2). Surprisingly, *ADG1*  
6 can be expressed and identified not only in chloroplast but also in non-plastidic regions, especially  
7 small proportion in nucleus (Bahaji et al., 2011). Genetic elements and molecular mechanisms  
8 leading the flowering process in *Arabidopsis thaliana* flowering plants and short-day flowering  
9 rice have been investigated (Cho et al., 2017). Mutants of *Arabidopsis thaliana* starch metabolism  
10 with *ADG1* (AT5G48300) showed higher sugar concentrations the leaves and exhibit late  
11 flowering phenotypes (Caspar et al., 1991; Eimert et al., 1995; Lin et al., 1988). In addition,  
12 penetration resistance indicates the first level of plant defense against phytopathogenic fungi.  
13 Therefore, it has been reported that the starch-deficient *Arabidopsis thaliana ADG1* mutant has  
14 impaired penetration resistance against the hemibiotrophic fungus *Colletotrichum higginsianum*  
15 (Engelsdorf et al., 2017). The protein interaction network for the *ADG1* was drawn using STRING  
16 software in which 11 genes with 54 interactions participated in this network (**Fig S5a**). The results  
17 showed that 9 genes involved the highest interaction with other genes. One of the most important  
18 genes in this network is the *STARCH SYNTHASE 1 (SSI)*, which, if presents in the plant is broken  
19 down the Cys bridge between *ADG1* and activates the ADP-glucose pyrophosphorylase, which is  
20 responsible for starch synthesis. Plants have evolved a set of antioxidant defense systems to defend  
21 themselves against a host of stress reactions (Yang et al., 2018). The *DRT101* (DNA-damage-  
22 repair/tolerance protein) encoding important enzymes responsible for antioxidant defense was  
23 identified. This gene was strongly expressed in auxin synthesis, cell division, and antioxidant  
24 defense (Bian et al., 2019). Studies showed that DRT proteins (Fujimori et al. 2014) are assigned  
25 with defensive functions for scavenging the UV-B-induced DNA damage against sunlight and  
26 pathogens. The studies have been reported that the *DRT101* is nuclear-encoded but chloroplast-  
27 targeted (Bian *et al.*, 2019). The protein interaction network for *DRT101* in which 11 genes with  
28 33 interactions participated was showed (**Fig. 9b**). One of the most important genes in this network  
29 is the transcription factor of GNAT that we identified in the both biotic stress and hormonal  
30 pathways. TIM10 is a small protein from the TIM chaperone complex (**Fig. S5c**) that facilitates  
31 the transfer of hydrophobic proteins into the inner mitochondrial membrane and aids to protein

1 folding. The assembly of TIM10 also depends on oxidative stress in mitochondria and messaging  
2 molecules. TIM10 is loaded with  $Zn^{2+}$  in the cytosol. The role of  $Zn^{2+}$  is to keep the protein in the  
3 reduced and unfolded form in the cytosol, before entering into the mitochondria (Herrmann &  
4 Neupert, 2000). In Arabidopsis, there are two genes encoding TRA (*TRA2*, *TRAI*). TRA2 (**Fig.**  
5 **S5d**) that is involved to maintain ROS balance in response to Glc during early seedling growth  
6 and sheds light on the relationship between Glc, the pentose phosphate pathway and ROS. In  
7 general, TRA activity is related to plant defense mechanisms, which include the synthesis of  
8 secondary metabolites and is one of the fastest responses to pathogenic attacks in plants, as well  
9 as to programmed cell death and wounding of injured tissues (Zheng *et al.*, 2020).

10

## 11 **Conclusion**

12 In this study, we integrated a meta-analysis method with the gene co-expression network  
13 analysis on microarray studies to identify the DEGs involved in biotic stresses, hormonal  
14 treatments, and some cross-talking in barley. This type of approach increases sensitivity in the  
15 identification of important stress response genes that may be missed by studies that are limited to  
16 specific tissue or growth stage or level of stress. Most of the DEGs were involved in pathways of  
17 photosynthesis, response to cadmium ion, protein folding, oxidation-reduction process, defense  
18 response to bacterium, defense response to fungus, cellular response to oxidative stress, JA  
19 mediated signaling pathway, and response to reactive oxygen species. In addition, using DEGs,  
20 various analyzes including analysis of promoter, identification of PKs and transcription factors  
21 were performed. These analyses extend the role of TFs (e.g., WRKY, MYB, BHLH, and bZIP),  
22 kinases (RLK/Pelle), miRNAs (e.g., miR6192) which are key to the pathogen response, while a  
23 number of novel genes with unknown functions were also identified. Results help us for more deep  
24 insight on molecular mechanisms against different pathogens and on hormonal cross-talks.  
25 Weighted gene co-expression network analysis divided genes into individual and consensus  
26 modules and showed sets of genes with conserved and reversed expression status. A number of  
27 genes with high connectivity and conserved expression but with weak annotation were recognized.  
28 We suggest these DEGs, which might provide a more robust bio-signature for phenotypic traits,  
29 as a more promising resource of molecular biomarkers and potential candidate genes for  
30 engineering pathogen tolerance in barley.

1  
2  
3  
4  
5  
6  
7  
8  
9  
10  
11  
12  
13  
14  
15  
16  
17  
18  
19  
20  
21  
22  
23  
24  
25  
26  
27  
28  
29  
30  
31  
32  
33  
34  
35  
36  
37  
38  
39  
40

## Declarations

The authors declare that there is no conflict of interest.

## References

- Alam, M. M., Tanaka, T., Nakamura, H., Ichikawa, H., Kobayashi, K., Yaeno, T., Yamaoka, N., Shimomoto, K., Takayama, K., & Nishina, H. 2015. Overexpression of a rice heme activator protein gene (Os HAP 2E) confers resistance to pathogens, salinity and drought, and increases photosynthesis and tiller number. *Plant Biotechnology Journal*, 13(1), 85-96.
- Anjali, N. N., & Sabu, K. K. (2020). Role of miRNAs in Abiotic and Biotic Stress Management in Crop Plants. In *Sustainable Agriculture in the Era of Climate Change* (pp. 513-532): Springer.
- Arabi, M. I. E., Al-Daoude, A., Jawhar, M., & Shoaib, E. A.-S. A. 2021. Early events involved in barley response to phytopathogenic fungi with different lifestyles. *MYCOPATH*, 18(1).
- Asai, T., Tena, G., Plotnikova, J., Willmann, M. R., Chiu, W.-L., Gomez-Gomez, L., Boller, T., Ausubel, F. M., & Sheen, J. 2002. MAP kinase signalling cascade in Arabidopsis innate immunity. *Nature*, 415(6875), 977-983.
- Ashrafi-Dehkordi, E., Alemzadeh, A., Tanaka, N., & Razi, H. 2018. Meta-analysis of transcriptomic responses to biotic and abiotic stress in tomato. *PeerJ*, 6, e4631.
- Balan, B., Caruso, T., & Martinelli, F. 2017. Gaining insight into exclusive and common transcriptomic features linked with biotic stress responses in Malus. *Frontiers in Plant Science*, 8, 1569.
- Balan, B., Marra, F. P., Caruso, T., & Martinelli, F. 2018. Transcriptomic responses to biotic stresses in Malus x domestica: a meta-analysis study. *Scientific reports*, 8(1), 1-12.
- Balmer, D., Planchamp, C., & Mauch-Mani, B. 2013. On the move: induced resistance in monocots. *Journal of experimental botany*, 64(5), 1249-1261.
- Bian, X., Qu, C., Zhang, M., Li, D., Jiang, J., & Liu, G. 2019. Transcriptome analysis provides new insights into leaf shape variation in birch. *Trees*, 33(5), 1265-1281.
- Bloemberg, G. V., & Lugtenberg, B. J. 2001. Molecular basis of plant growth promotion and biocontrol by rhizobacteria. *Current opinion in plant biology*, 4(4), 343-350.
- Bolhassani, M., Niazi, A., Tahmasebi, A., & Moghadam, A. 2021. Identification of key genes associated with secondary metabolites biosynthesis by system network analysis in Valeriana officinalis. *Journal of plant research*, 134(3), 625-639.
- Bolstad, B. 2001. Probe level quantile normalization of high density oligonucleotide array data. *Unpublished manuscript*.
- Brazma, A., Hingamp, P., Quackenbush, J., Sherlock, G., Spellman, P., Stoeckert, C., Aach, J., Ansorge, W., Ball, C. A., & Causton, H. C. 2001. Minimum information about a microarray experiment (MIAME)—toward standards for microarray data. *Nature genetics*, 29(4), 365-371.

- 1 Breitling, R., & Herzyk, P. 2005. Rank-based methods as a non-parametric alternative of the T-  
2 statistic for the analysis of biological microarray data. *Journal of bioinformatics and*  
3 *computational biology*, 3(05), 1171-1189.
- 4 Chakraborty, B., & Chakraborty, U. 2021. Molecular detection of fungal pathogens and induction  
5 of phytoimmunity using bioinoculants. *Indian Phytopathology*, 1-16.
- 6 Chin, C.-H., Chen, S.-H., Wu, H.-H., Ho, C.-W., Ko, M.-T., & Lin, C.-Y. 2014. cytoHubba:  
7 identifying hub objects and sub-networks from complex interactome. *BMC systems*  
8 *biology*, 8(S4), S11.
- 9 Cohen, S. P., & Leach, J. E. 2019. Abiotic and biotic stresses induce a core transcriptome response  
10 in rice. *Scientific reports*, 9(1), 1-11.
- 11 Dey, S., Wenig, M., Langen, G., Sharma, S., Kugler, K. G., Knappe, C., Hause, B., Bichlmeier,  
12 M., Babaeizad, V., Imani, J., Janzik, I., Stempf, T., Hückelhoven, R., Kogel, K.-H., Mayer,  
13 K. F. X., & Vlot, A. C. 2014. Bacteria-Triggered Systemic Immunity in Barley Is  
14 Associated with WRKY and ETHYLENE RESPONSIVE FACTORS But Not with  
15 Salicylic Acid. *Plant Physiology*, 166(4), 2133-2151.
- 16 Djami-Tchatchou, A. T., Sanan-Mishra, N., Ntushelo, K., & Dubery, I. A. 2017. Functional roles  
17 of microRNAs in agronomically important plants—potential as targets for crop  
18 improvement and protection. *Frontiers in Plant Science*, 8, 378.
- 19 Dodd, A. N., Kudla, J., & Sanders, D. 2010. The language of calcium signaling. *Annual review of*  
20 *plant biology*, 61, 593-620.
- 21 Du, Z., Zhou, X., Ling, Y., Zhang, Z., & Su, Z. 2010. agriGO: a GO analysis toolkit for the  
22 agricultural community. *Nucleic acids research*, 38(suppl\_2), W64-W70.
- 23 Dupuy, A., & Simon, R. M. 2007. Critical review of published microarray studies for cancer  
24 outcome and guidelines on statistical analysis and reporting. *Journal of the National*  
25 *Cancer Institute*, 99(2), 147-157.
- 26 Durinck, S. (2008). Pre-processing of microarray data and analysis of differential expression. In  
27 *Bioinformatics* (pp. 89-110): Springer.
- 28 Falchi, R., Bonghi, C., Drincovich, M. F., Famiani, F., Lara, M. V., Walker, R. P., & Vizzotto, G.  
29 2020. Sugar metabolism in stone fruit: source-sink relationships and environmental and  
30 agronomical effects. *Frontiers in Plant Science*, 11, 1820.
- 31 Freudenberg, J. M. 2005. Comparison of background correction and normalization procedures for  
32 high-density oligonucleotide microarrays. *Institut für Informatik*, 120(11).
- 33 Frierson Jr, H. F., El-Naggar, A. K., Welsh, J. B., Sapinoso, L. M., Su, A. I., Cheng, J., Saku, T.,  
34 Moskaluk, C. A., & Hampton, G. M. 2002. Large scale molecular analysis identifies genes  
35 with altered expression in salivary adenoid cystic carcinoma. *The American journal of*  
36 *pathology*, 161(4), 1315-1323.
- 37 Fu, Z. Q., & Dong, X. 2013. Systemic acquired resistance: turning local infection into global  
38 defense. *Annual review of plant biology*, 64, 839-863.
- 39 Guerriero, G., Piasecki, E., Berni, R., Xu, X., Legay, S., & Hausman, J.-F. 2020. Identification of  
40 Callose Synthases in Stinging Nettle and Analysis of Their Expression in Different Tissues.  
41 *International journal of molecular sciences*, 21(11), 3853.
- 42 Hanemian, M., Barlet, X., Sorin, C., Yadeta, K. A., Keller, H., Favery, B., Simon, R., Thomma,  
43 B. P., Hartmann, C., & Crespi, M. 2016. Arabidopsis CLAVATA 1 and CLAVATA 2  
44 receptors contribute to *Ralstonia solanacearum* pathogenicity through a miR169-dependent  
45 pathway. *New Phytologist*, 211(2), 502-515.

- 1 Ho, H. L. 2015. Functional roles of plant protein kinases in signal transduction pathways during  
2 abiotic and biotic stress. *J Biodivers Bioprospect Dev*, 2, 147.
- 3 Hong, F., & Breitling, R. 2008. A comparison of meta-analysis methods for detecting differentially  
4 expressed genes in microarray experiments. *Bioinformatics*, 24(3), 374-382.
- 5 Hong, F., Breitling, R., McEntee, C. W., Wittner, B. S., Nemhauser, J. L., & Chory, J. 2006.  
6 RankProd: a bioconductor package for detecting differentially expressed genes in meta-  
7 analysis. *Bioinformatics*, 22(22), 2825-2827.
- 8 Hu, H., Li, J., Wang, H., & Daggard, G. (2006). *Combined gene selection methods for microarray*  
9 *data analysis*. Paper presented at the International Conference on Knowledge-Based and  
10 Intelligent Information and Engineering Systems.
- 11 Irizarry, R. A., Bolstad, B. M., Collin, F., Cope, L. M., Hobbs, B., & Speed, T. P. 2003. Summaries  
12 of Affymetrix GeneChip probe level data. *Nucleic acids research*, 31(4), e15-e15.
- 13 Jafari, P., & Azuaje, F. 2006. An assessment of recently published gene expression data analyses:  
14 reporting experimental design and statistical factors. *BMC Medical Informatics and*  
15 *Decision Making*, 6(1), 27.
- 16 Jones, J. D., & Dangl, J. L. 2006. The plant immune system. *Nature*, 444(7117), 323-329.
- 17 Kaul, S., Koo, H. L., Jenkins, J., Rizzo, M., Rooney, T., Tallon, L. J., Feldblyum, T., Nierman,  
18 W., Benito, M. I., & Lin, X. 2000. Analysis of the genome sequence of the flowering plant  
19 *Arabidopsis thaliana*. *Nature*, 408(6814), 796-815.
- 20 Klees, S., Lange, T. M., Bertram, H., Rajavel, A., Schlüter, J.-S., Lu, K., Schmitt, A. O., & Gültas,  
21 M. 2021. In Silico Identification of the Complex Interplay between Regulatory SNPs,  
22 Transcription Factors, and Their Related Genes in *Brassica napus* L. Using Multi-Omics  
23 Data. *International journal of molecular sciences*, 22(2), 789.
- 24 Konishi, M., Donner, T. J., Scarpella, E., & Yanagisawa, S. 2015. MONOPTEROS directly  
25 activates the auxin-inducible promoter of the Dof5. 8 transcription factor gene in  
26 *Arabidopsis thaliana* leaf provascular cells. *Journal of experimental botany*, 66(1), 283-  
27 291.
- 28 Konishi, M., & Yanagisawa, S. 2015. Transcriptional repression caused by Dof5. 8 is involved in  
29 proper vein network formation in *Arabidopsis thaliana* leaves. *Journal of plant research*,  
30 128(4), 643-652.
- 31 Krupinska, K., Dähnhardt, D., Fischer-Kilbienski, I., Kucharewicz, W., Scharrenberg, C., Trösch,  
32 M., & Buck, F. 2014. Identification of WHIRLY1 as a factor binding to the promoter of  
33 the stress-and senescence-associated gene HvS40. *Journal of plant growth regulation*,  
34 33(1), 91-105.
- 35 Langfelder, P., Zhang, B., & Horvath, S. 2008. Defining clusters from a hierarchical cluster tree:  
36 the Dynamic Tree Cut package for R. *Bioinformatics*, 24(5), 719-720.
- 37 Li, C. Y., Cai, J.-H., Tsai, J. J., & Wang, C. C. 2020. Identification of hub genes associated with  
38 development of head and neck squamous cell carcinoma by integrated bioinformatics  
39 analysis. *Frontiers in Oncology*, 10, 681.
- 40 Lin, W., Zhang, H., Huang, D., Schenke, D., Cai, D., Wu, B., & Miao, Y. 2020. Dual-located  
41 WHIRLY1 affects salicylic acid homeostasis via coordination of ICS1, PAL1 and BSMT1  
42 during *Arabidopsis* plant aging. *BioRxiv*.
- 43 Liu, B., Ouyang, Z., Zhang, Y., Li, X., Hong, Y., Huang, L., Liu, S., Zhang, H., Li, D., & Song,  
44 F. 2014. Tomato NAC transcription factor SISR1 positively regulates defense response  
45 against biotic stress but negatively regulates abiotic stress response. *PLoS One*, 9(7),  
46 e102067.



- 1 Liu, Z., Xie, M., Yao, Z., Niu, Y., Bu, Y., & Gao, C. 2013. Three meta-analyses define a set of  
2 commonly overexpressed genes from microarray datasets on astrocytomas. *Molecular*  
3 *neurobiology*, 47(1), 325-336.
- 4 Luo, K., Yao, X.-J., Luo, C., Hu, X.-S., Wang, C.-P., Wang, Y., Hu, Z.-Q., Zhang, G.-S., & Zhao,  
5 H.-Y. 2019. Biological and morphological features associated with english grain aphid and  
6 bird cherry-oat aphid tolerance in winter wheat line XN98-10-35. *Journal of plant growth*  
7 *regulation*, 38(1), 46-54.
- 8 Martinelli, F., Uratsu, S. L., Albrecht, U., Reagan, R. L., Phu, M. L., Britton, M., Buffalo, V., Fass,  
9 J., Leicht, E., & Zhao, W. 2012. Transcriptome profiling of citrus fruit response to  
10 huanglongbing disease. *PLoS One*, 7(5), e38039.
- 11 Massey, F. P., Ennos, A. R., & Hartley, S. E. 2007. Grasses and the resource availability  
12 hypothesis: the importance of silica-based defences. *Journal of Ecology*, 95(3), 414-424.
- 13 McMullen, M., Jones, R., & Gallenberg, D. 1997. Scab of wheat and barley: a re-emerging disease  
14 of devastating impact. *Plant disease*, 81(12), 1340-1348.
- 15 Milne, R. J., Dibley, K. E., Schnippenkoetter, W., Mascher, M., Lui, A. C., Wang, L., Lo, C.,  
16 Ashton, A. R., Ryan, P. R., & Lagudah, E. S. 2019. The wheat Lr67 gene from the sugar  
17 transport protein 13 family confers multipathogen resistance in barley. *Plant Physiology*,  
18 179(4), 1285-1297.
- 19 Parry, D., Jenkinson, P., & McLeod, L. 1995. Fusarium ear blight (scab) in small grain cereals—  
20 a review. *Plant pathology*, 44(2), 207-238.
- 21 Pieterse, C. M., Leon-Reyes, A., Van der Ent, S., & Van Wees, S. C. 2009. Networking by small-  
22 molecule hormones in plant immunity. *Nature chemical biology*, 5(5), 308-316.
- 23 Pieterse, C. M., Van der Does, D., Zamioudis, C., Leon-Reyes, A., & Van Wees, S. C. 2012.  
24 Hormonal modulation of plant immunity. *Annual review of cell and developmental biology*,  
25 28, 489-521.
- 26 Punelli, F., Al Hassan, M., Fileccia, V., Uva, P., Pasquini, G., & Martinelli, F. 2016. A microarray  
27 analysis highlights the role of tetrapyrrole pathways in grapevine responses to “stolbur”  
28 phytoplasma, phloem virus infections and recovered status. *Physiological and Molecular*  
29 *Plant Pathology*, 93, 129-137.
- 30 Ray, M., Ray, A., Dash, S., Mishra, A., Achary, K. G., Nayak, S., & Singh, S. 2017. Fungal disease  
31 detection in plants: Traditional assays, novel diagnostic techniques and biosensors.  
32 *Biosensors and Bioelectronics*, 87, 708-723.
- 33 Reymond, P., Weber, H., Damond, M., & Farmer, E. E. 2000. Differential gene expression in  
34 response to mechanical wounding and insect feeding in Arabidopsis. *The Plant Cell*, 12(5),  
35 707-719.
- 36 Rhodes, D. R., Barrette, T. R., Rubin, M. A., Ghosh, D., & Chinnaiyan, A. M. 2002. Meta-analysis  
37 of microarrays: interstudy validation of gene expression profiles reveals pathway  
38 dysregulation in prostate cancer. *Cancer research*, 62(15), 4427-4433.
- 39 Ritchie, M. E., Silver, J., Oshlack, A., Holmes, M., Diyagama, D., Holloway, A., & Smyth, G. K.  
40 2007. A comparison of background correction methods for two-colour microarrays.  
41 *Bioinformatics*, 23(20), 2700-2707.
- 42 Rung, J., & Brazma, A. 2013. Reuse of public genome-wide gene expression data. *Nature Reviews*  
43 *Genetics*, 14(2), 89.
- 44 Ruta, V., Longo, C., Lepri, A., De Angelis, V., Occhigrossi, S., Costantino, P., & Vittorioso, P.  
45 2020. The DOF transcription factors in seed and seedling development. *Plants*, 9(2), 218.

- 1 Ryals, J. A., Neuenschwander, U. H., Willits, M. G., Molina, A., Steiner, H.-Y., & Hunt, M. D.  
2 1996. Systemic acquired resistance. *The Plant Cell*, 8(10), 1809.
- 3 Schulz, P., Herde, M., & Romeis, T. 2013. Calcium-dependent protein kinases: hubs in plant stress  
4 signaling and development. *Plant Physiology*, 163(2), 523-530.
- 5 Shaar-Moshe, L., Hübner, S., & Peleg, Z. 2015. Identification of conserved drought-adaptive genes  
6 using a cross-species meta-analysis approach. *BMC plant biology*, 15(1), 111.
- 7 Sharifi, S., Pakdel, A., Ebrahimi, M., Reecy, J. M., Farsani, S. F., & Ebrahimie, E. 2018.  
8 Integration of machine learning and meta-analysis identifies the transcriptomic bio-  
9 signaure of mastitis disease in cattle. *PLoS One*, 13(2), e0191227.
- 10 Sharma, R., De Vleeschauwer, D., Sharma, M. K., & Ronald, P. C. 2013. Recent advances in  
11 dissecting stress-regulatory crosstalk in rice. *Molecular Plant*, 6(2), 250-260.
- 12 Shen, Q.-H., Saijo, Y., Mauch, S., Biskup, C., Bieri, S., Keller, B., Seki, H., Ülker, B., Somssich,  
13 I. E., & Schulze-Lefert, P. 2007. Nuclear activity of MLA immune receptors links isolate-  
14 specific and basal disease-resistance responses. *science*, 315(5815), 1098-1103.
- 15 Shi, L., Reid, L. H., Jones, W. D., Shippy, R., Warrington, J. A., Baker, S. C., Collins, P. J., De  
16 Longueville, F., Kawasaki, E. S., & Lee, K. Y. 2006. The MicroArray Quality Control  
17 (MAQC) project shows inter-and intraplatform reproducibility of gene expression  
18 measurements. *Nature biotechnology*, 24(9), 1151.
- 19 Silver, J. D., Ritchie, M. E., & Smyth, G. K. 2009. Microarray background correction: maximum  
20 likelihood estimation for the normal-exponential convolution. *Biostatistics*, 10(2), 352-  
21 363.
- 22 Singh, R. P., Hodson, D. P., Jin, Y., Lagudah, E. S., Ayliffe, M. A., Bhavani, S., Rouse, M. N.,  
23 Pretorius, Z. A., Szabo, L. J., & Huerta-Espino, J. 2015. Emergence and spread of new  
24 races of wheat stem rust fungus: continued threat to food security and prospects of genetic  
25 control. *Phytopathology*, 105(7), 872-884.
- 26 Smyth, G. K. (2005). Limma: linear models for microarray data. In *Bioinformatics and*  
27 *computational biology solutions using R and Bioconductor* (pp. 397-420): Springer.
- 28 Tahmasebi, A., Ashrafi-Dehkordi, E., Shahriari, A. G., Mazloomi, S. M., & Ebrahimie, E. 2019a.  
29 Integrative meta-analysis of transcriptomic responses to abiotic stress in cotton. *Progress*  
30 *in biophysics and molecular biology*, 146, 112-122.
- 31 Tahmasebi, A., Ebrahimie, E., Pakniyat, H., Ebrahimi, M., & Mohammadi-Dehcheshmeh, M.  
32 2019b. Tissue-specific transcriptional biomarkers in medicinal plants: Application of  
33 large-scale meta-analysis and computational systems biology. *Gene*, 691, 114-124.
- 34 Tao, Y., Xie, Z., Chen, W., Glazebrook, J., Chang, H.-S., Han, B., Zhu, T., Zou, G., & Katagiri,  
35 F. 2003. Quantitative nature of Arabidopsis responses during compatible and incompatible  
36 interactions with the bacterial pathogen *Pseudomonas syringae*. *The Plant Cell*, 15(2), 317-  
37 330.
- 38 Torres, M. A., Jones, J. D., & Dangl, J. L. 2006. Reactive oxygen species signaling in response to  
39 pathogens. *Plant Physiology*, 141(2), 373-378.
- 40 Tseng, G. C., Ghosh, D., & Feingold, E. 2012. Comprehensive literature review and statistical  
41 considerations for microarray meta-analysis. *Nucleic acids research*, 40(9), 3785-3799.
- 42 Van Loon, L. (2000). Systemic induced resistance. In *Mechanisms of resistance to plant diseases*  
43 (pp. 521-574): Springer.
- 44 Van Loon, L., Bakker, P., & Pieterse, C. 1998. Systemic resistance induced by rhizosphere  
45 bacteria. *Annual review of phytopathology*, 36(1), 453-483.

- 1 Van Wees, S. C., De Swart, E. A., Van Pelt, J. A., Van Loon, L. C., & Pieterse, C. M. 2000.  
2 Enhancement of induced disease resistance by simultaneous activation of salicylate-and  
3 jasmonate-dependent defense pathways in *Arabidopsis thaliana*. *Proceedings of the*  
4 *National Academy of Sciences*, 97(15), 8711-8716.
- 5 Vlot, A. C., Dempsey, D. M. A., & Klessig, D. F. 2009. Salicylic acid, a multifaceted hormone to  
6 combat disease. *Annual review of phytopathology*, 47, 177-206.
- 7 Walters, D. R., Ratsep, J., & Havis, N. D. 2013. Controlling crop diseases using induced resistance:  
8 challenges for the future. *Journal of experimental botany*, 64(5), 1263-1280.
- 9 Wang, D., Amornsiripanitch, N., & Dong, X. 2006. A genomic approach to identify regulatory  
10 nodes in the transcriptional network of systemic acquired resistance in plants. *PLoS*  
11 *pathogens*, 2(11), e123.
- 12 Wang, J., Xu, C., Sun, Q., Xu, J., Chai, Y., Berg, G., Cernava, T., Ma, Z., & Chen, Y. 2021. Post-  
13 translational regulation of autophagy is involved in intra-microbiome suppression of fungal  
14 pathogens. *Microbiome*, 9(1), 1-18.
- 15 Wise, R. P., Moscou, M. J., Bogdanove, A. J., & Whitham, S. A. 2007. Transcript profiling in  
16 host–pathogen interactions. *Annu. Rev. Phytopathol.*, 45, 329-369.
- 17 Xia, J., Benner, M. J., & Hancock, R. E. 2014. NetworkAnalyst-integrative approaches for  
18 protein–protein interaction network analysis and visual exploration. *Nucleic acids*  
19 *research*, 42(W1), W167-W174.
- 20 Ye, Y., Ding, Y., Jiang, Q., Wang, F., Sun, J., & Zhu, C. 2017. The role of receptor-like protein  
21 kinases (RLKs) in abiotic stress response in plants. *Plant cell reports*, 36(2), 235-242.
- 22 Yip, A. M., & Horvath, S. 2007. Gene network interconnectedness and the generalized topological  
23 overlap measure. *BMC bioinformatics*, 8(1), 22.
- 24 Zheng, M., Zhu, C., Yang, T., Qian, J., & Hsu, Y.-F. 2020. GSM2, a transaldolase, contributes to  
25 reactive oxygen species homeostasis in *Arabidopsis*. *Plant molecular biology*, 104(1), 39-  
26 53.

27

28

29

30

31

32 **Table 1.**

| Module name | Number genes | Module        | Number genes |
|-------------|--------------|---------------|--------------|
| Blue        | 296          | Blue.csv      | 3858         |
| Brown       | 229          | Brown.csv     | 732          |
| Green       | 81           | Green.csv     | 42           |
| Red         | 68           | Red.csv       | 78           |
| Turquoise   | 431          | Turquoise.csv | 9746         |
| Yellow      | 124          | Yellow.csv    | 2705         |

33

34 **Table 2.**

| Module name | Number genes | Module        | Number genes |
|-------------|--------------|---------------|--------------|
| Blue        | 926          | Blue.csv      | 9181         |
| Brown       | 305          | Brown.csv     | 557          |
| Green       | 206          | Green.csv     | 505          |
| Red         | 142          | Red.csv       | 21           |
| Turquoise   | 947          | Turquoise.csv | 8303         |
| Yellow      | 221          | Yellow.csv    | 394          |
| Black       | 141          | Black.csv     | 82           |

1

2 **Table 3.**

| Family             | Count | Accession                     | Up/Down | Module    | Treatment |
|--------------------|-------|-------------------------------|---------|-----------|-----------|
|                    | 1     | Contig11835_at<br>(AT5G58950) | Up      | Turquoise | Biotic    |
| TKL-PI-4           | 1     | Contig11835_at<br>(AT5G58950) | Up      | Red       | Hormonal  |
|                    | 1     | Contig18153_at<br>(AT4G35780) | Down    | Turquoise | Hormonal  |
| RLK-Pelle_LRR-XI-1 | 1     | Contig15860_at<br>(AT1G34420) | Up      | Blue      | Biotic    |
| RLK-Pelle_SD-2b    | 1     | Contig18914_at<br>(AT4G32300) | Up      | Turquoise | Biotic    |
| RLK-Pelle_SD-2b    | 1     | Contig22773_at<br>(AT5G60900) | Up      | Black     | Hormonal  |

3

4 **Table 4**

| Motif name | Motif Logo                                                                          | E-value  | Width | Best match in JASPAR and PLACE | Significant GO term identified by GOMO                                                                                 |
|------------|-------------------------------------------------------------------------------------|----------|-------|--------------------------------|------------------------------------------------------------------------------------------------------------------------|
| Motif 1    | 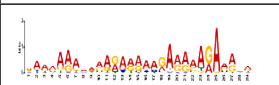 | 7.2e-083 | 29    | MA1267.1                       | CC: chloroplast                                                                                                        |
| Motif 2    |  | 8.3e-035 | 15    | MA1267.1                       |                                                                                                                        |
| Motif 3    |  | 8.6e-031 | 21    | MA1267.1                       | CC: plasma membrane<br>MF: transcription factor activity                                                               |
| Motif 4    |  | 1.5e-013 | 29    | MA1403.1                       | MF: transcription factor activity<br>BP: regulation of transcription<br>CC: endomembrane system<br>CC: plasma membrane |
| Motif 5    |  | 2.5e-006 | 48    | MA0657.1                       | MF: transcription factor activity<br>CC: nucleus<br>CC: plasma membrane<br>MF: protein binding                         |

|          |                                                                                    |          |    |          |                                                                                                                                                                                                 |
|----------|------------------------------------------------------------------------------------|----------|----|----------|-------------------------------------------------------------------------------------------------------------------------------------------------------------------------------------------------|
|          |                                                                                    |          |    |          | BP: regulation of transcription, DNA-dependent                                                                                                                                                  |
| Motif 6  | 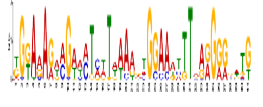  | 1.0e-004 | 41 | MA1267.1 | MF: transcription factor activity<br>CC: nucleus<br>CC: plasma membrane<br>MF: protein binding<br>MF: protein serine/threonine kinase activity                                                  |
| Motif 7  |   | 2.9e-002 | 29 | MA0014.3 | MF: transcription factor activity<br>CC: nucleus<br>CC: plasma membrane<br>BP: regulation of transcription, DNA-dependent<br>MF: protein binding                                                |
| Motif 8  |   | 2.1e-001 | 11 | MA1268.1 |                                                                                                                                                                                                 |
| Motif 9  |   | 3.8e-002 | 39 | MA1327.1 |                                                                                                                                                                                                 |
| Motif 10 |   | 1.4e+000 | 29 | MA1354.1 | MF: transcription factor activity<br>CC: plasma membrane                                                                                                                                        |
| Motif 11 |  | 1.3e+001 | 15 | MA1267.1 | CC: plasma membrane<br>CC: nucleus<br>BP: transmembrane receptor protein tyrosine kinase signaling pathway<br>MF: transcription factor activity<br>MF: protein serine/threonine kinase activity |

1

2 **Table. 5**

| Motif name | Motif Logo                                                                          | E-value  | Width | Best match in JASPAR and PLACE | Significant GO term identified by GOMO                                                                                                                                    |
|------------|-------------------------------------------------------------------------------------|----------|-------|--------------------------------|---------------------------------------------------------------------------------------------------------------------------------------------------------------------------|
| Motif 1    | 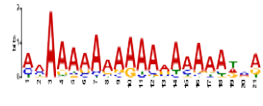 | 5.7e-101 | 21    | MA1267.1                       | MF:transcription factor activity<br>CC: nucleus<br>CC: plasma membrane<br>BP: regulation of transcription, DNA-dependent                                                  |
| Motif 2    |  | 1.6e-074 | 50    | MA0150.2                       | MF: transcription factor activity<br>CC: nucleus<br>CC: plasma membrane                                                                                                   |
| Motif 3    |  | 8.2e-071 | 50    | MA0072.1                       | MF: transcription factor activity<br>CC: nucleus<br>CC: plasma membrane<br>BP: regulation of transcription, DNA-dependent<br>MF: protein serine/threonine kinase activity |
| Motif 4    |  | 3.0e-069 | 50    | MA1268.1                       | CC: chloroplast<br>BP: regulation of transcription<br>MF: transcription factor activity                                                                                   |

|          |                                                                                   |          |    |          |                                   |
|----------|-----------------------------------------------------------------------------------|----------|----|----------|-----------------------------------|
| Motif 5  | 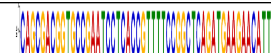 | 2.1e-068 | 50 | MA1277.1 | CC: chloroplast                   |
| Motif 6  |  | 6.4e-058 | 50 | MA1260.1 |                                   |
| Motif 7  |  | 9.0e-058 | 21 | MA1267.1 |                                   |
| Motif 8  |  | 3.1e-054 | 50 | MA0777.1 |                                   |
| Motif 9  |  | 4.5e-054 | 50 | MA0680.1 | MF: transcription factor activity |
| Motif 10 |  | 1.2e-053 | 50 | MA0578.1 |                                   |
| Motif 11 |  | 9.0e-053 | 50 | MA0415.1 |                                   |

1

2 **Table 6.**

| Selective mechanisms related to hormonal data |                                    | Selective mechanisms related to biotic data |                                     |
|-----------------------------------------------|------------------------------------|---------------------------------------------|-------------------------------------|
| Number of genes                               | Meaningful mechanism               | Number of genes                             | Meaningful mechanism                |
| 15                                            | Jasmonic acid biosynthetic process | 104                                         | Oxidation-reduction process         |
| 5                                             | Response to fungus                 | 9                                           | Hydrogen peroxide catabolic process |
| 17                                            | Defense response                   | 12                                          | Response to ethylene                |
| 3                                             | Auxin                              | 6                                           | Response to reactive oxygen species |
| 6                                             | Response to karrikin               | 11                                          | Oxidative stress                    |
| 9                                             | Defense response to bacterium      | 43                                          | Response to bacterium               |
| 2                                             | Salicylic acid catabolic process   | 24                                          | Response to cytokinin               |
| 4                                             | Response to nematode               | 40                                          | Photosynthesis                      |
|                                               |                                    | 16                                          | Jasmonic acid biosynthetic process  |

3

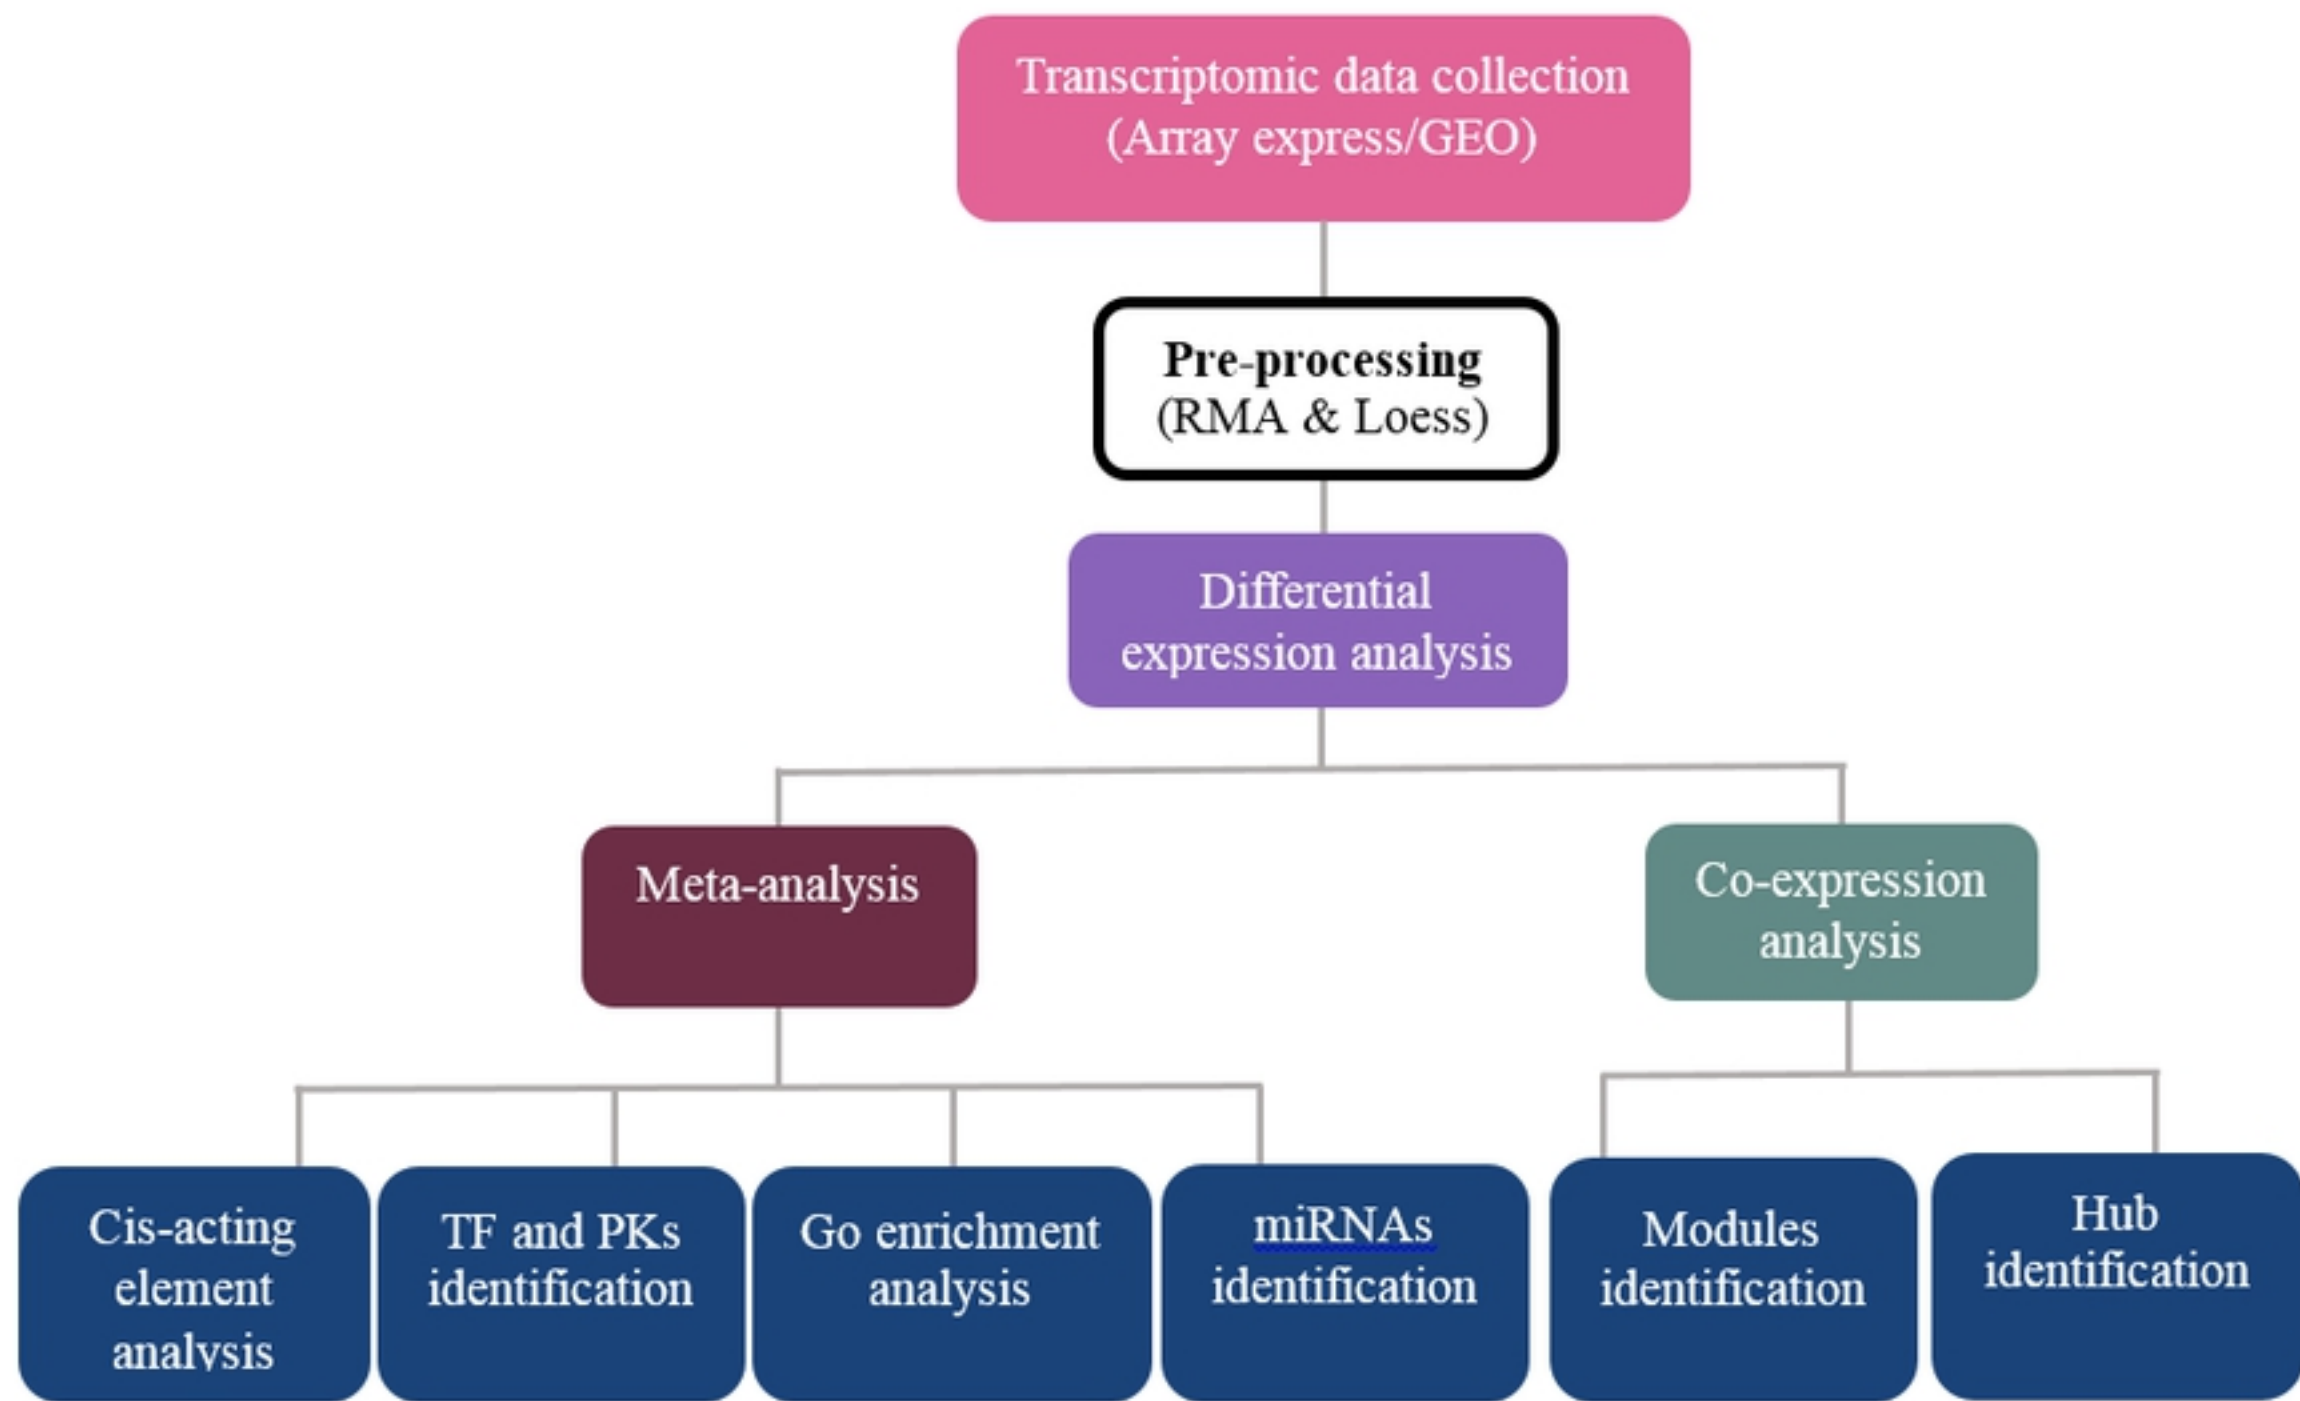

Figure 1

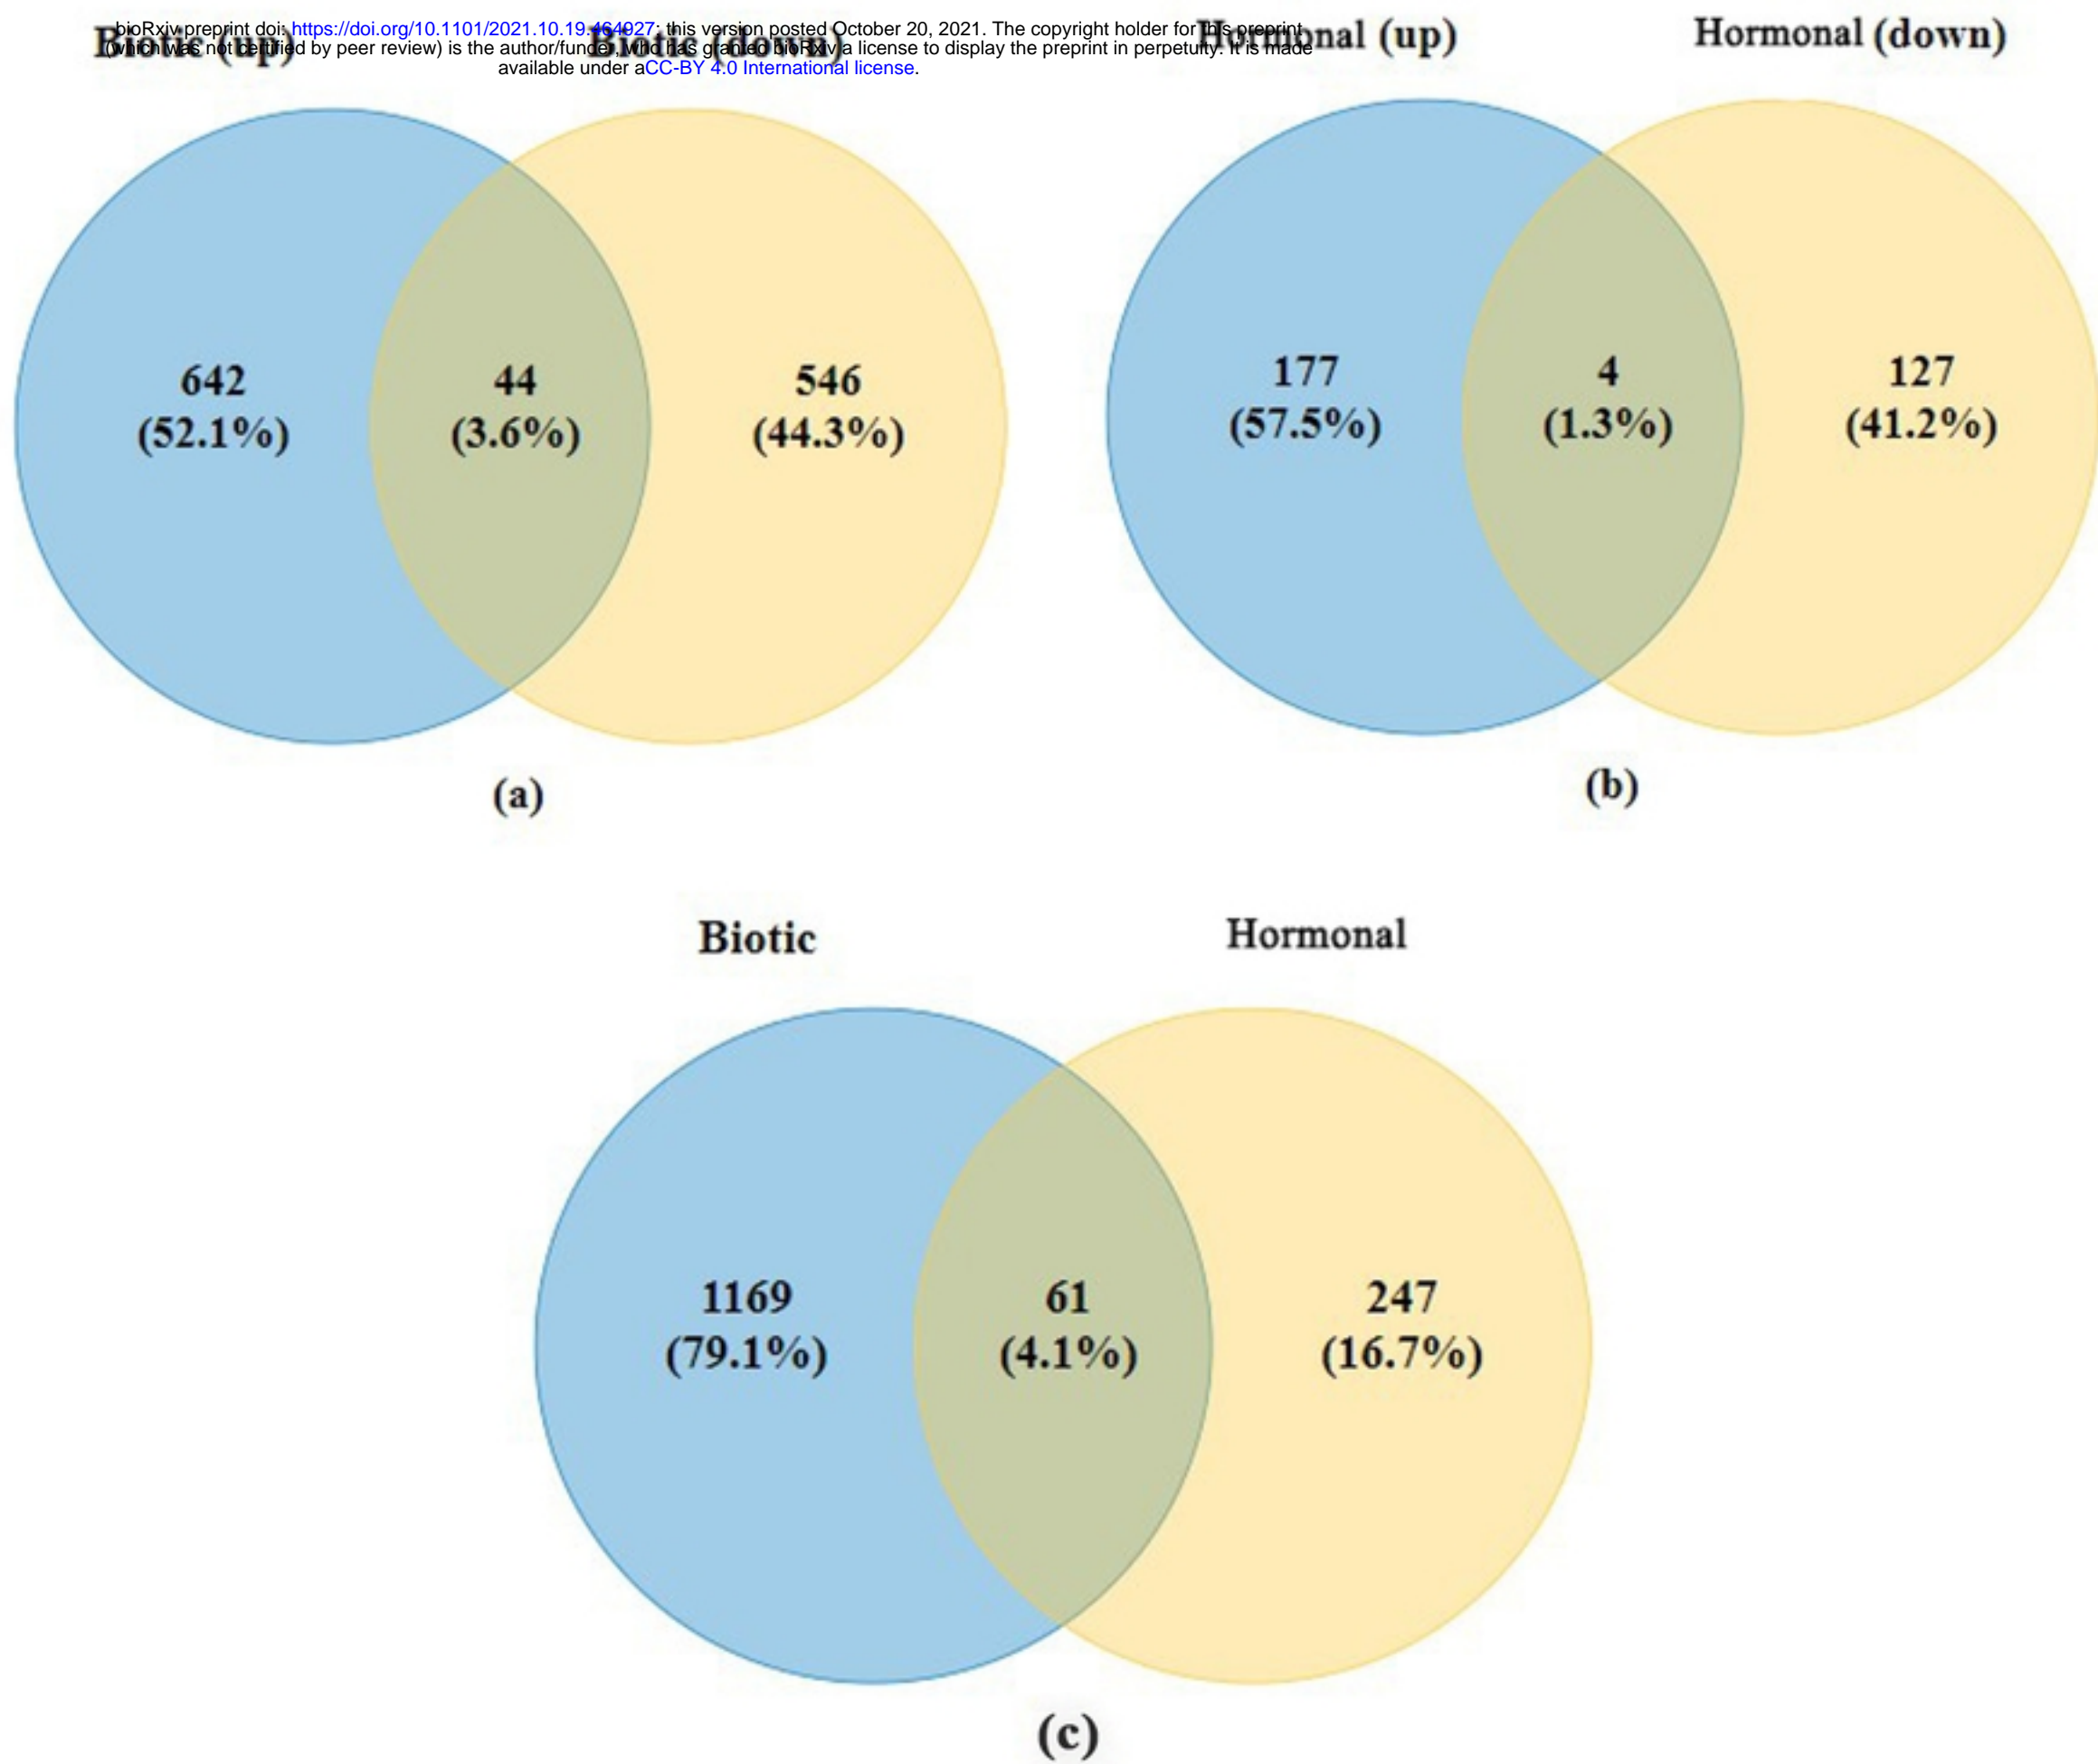

Figure 2



**Biotic (up)**

**Hormonal (down)**

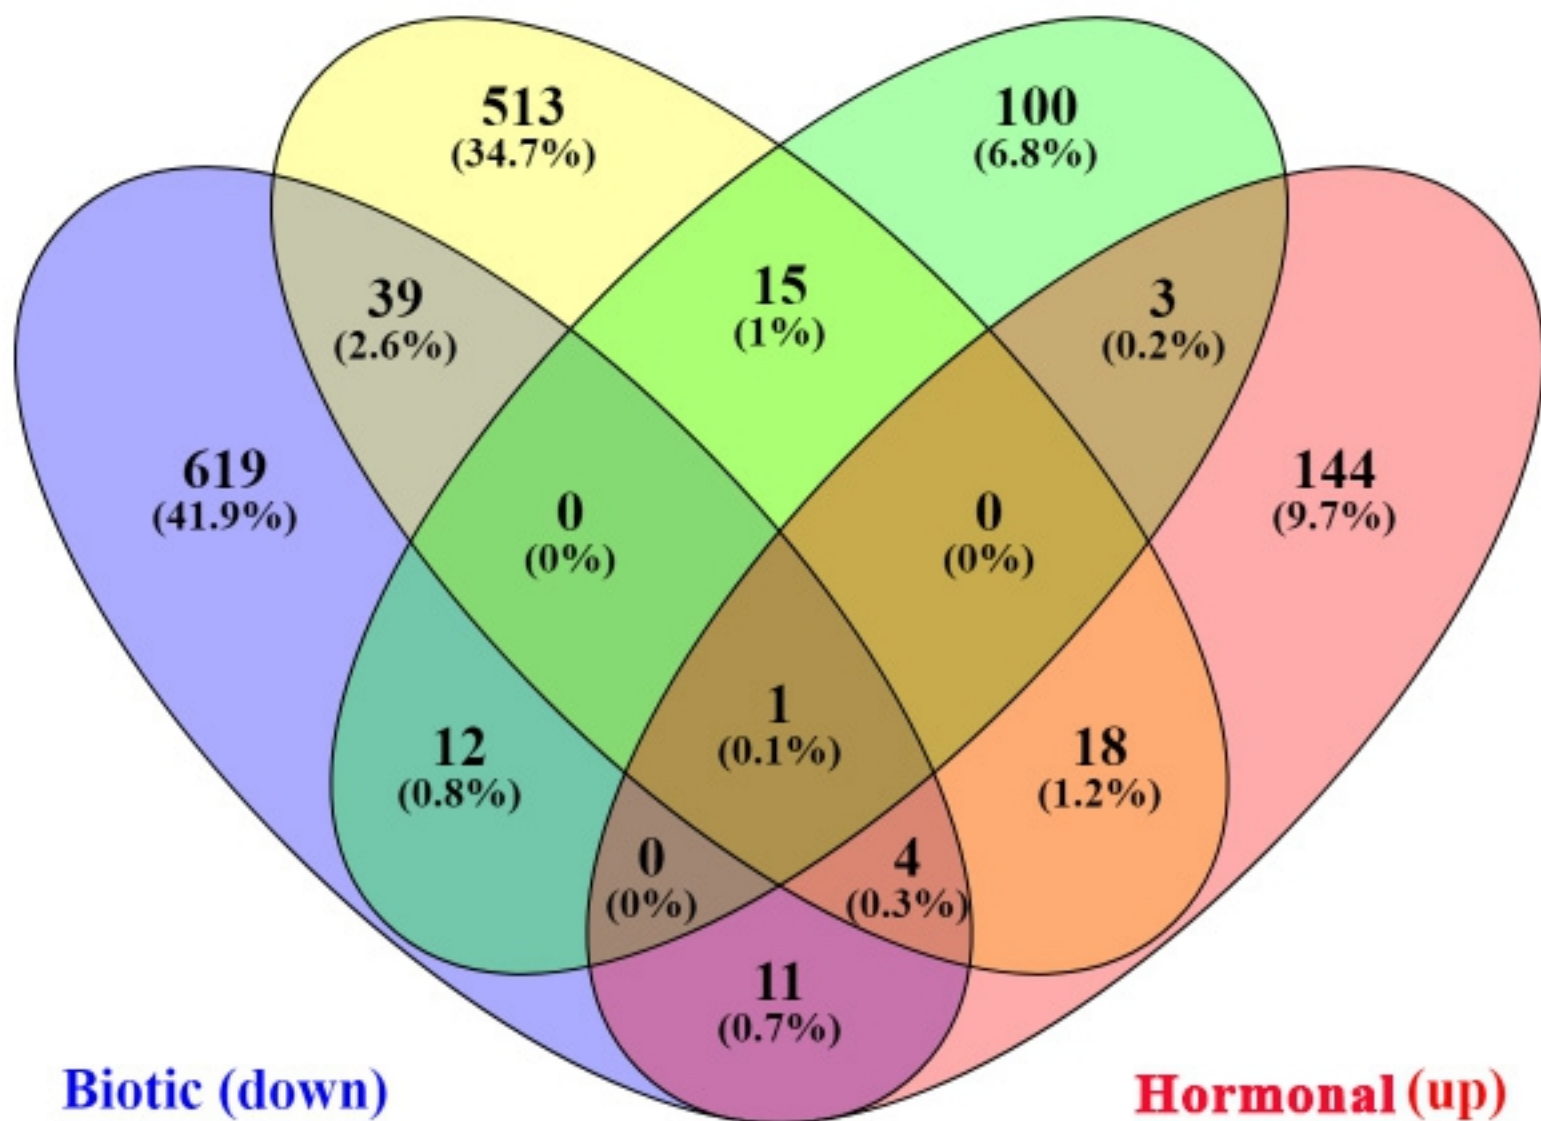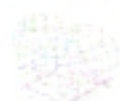

Figure 3

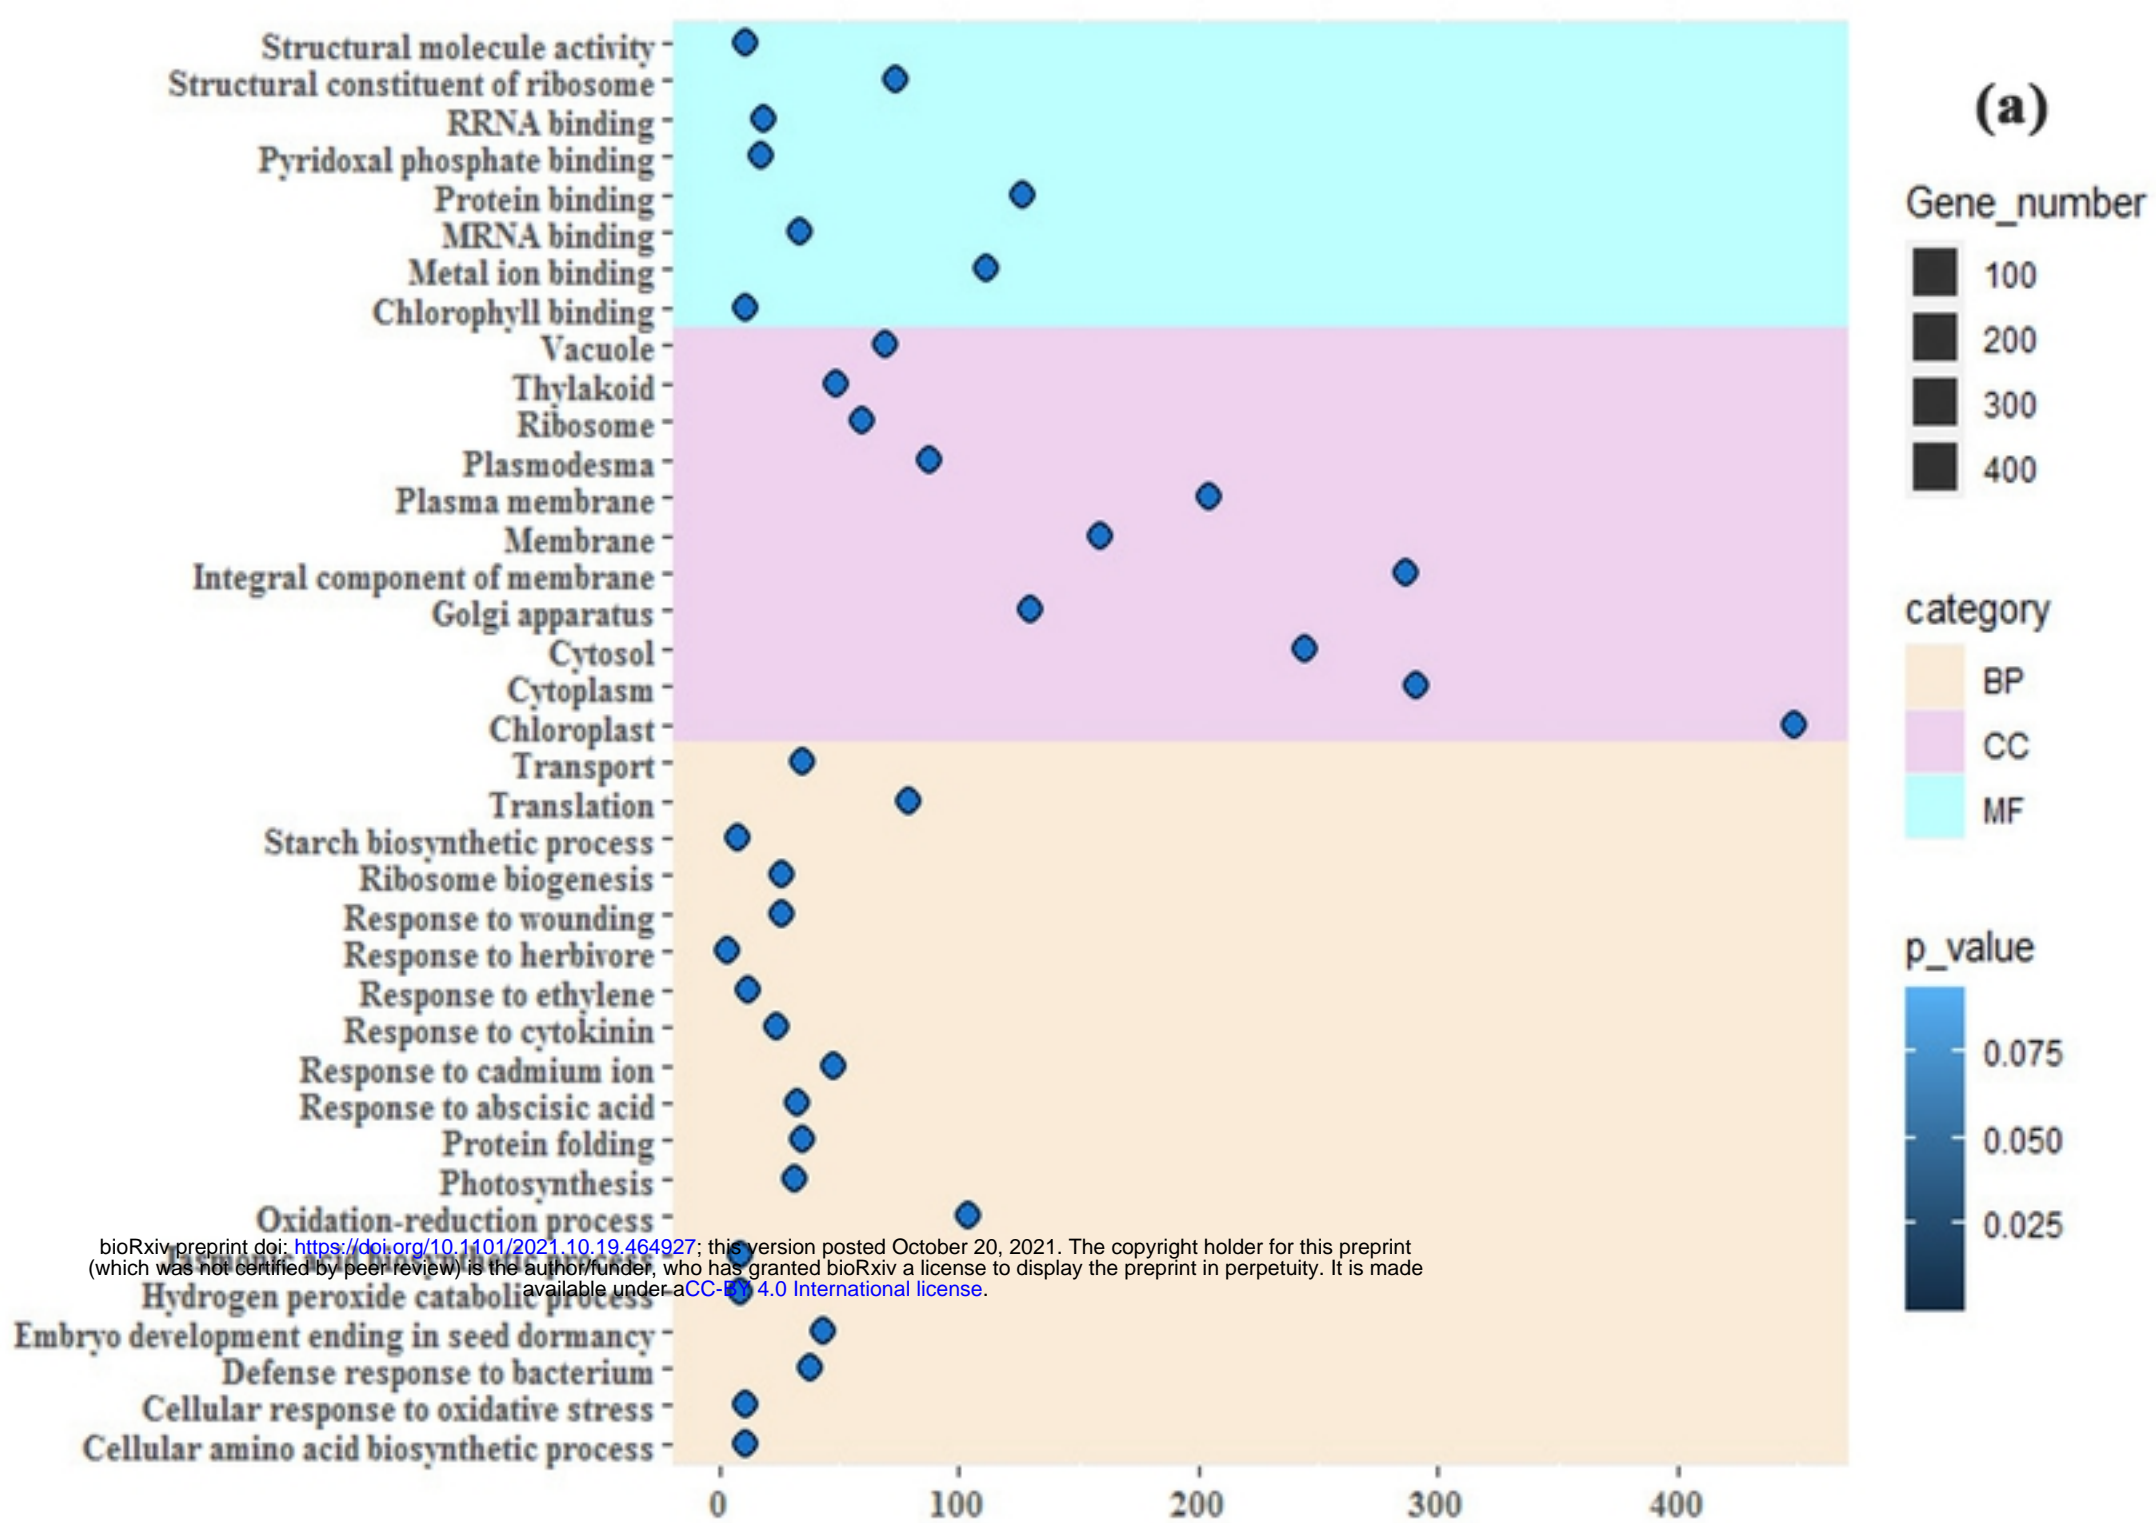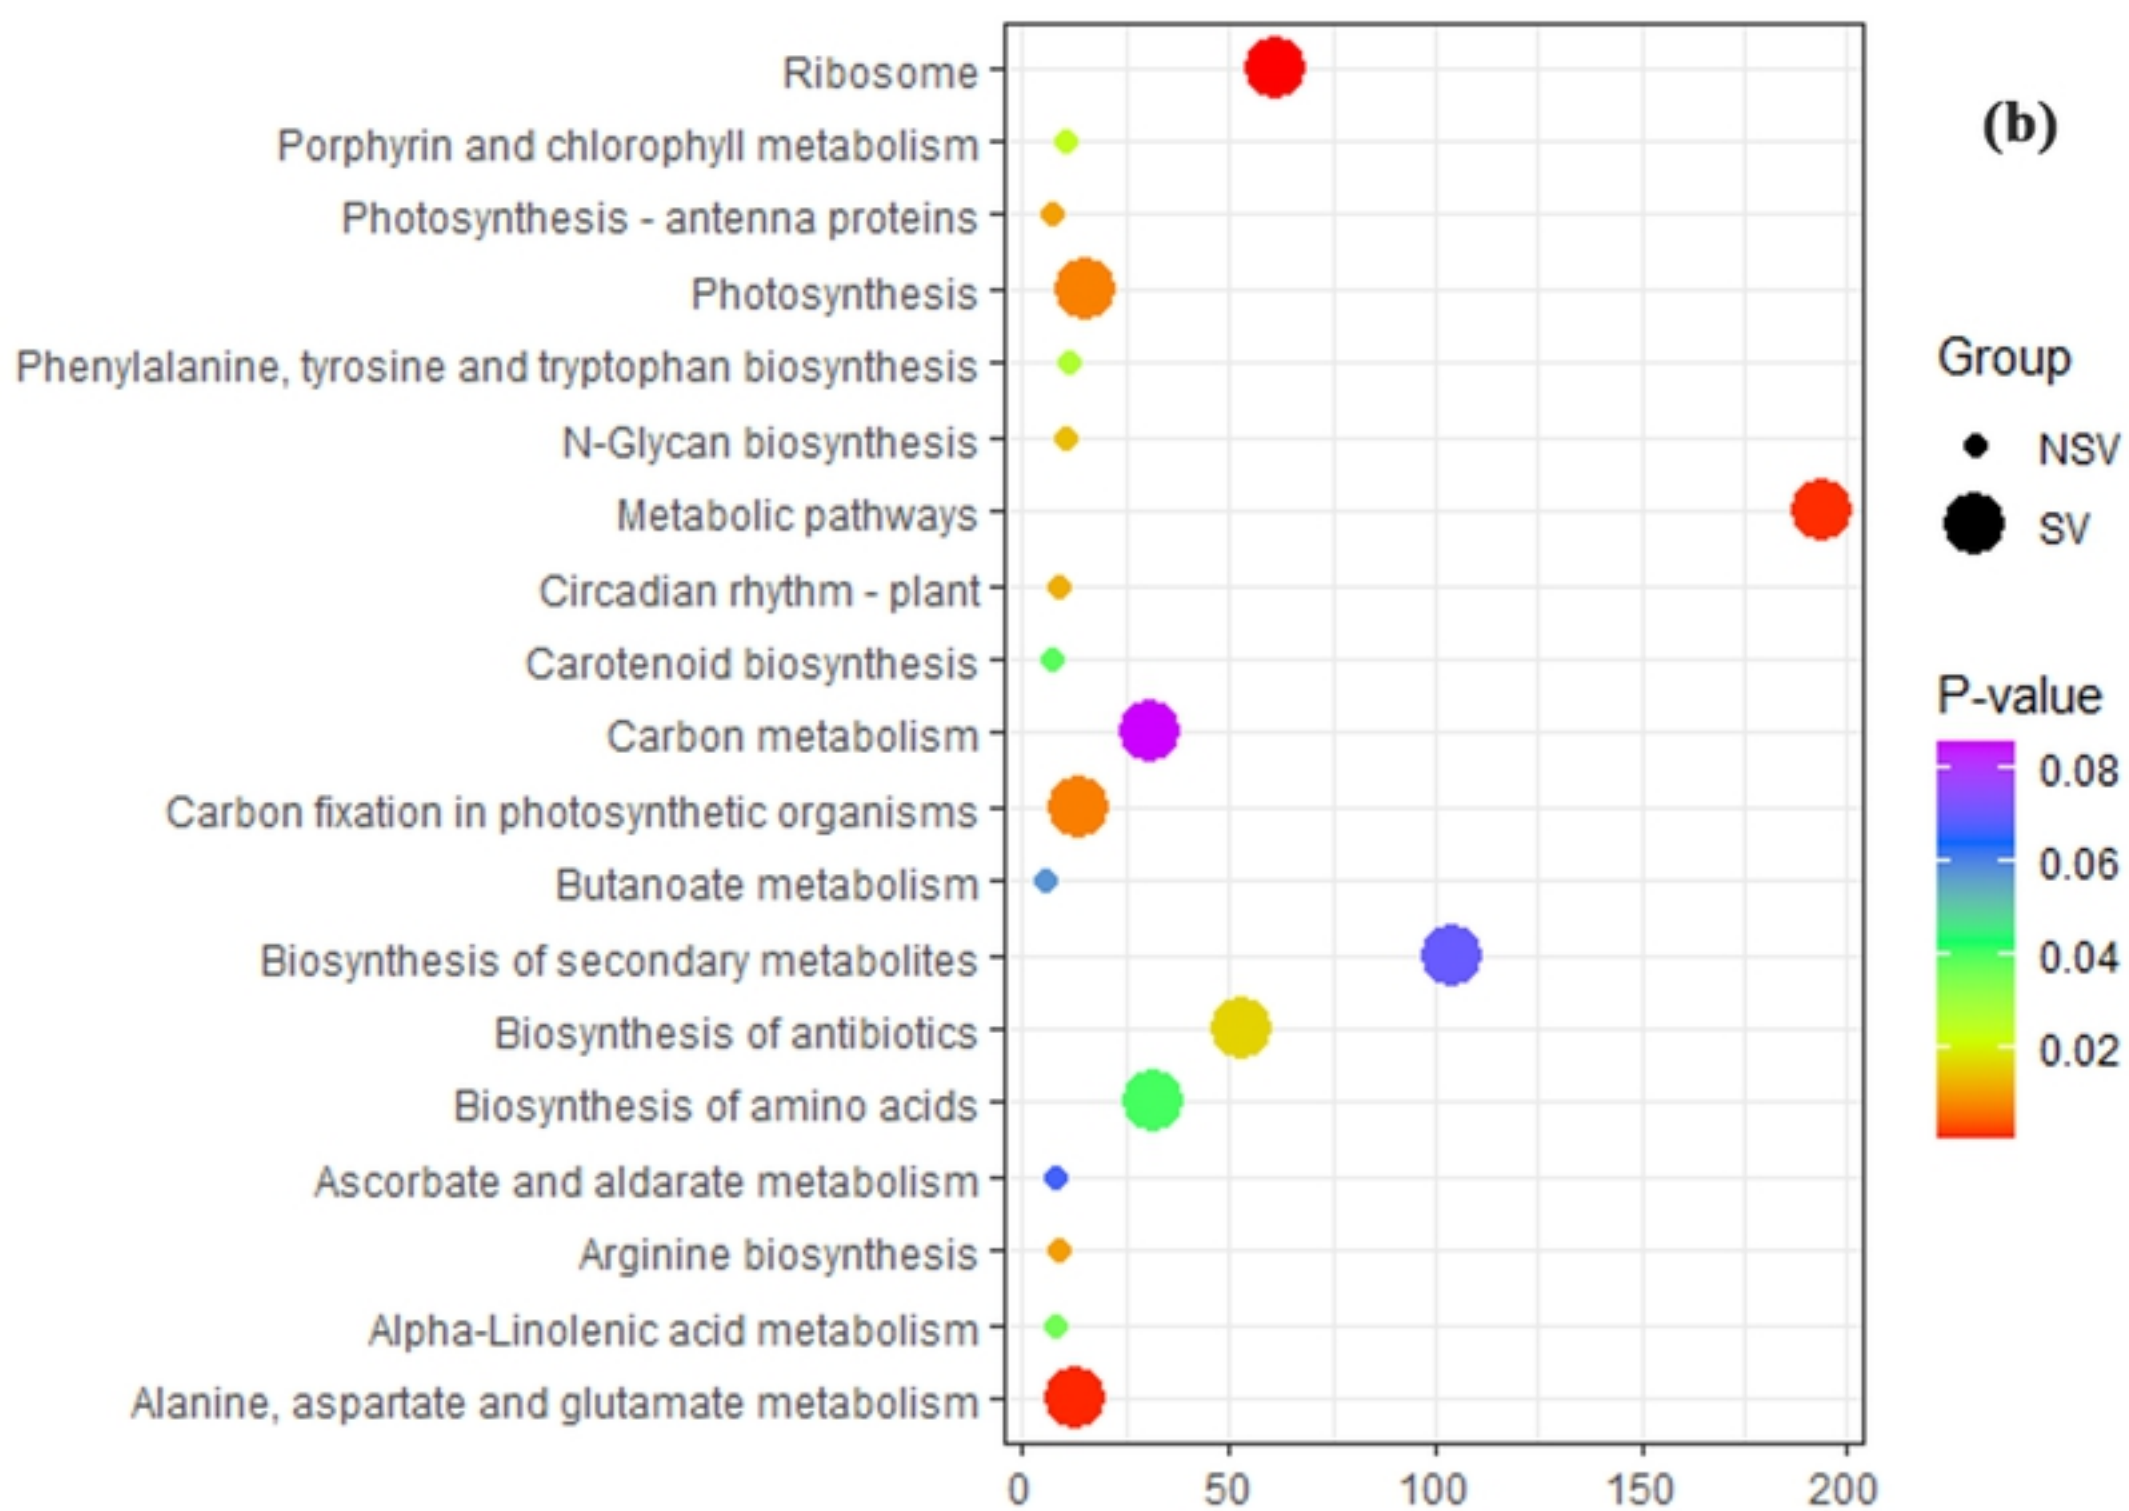

Figure 4

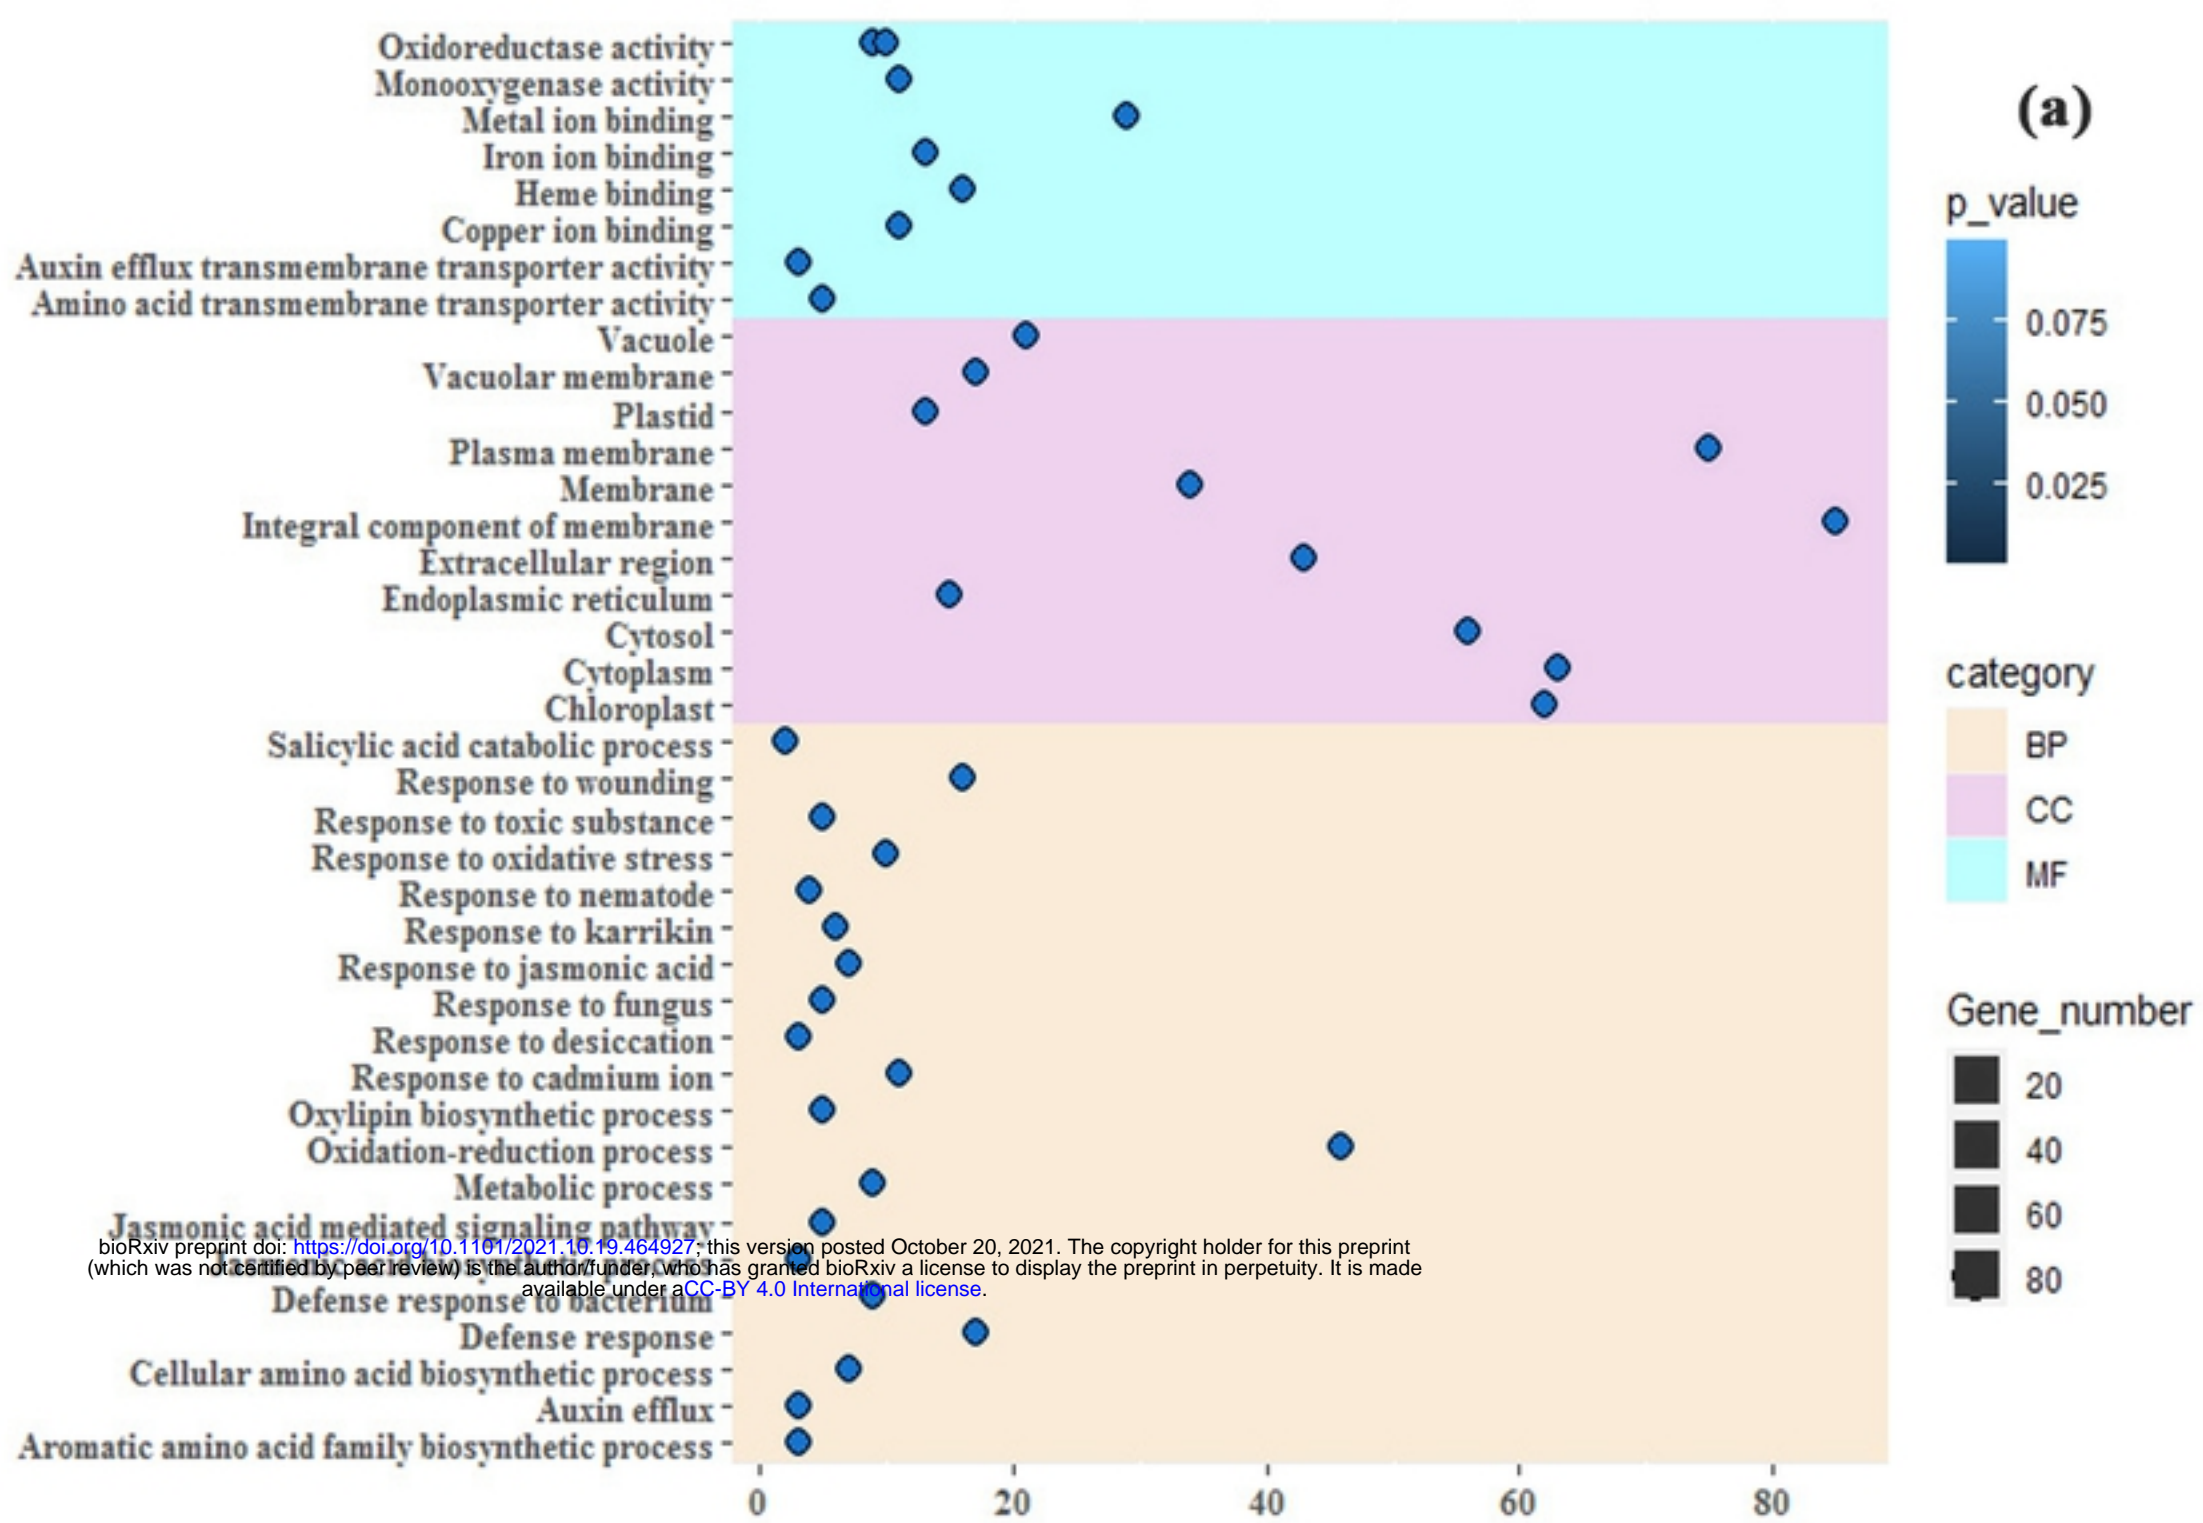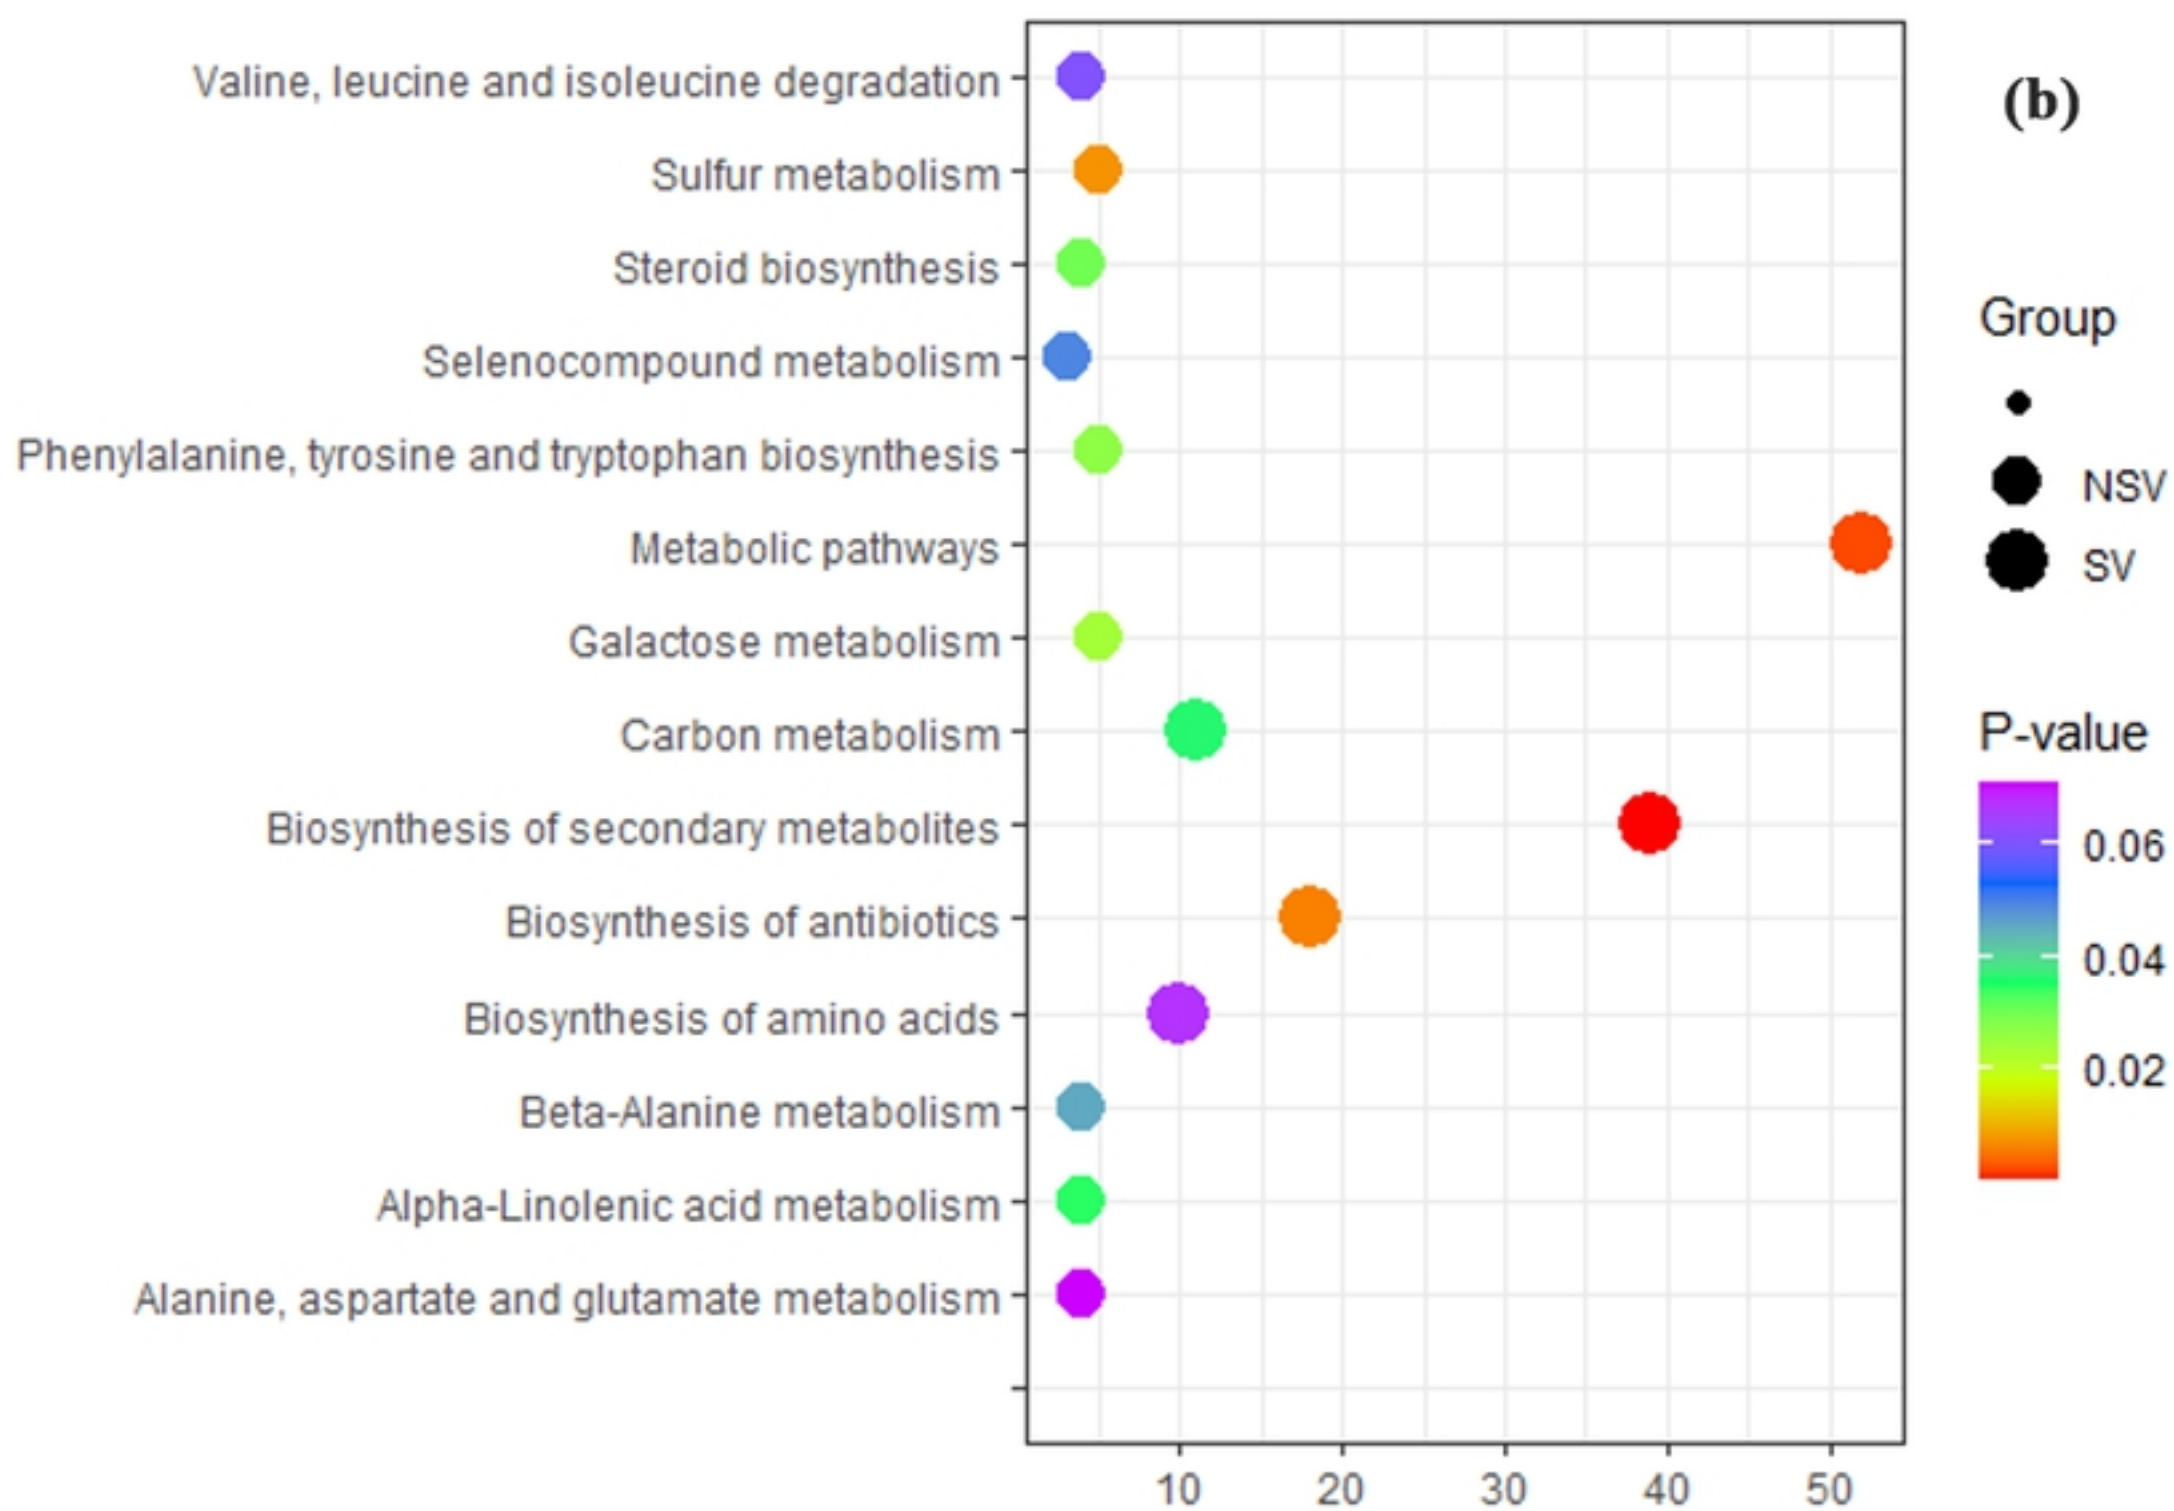

Figure 5

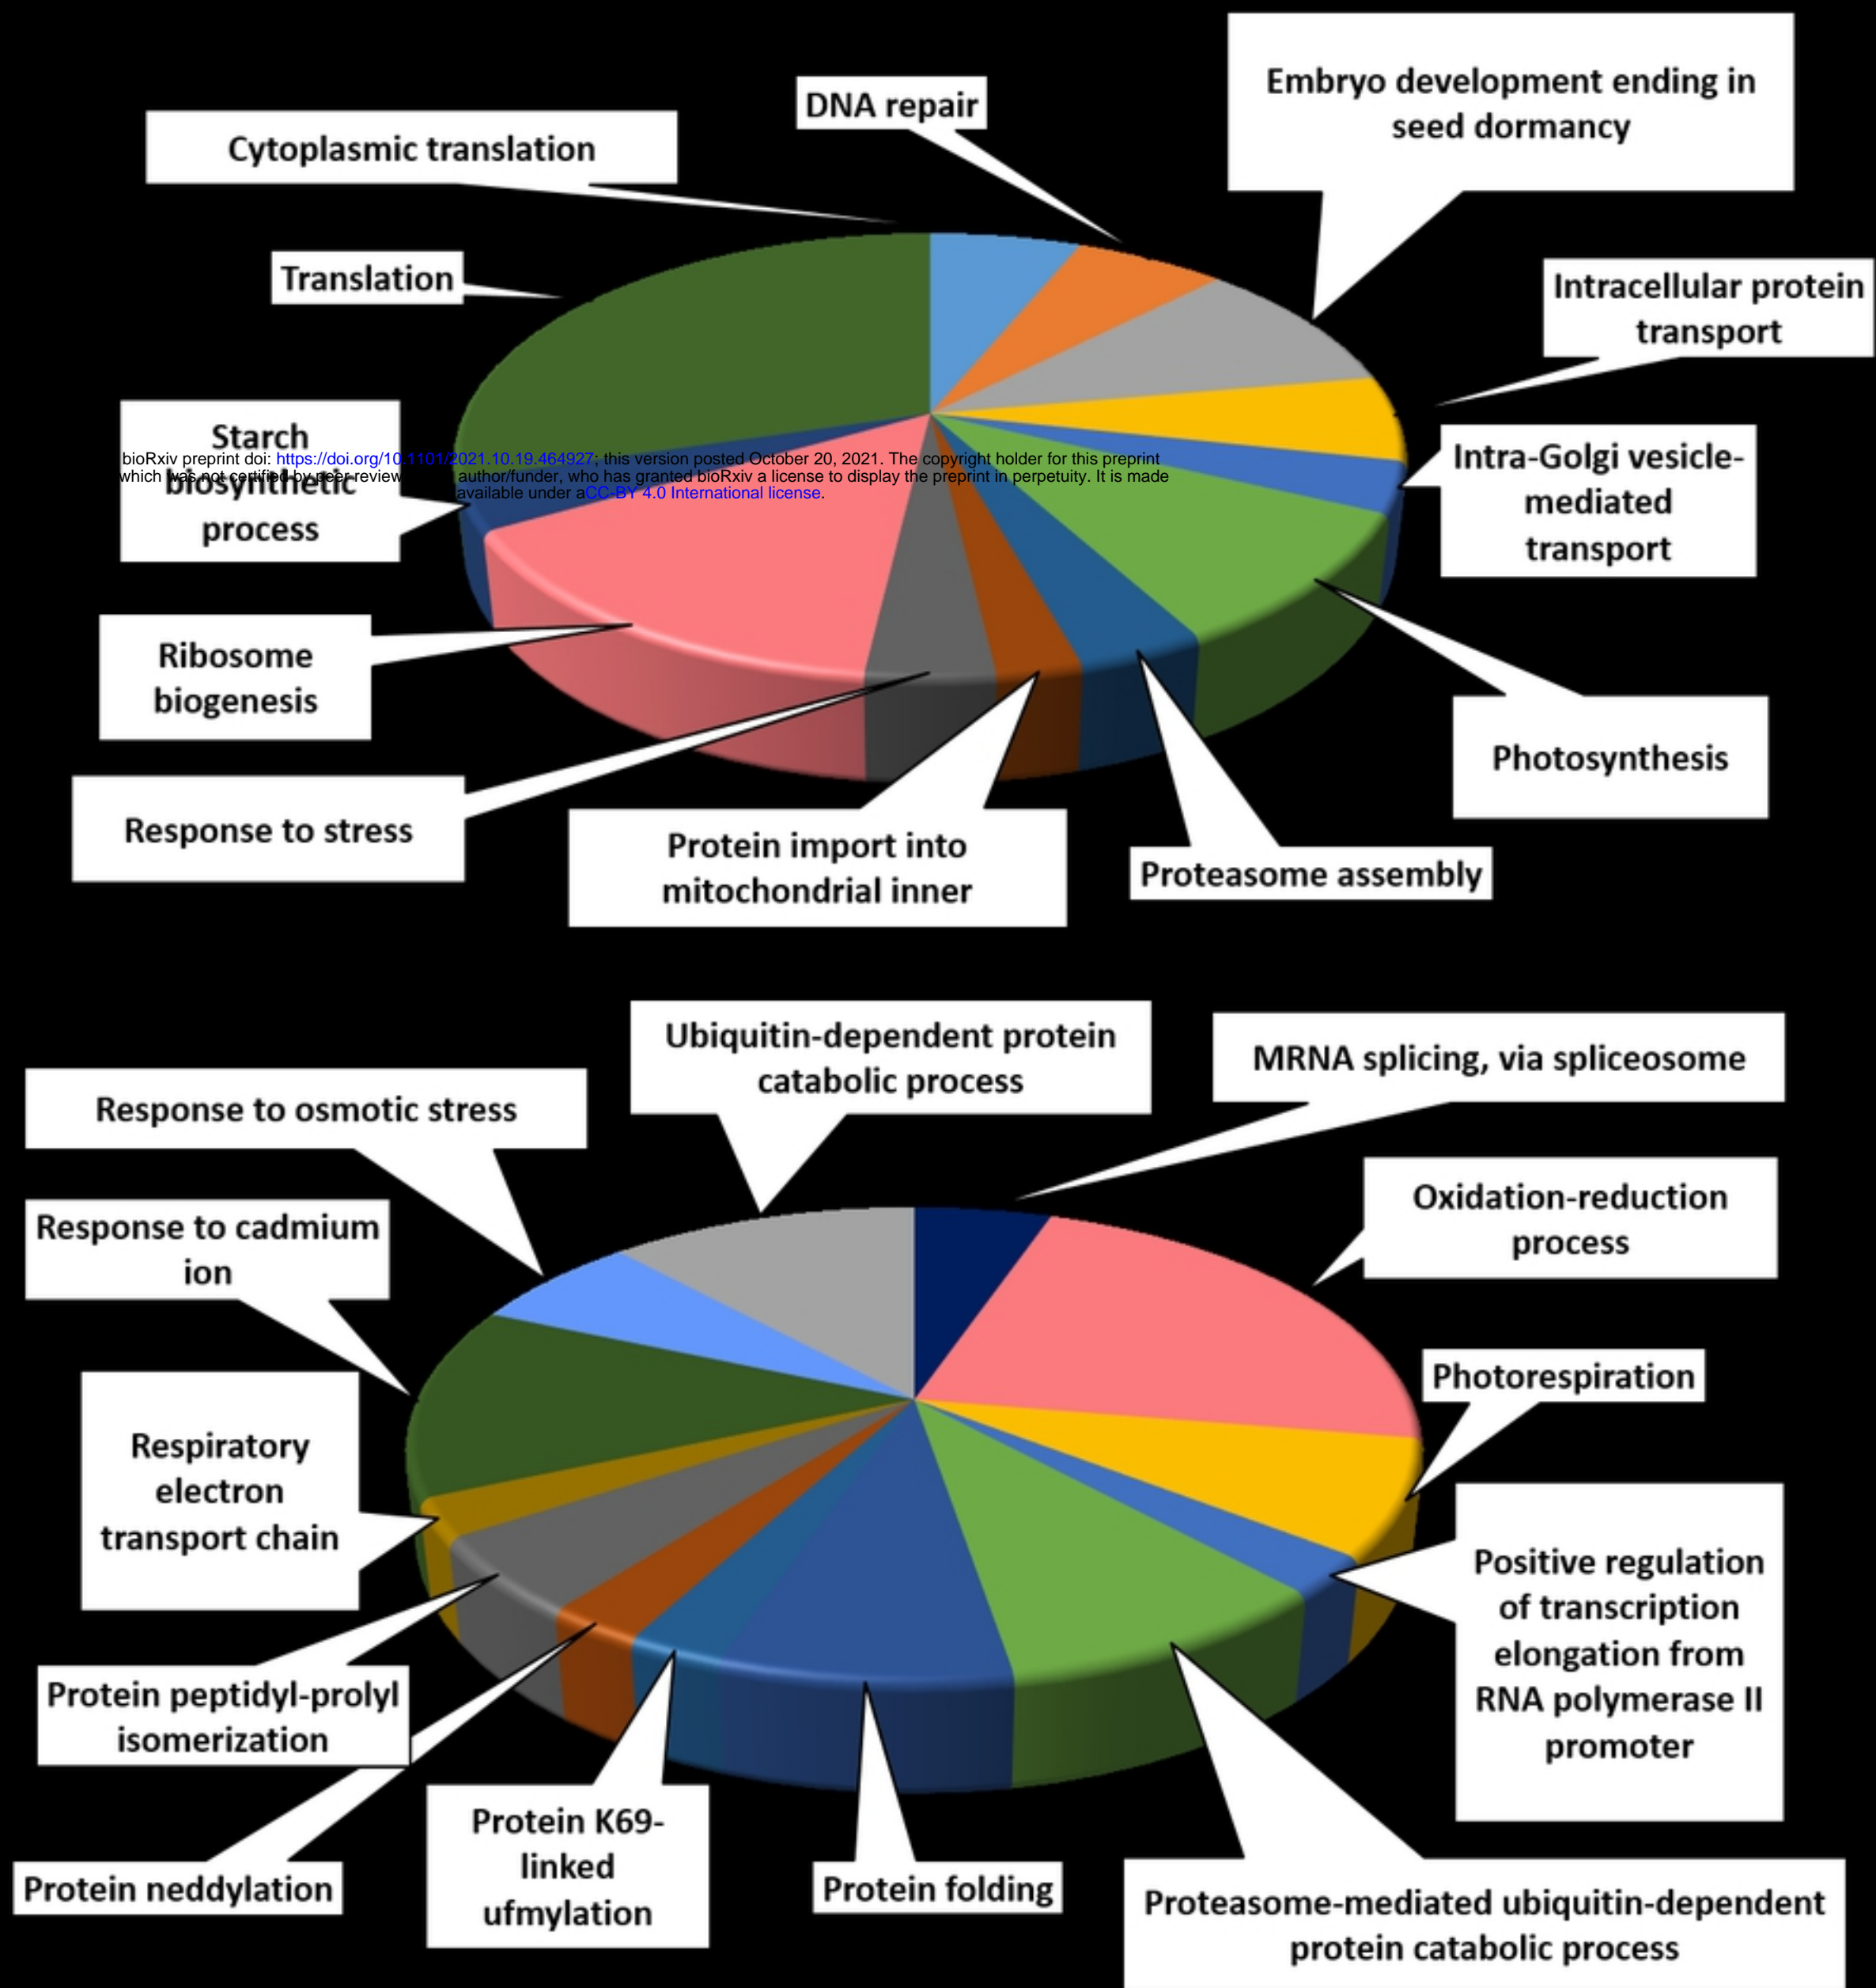

Figure 6

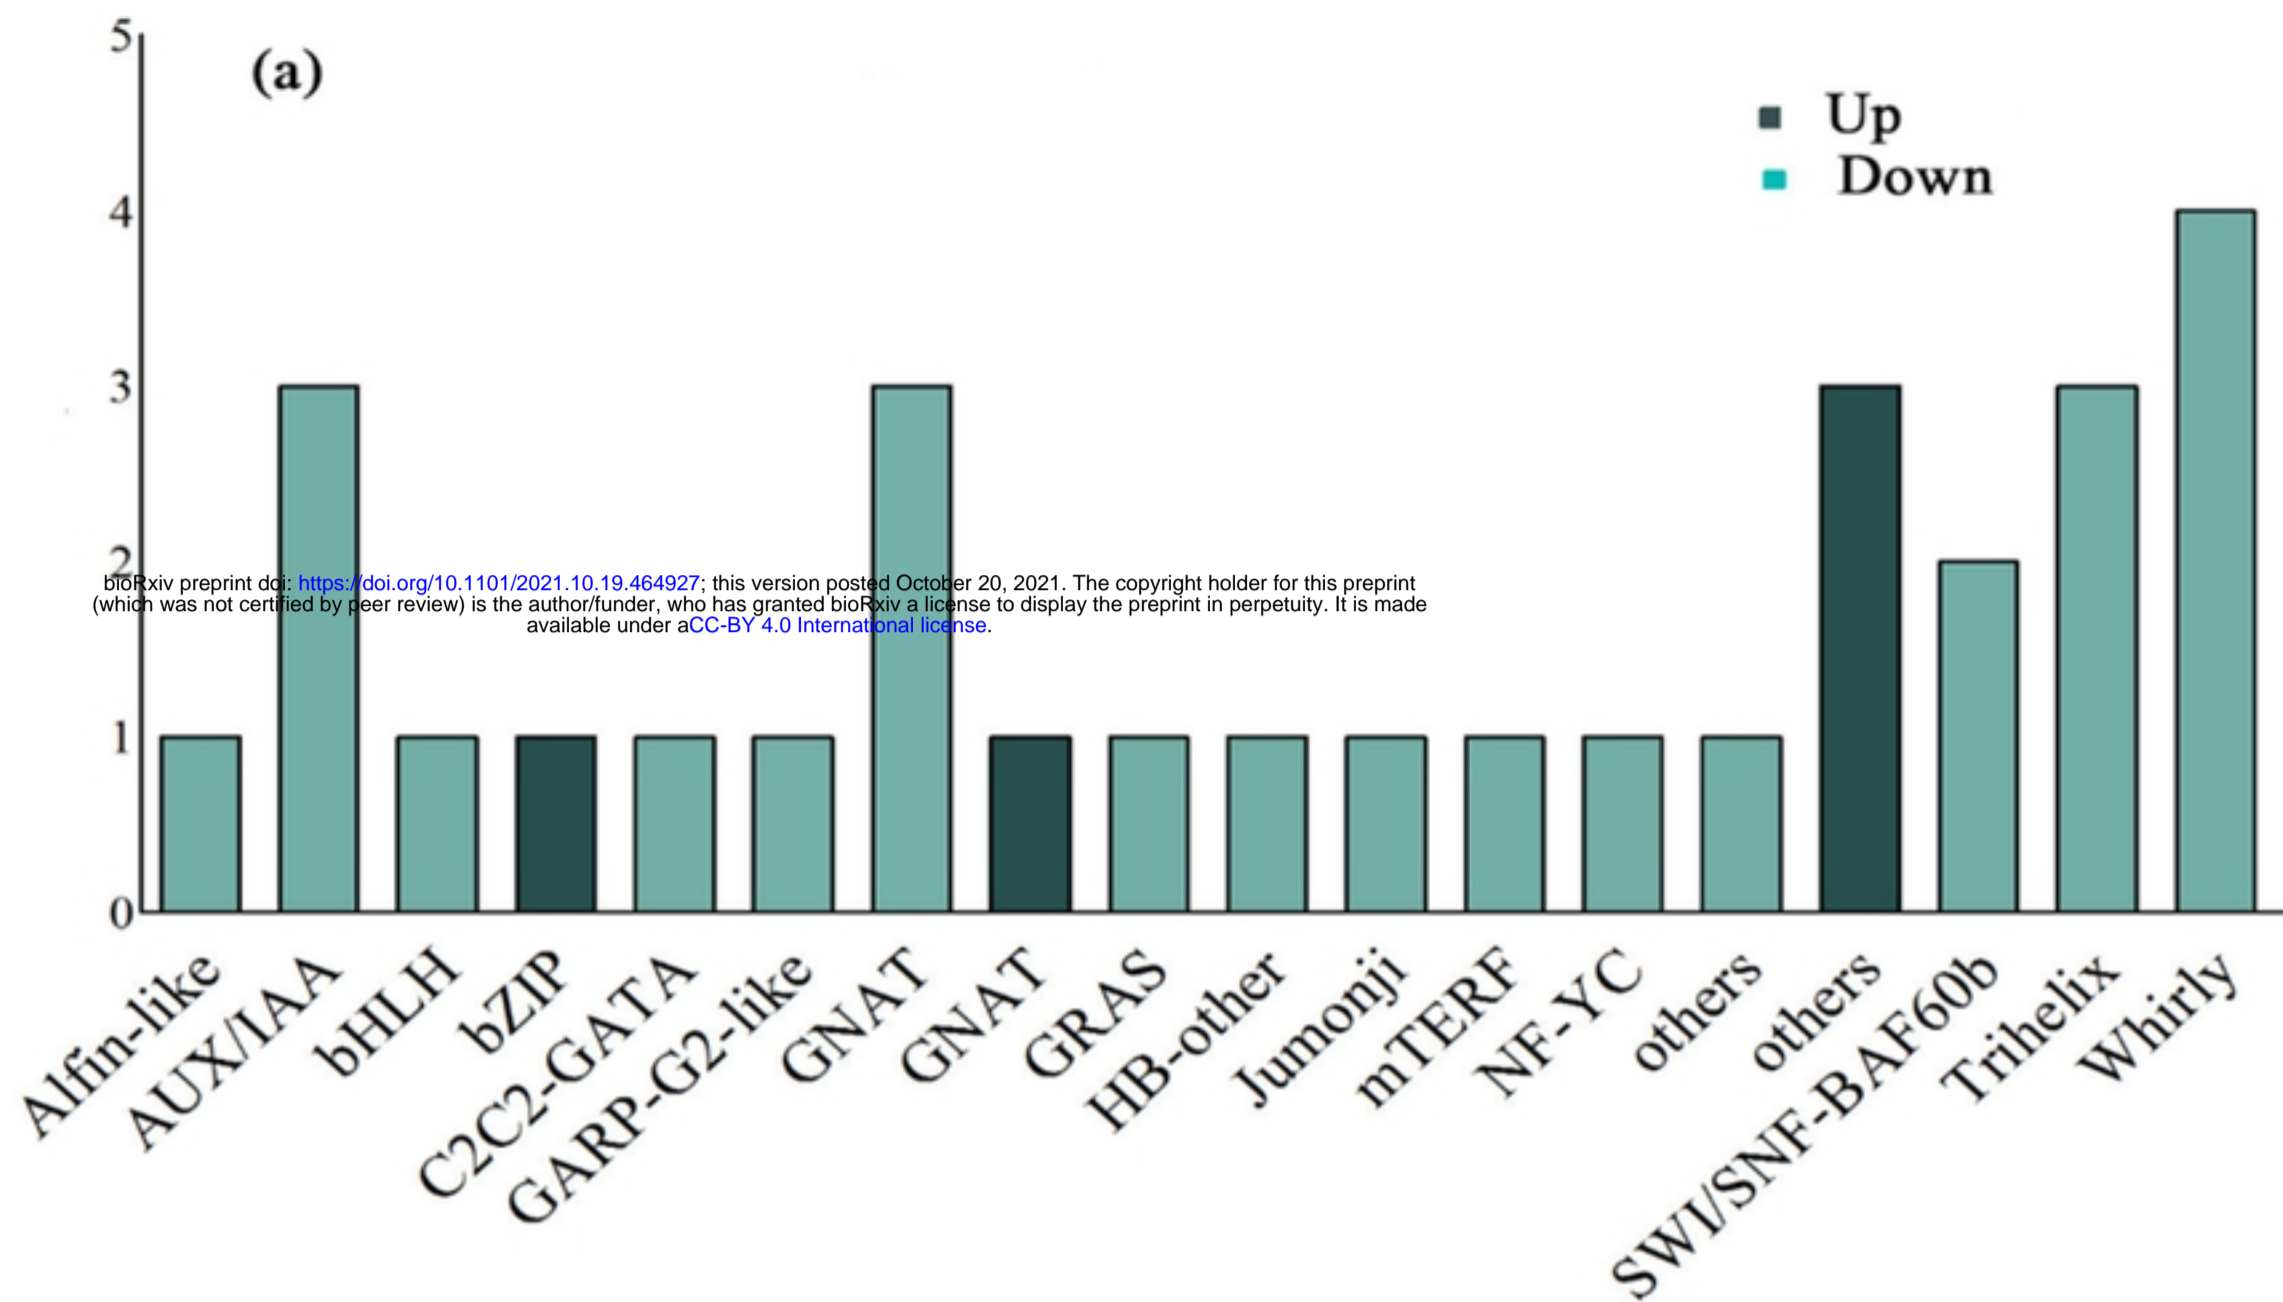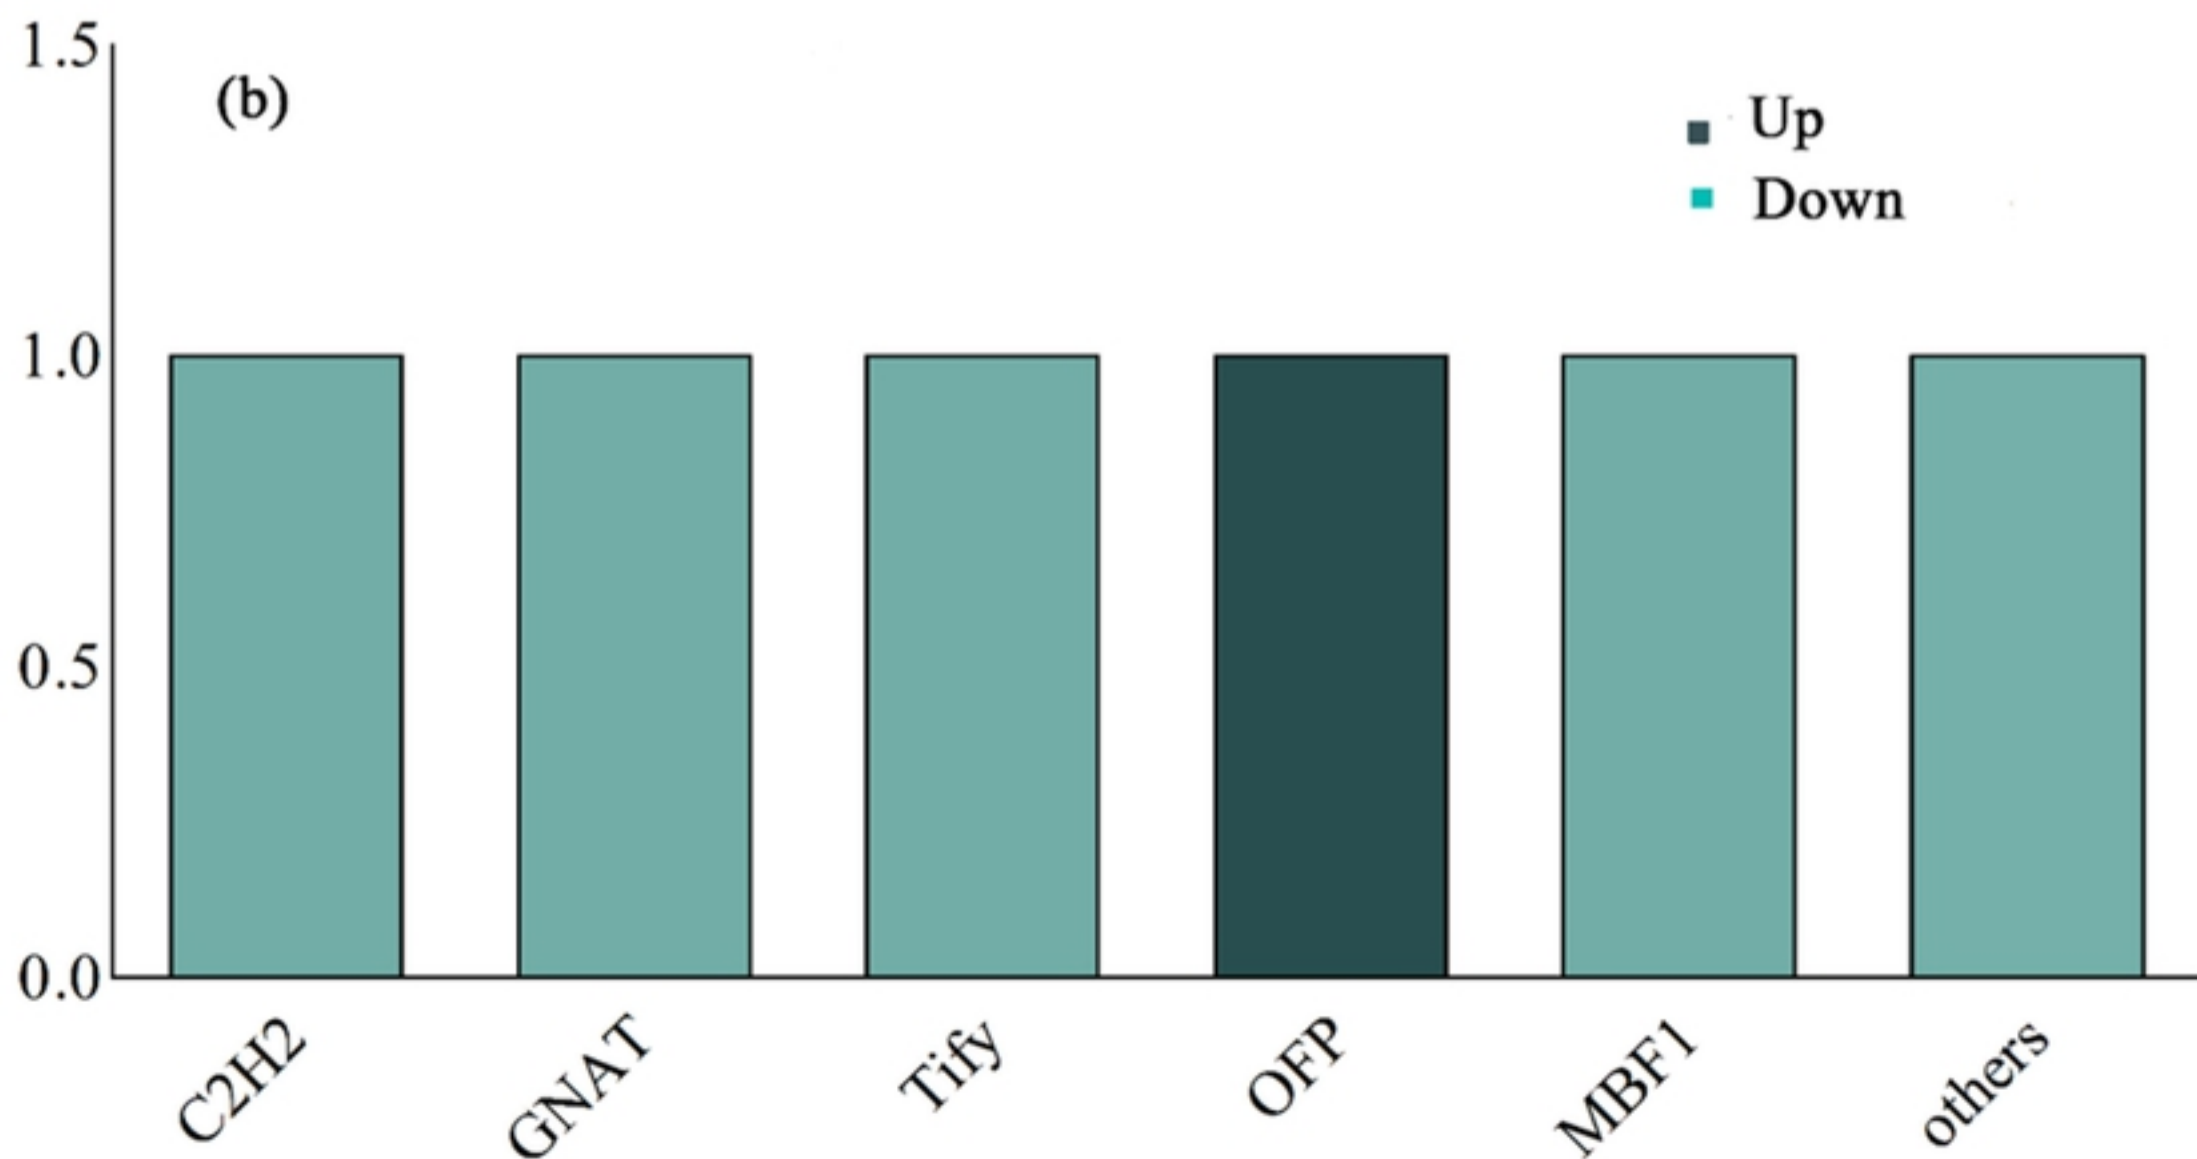

Figure 7

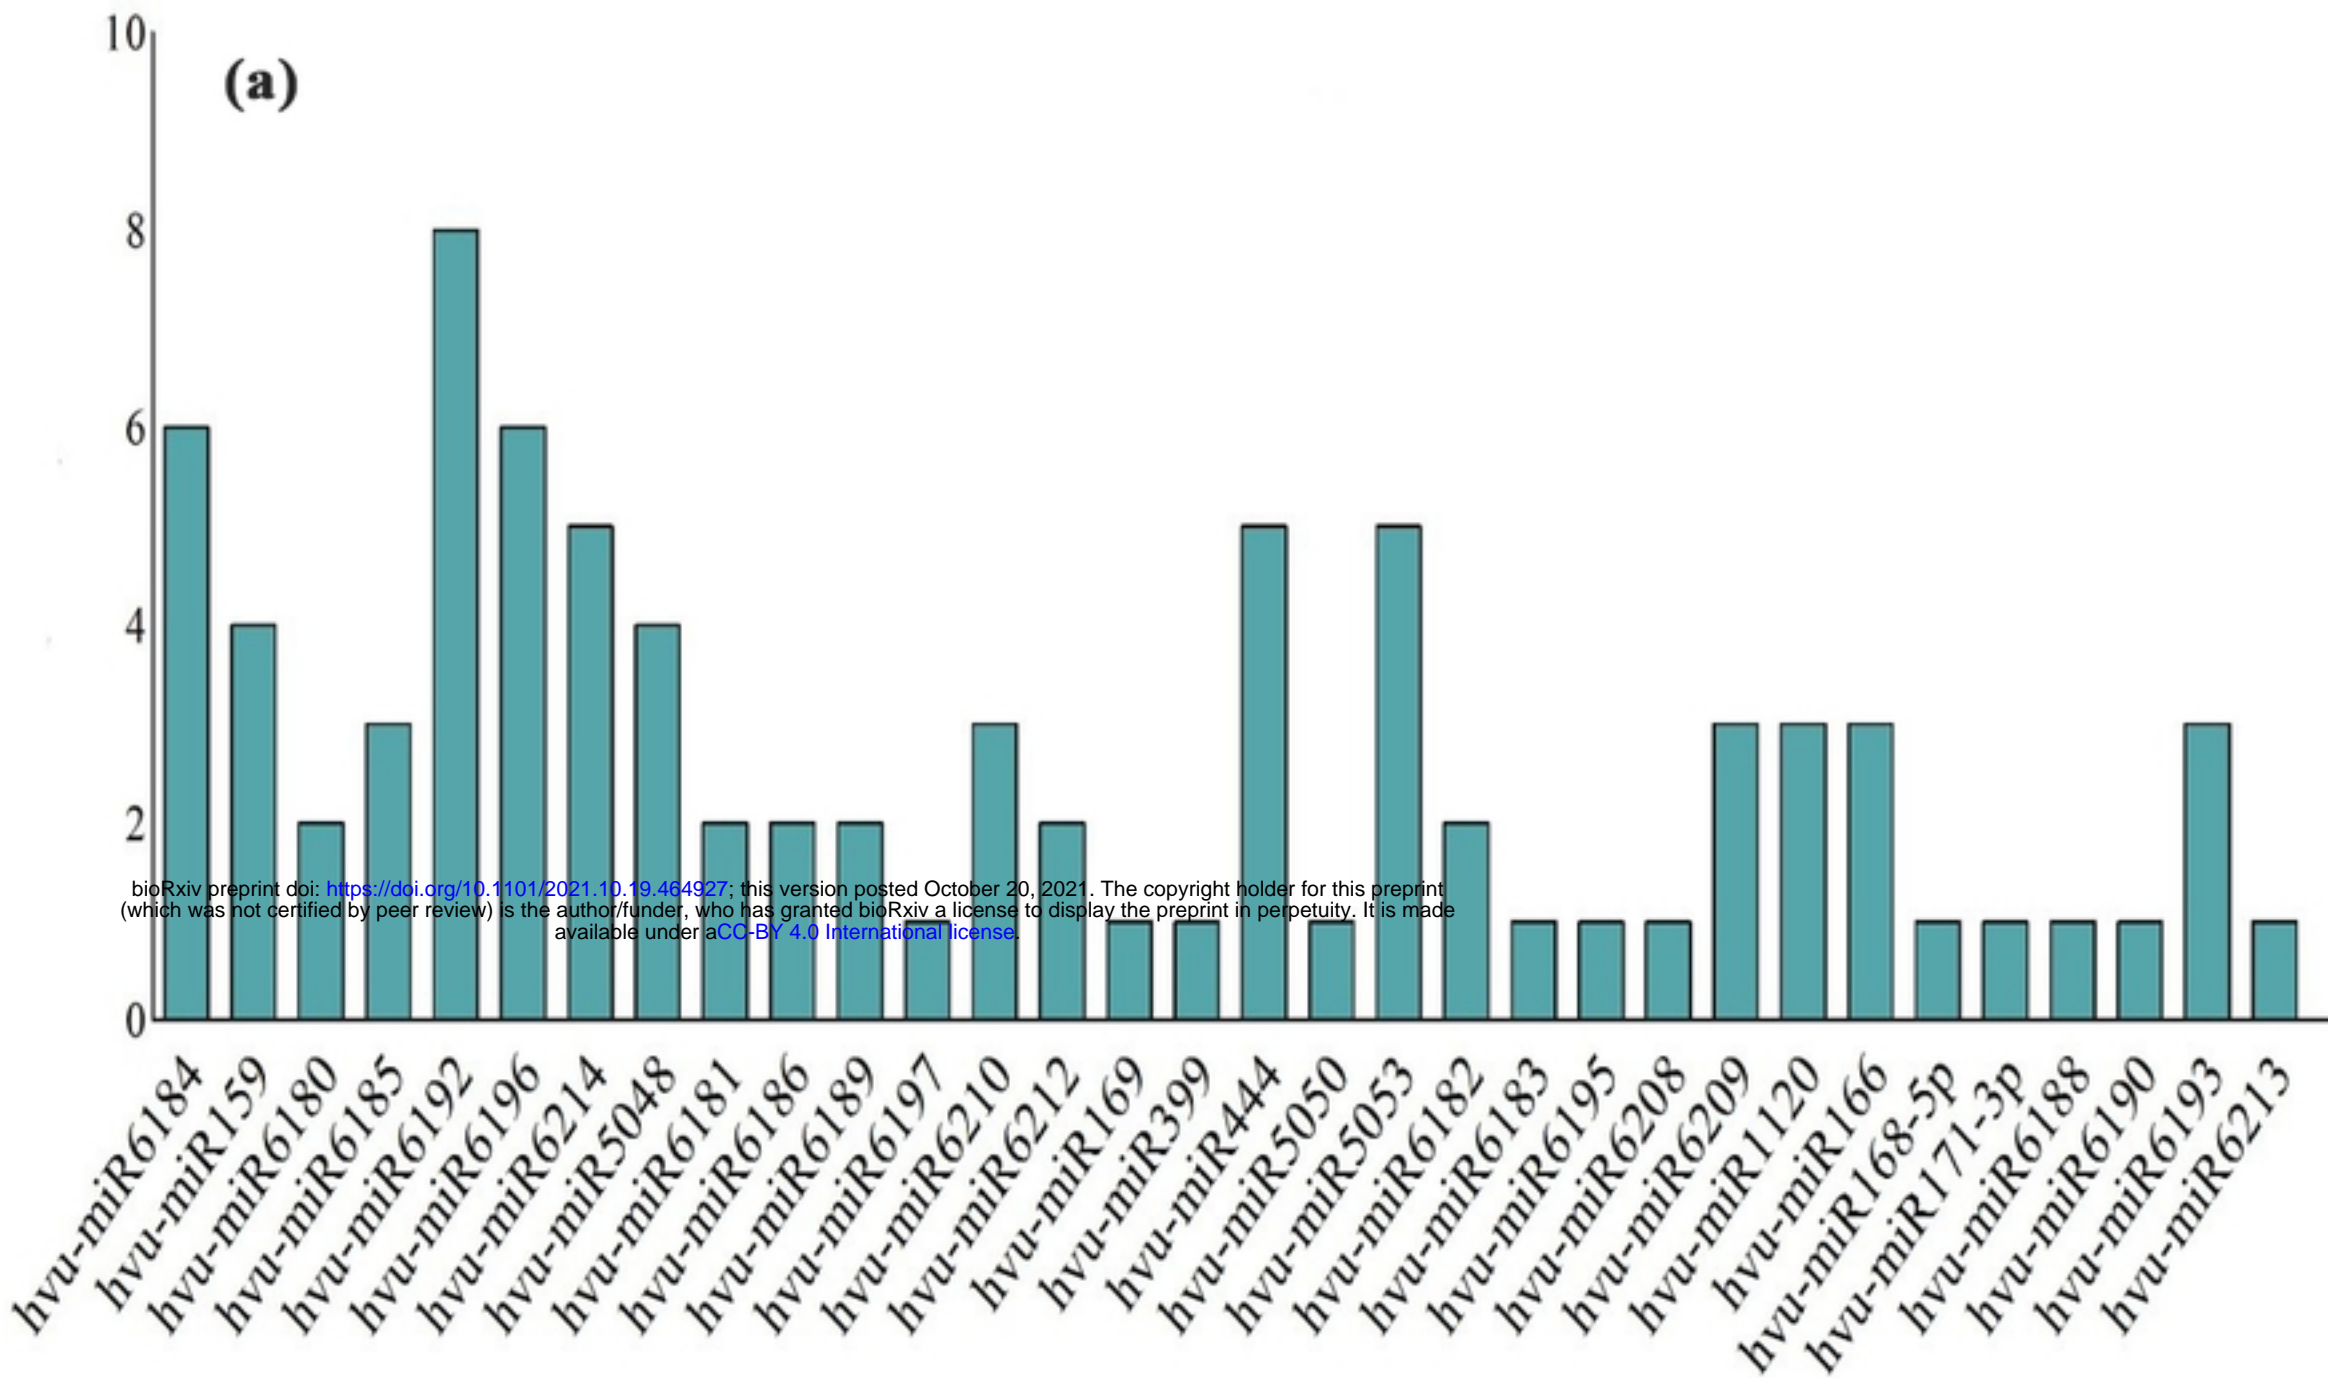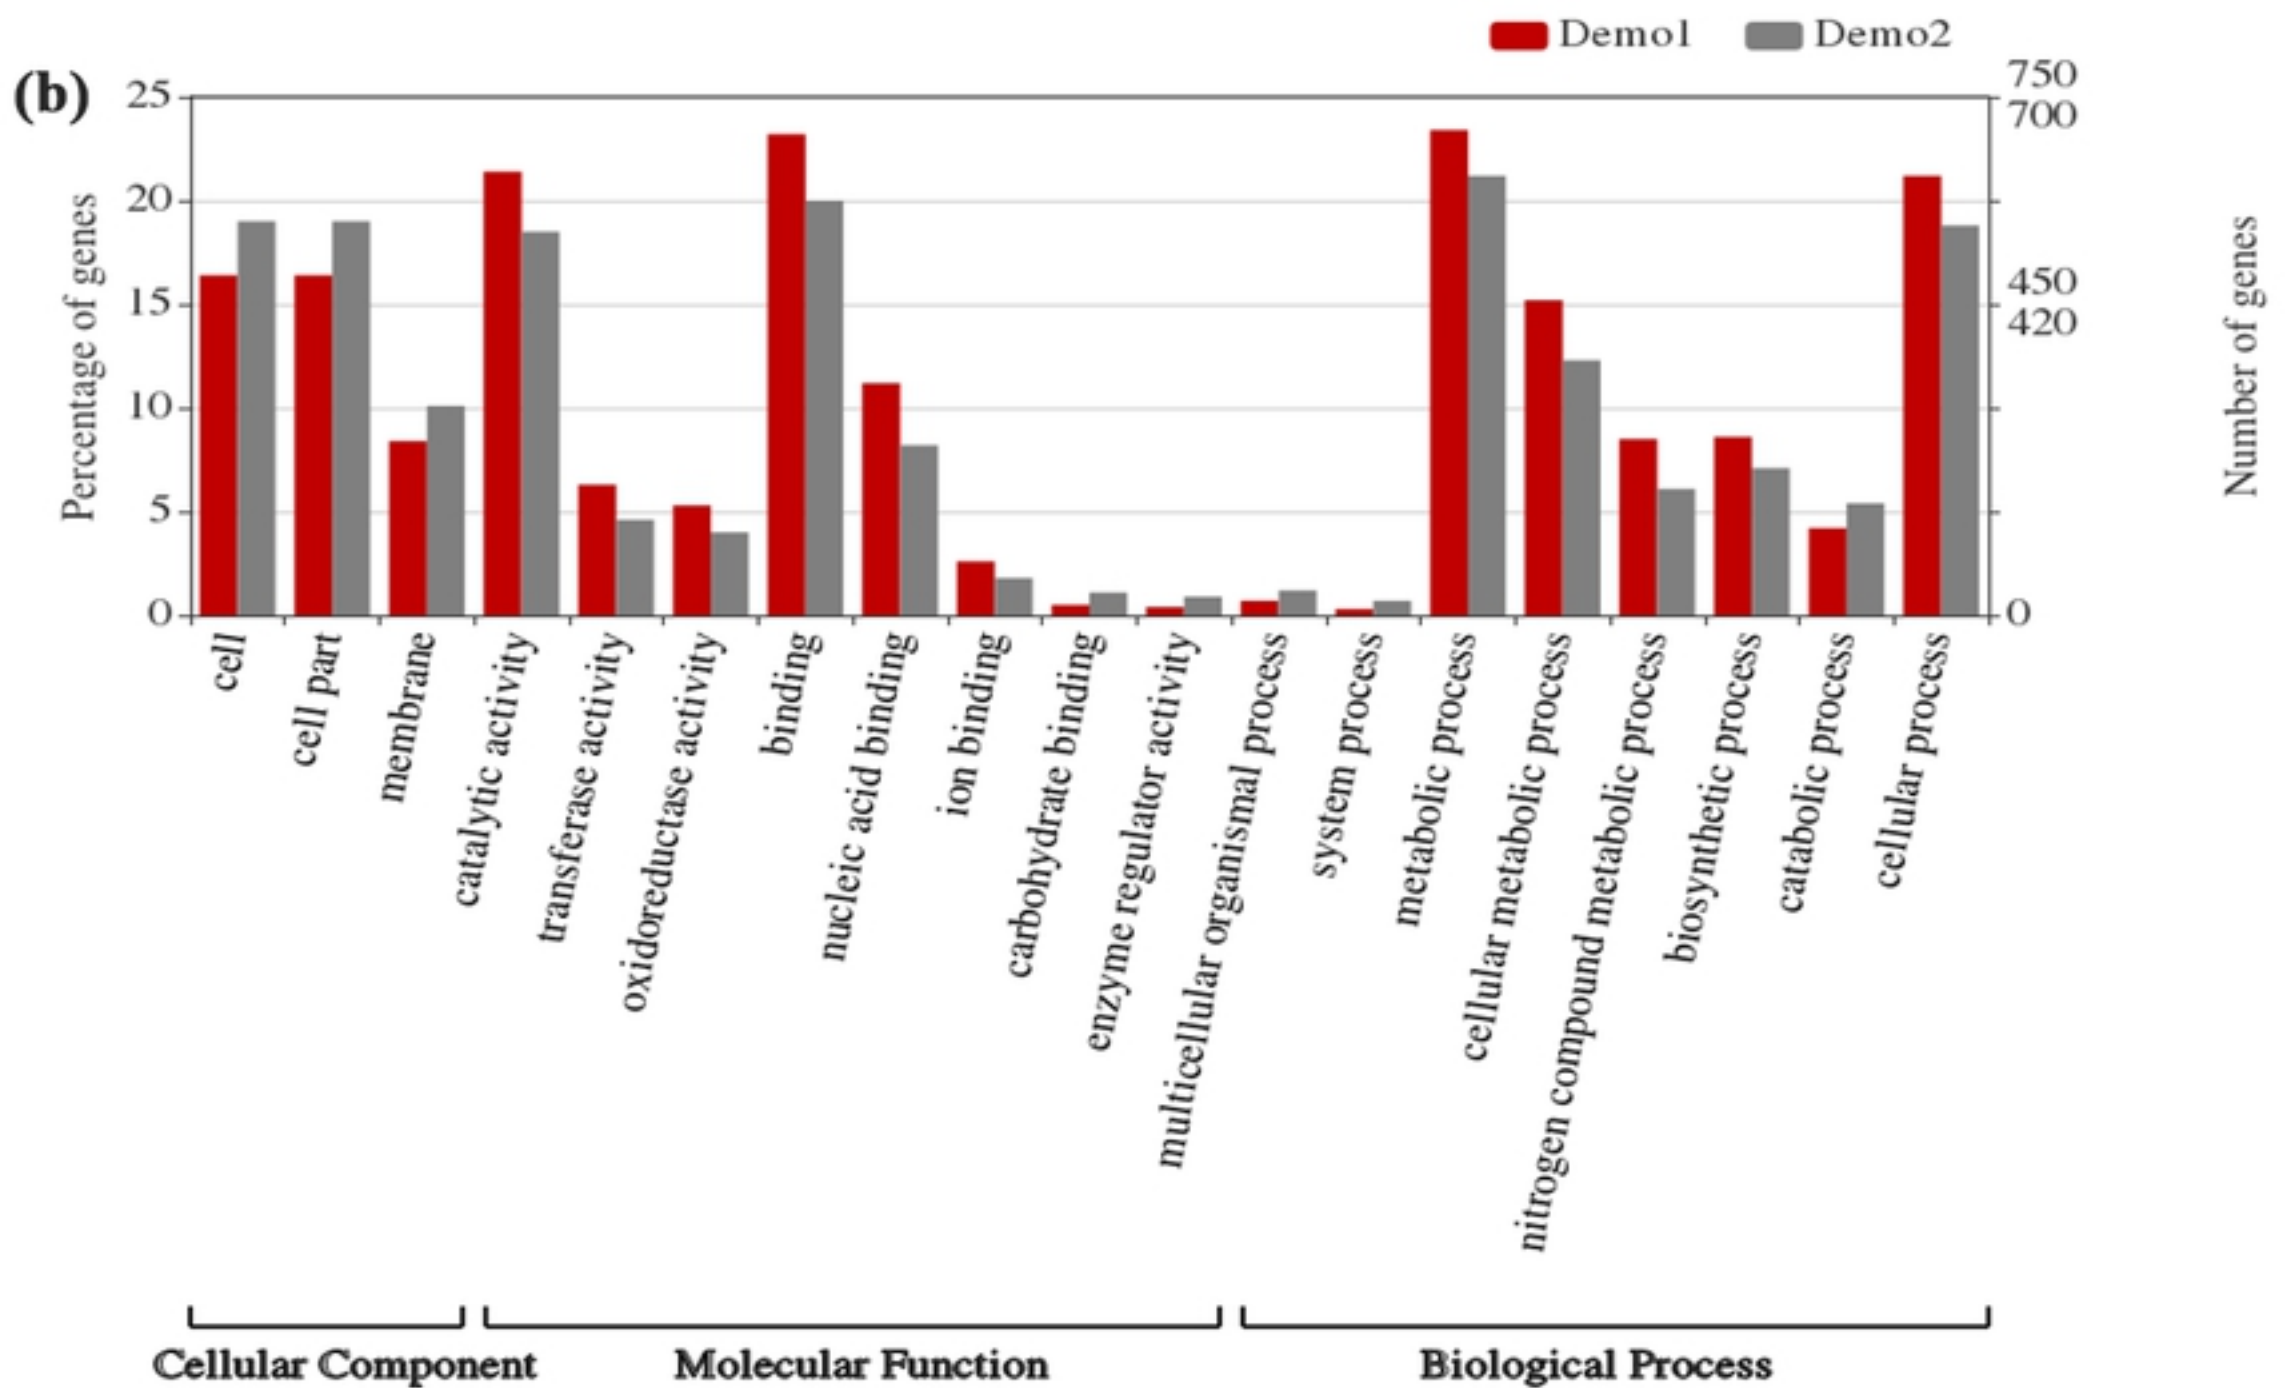

Figure 8

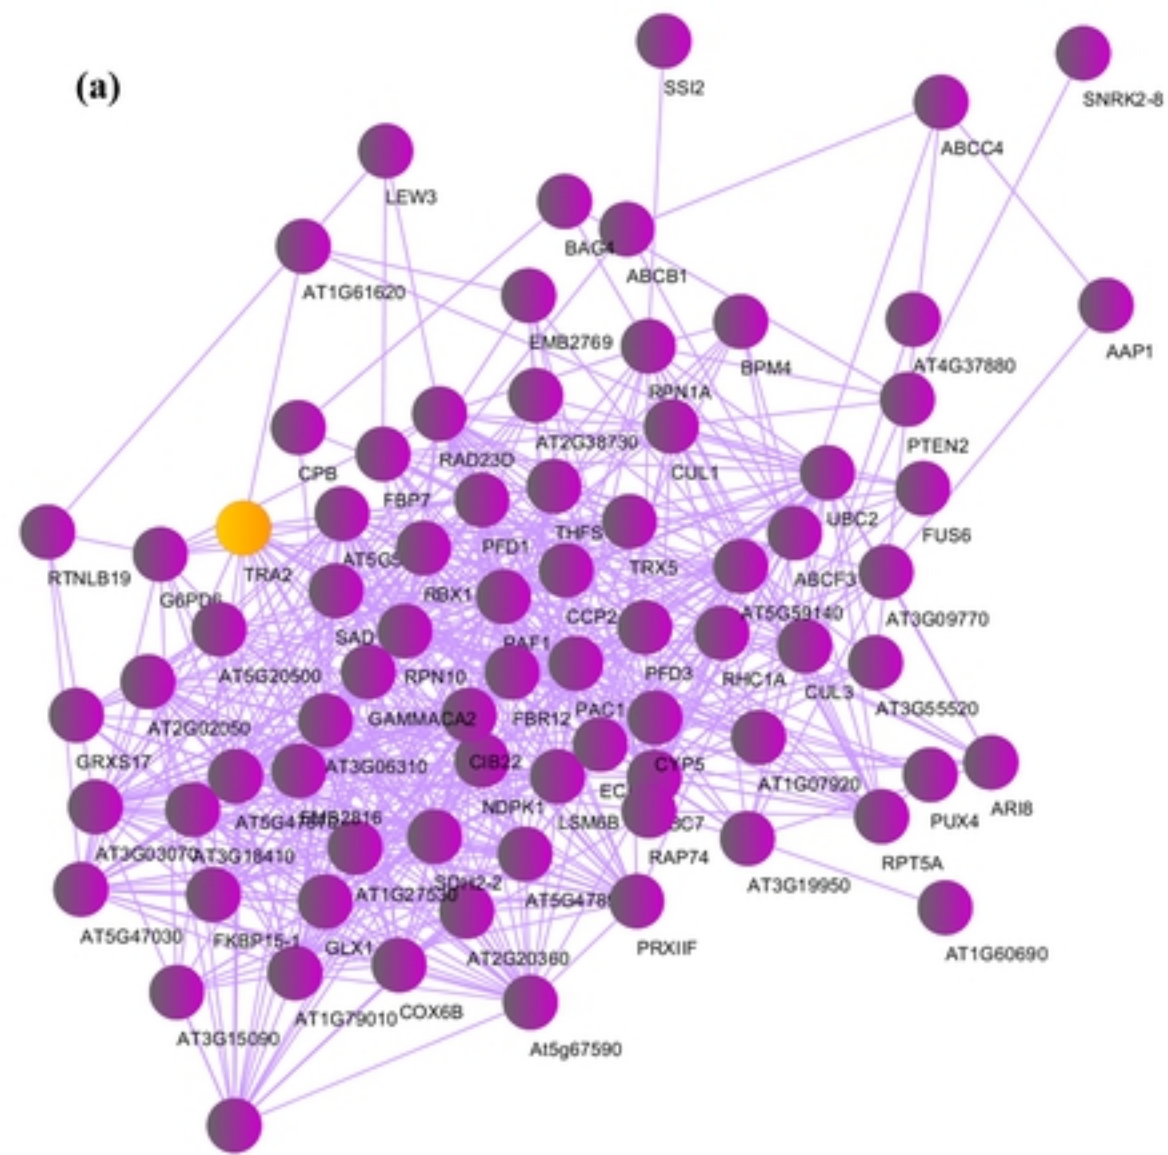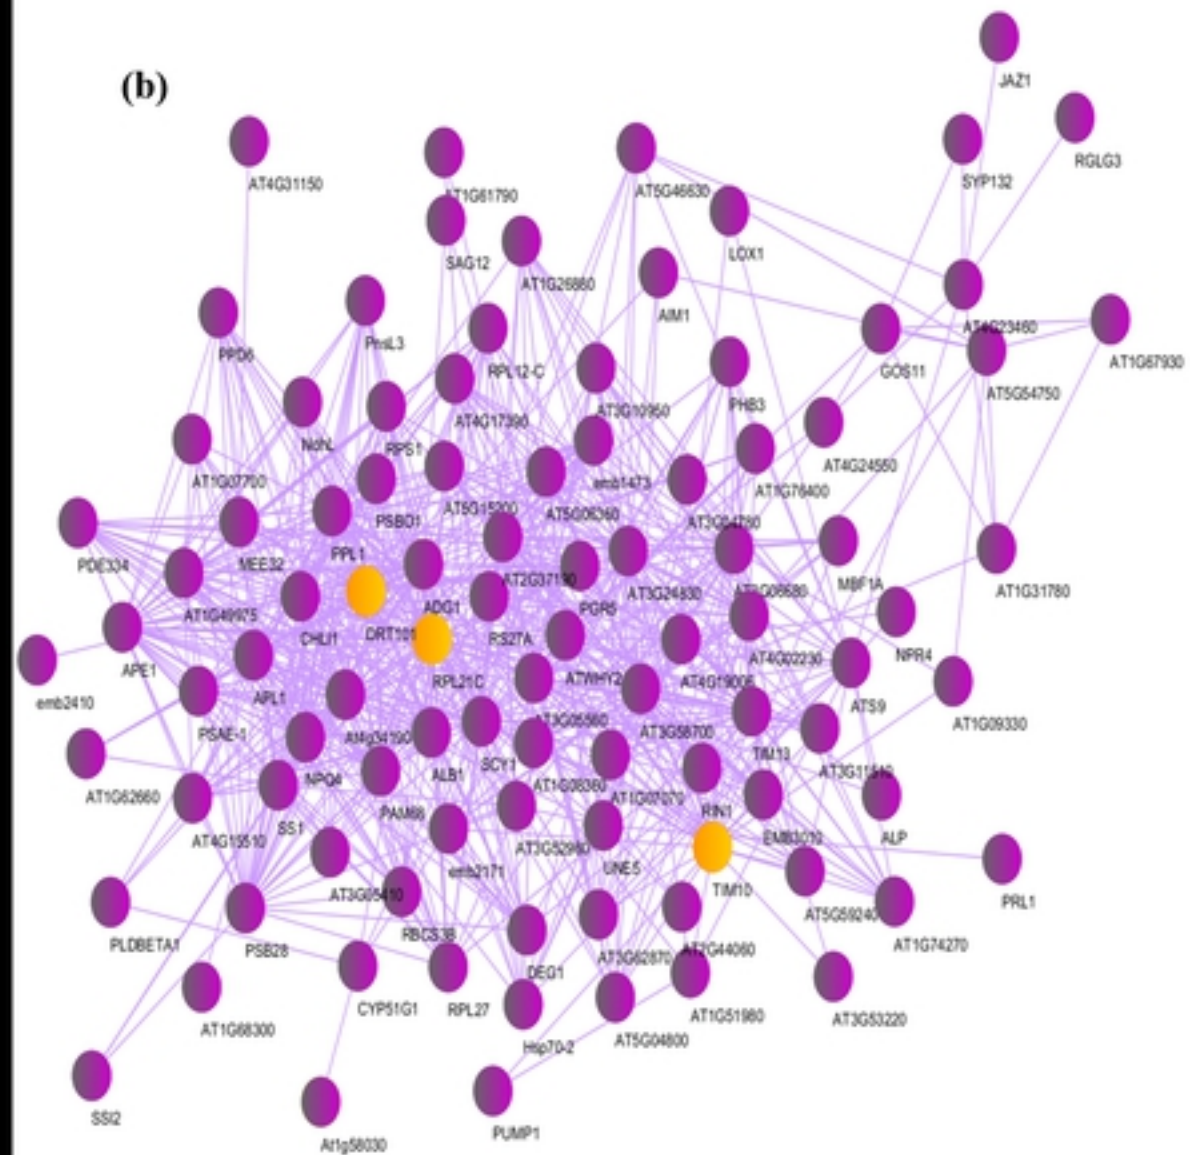

Figure 9

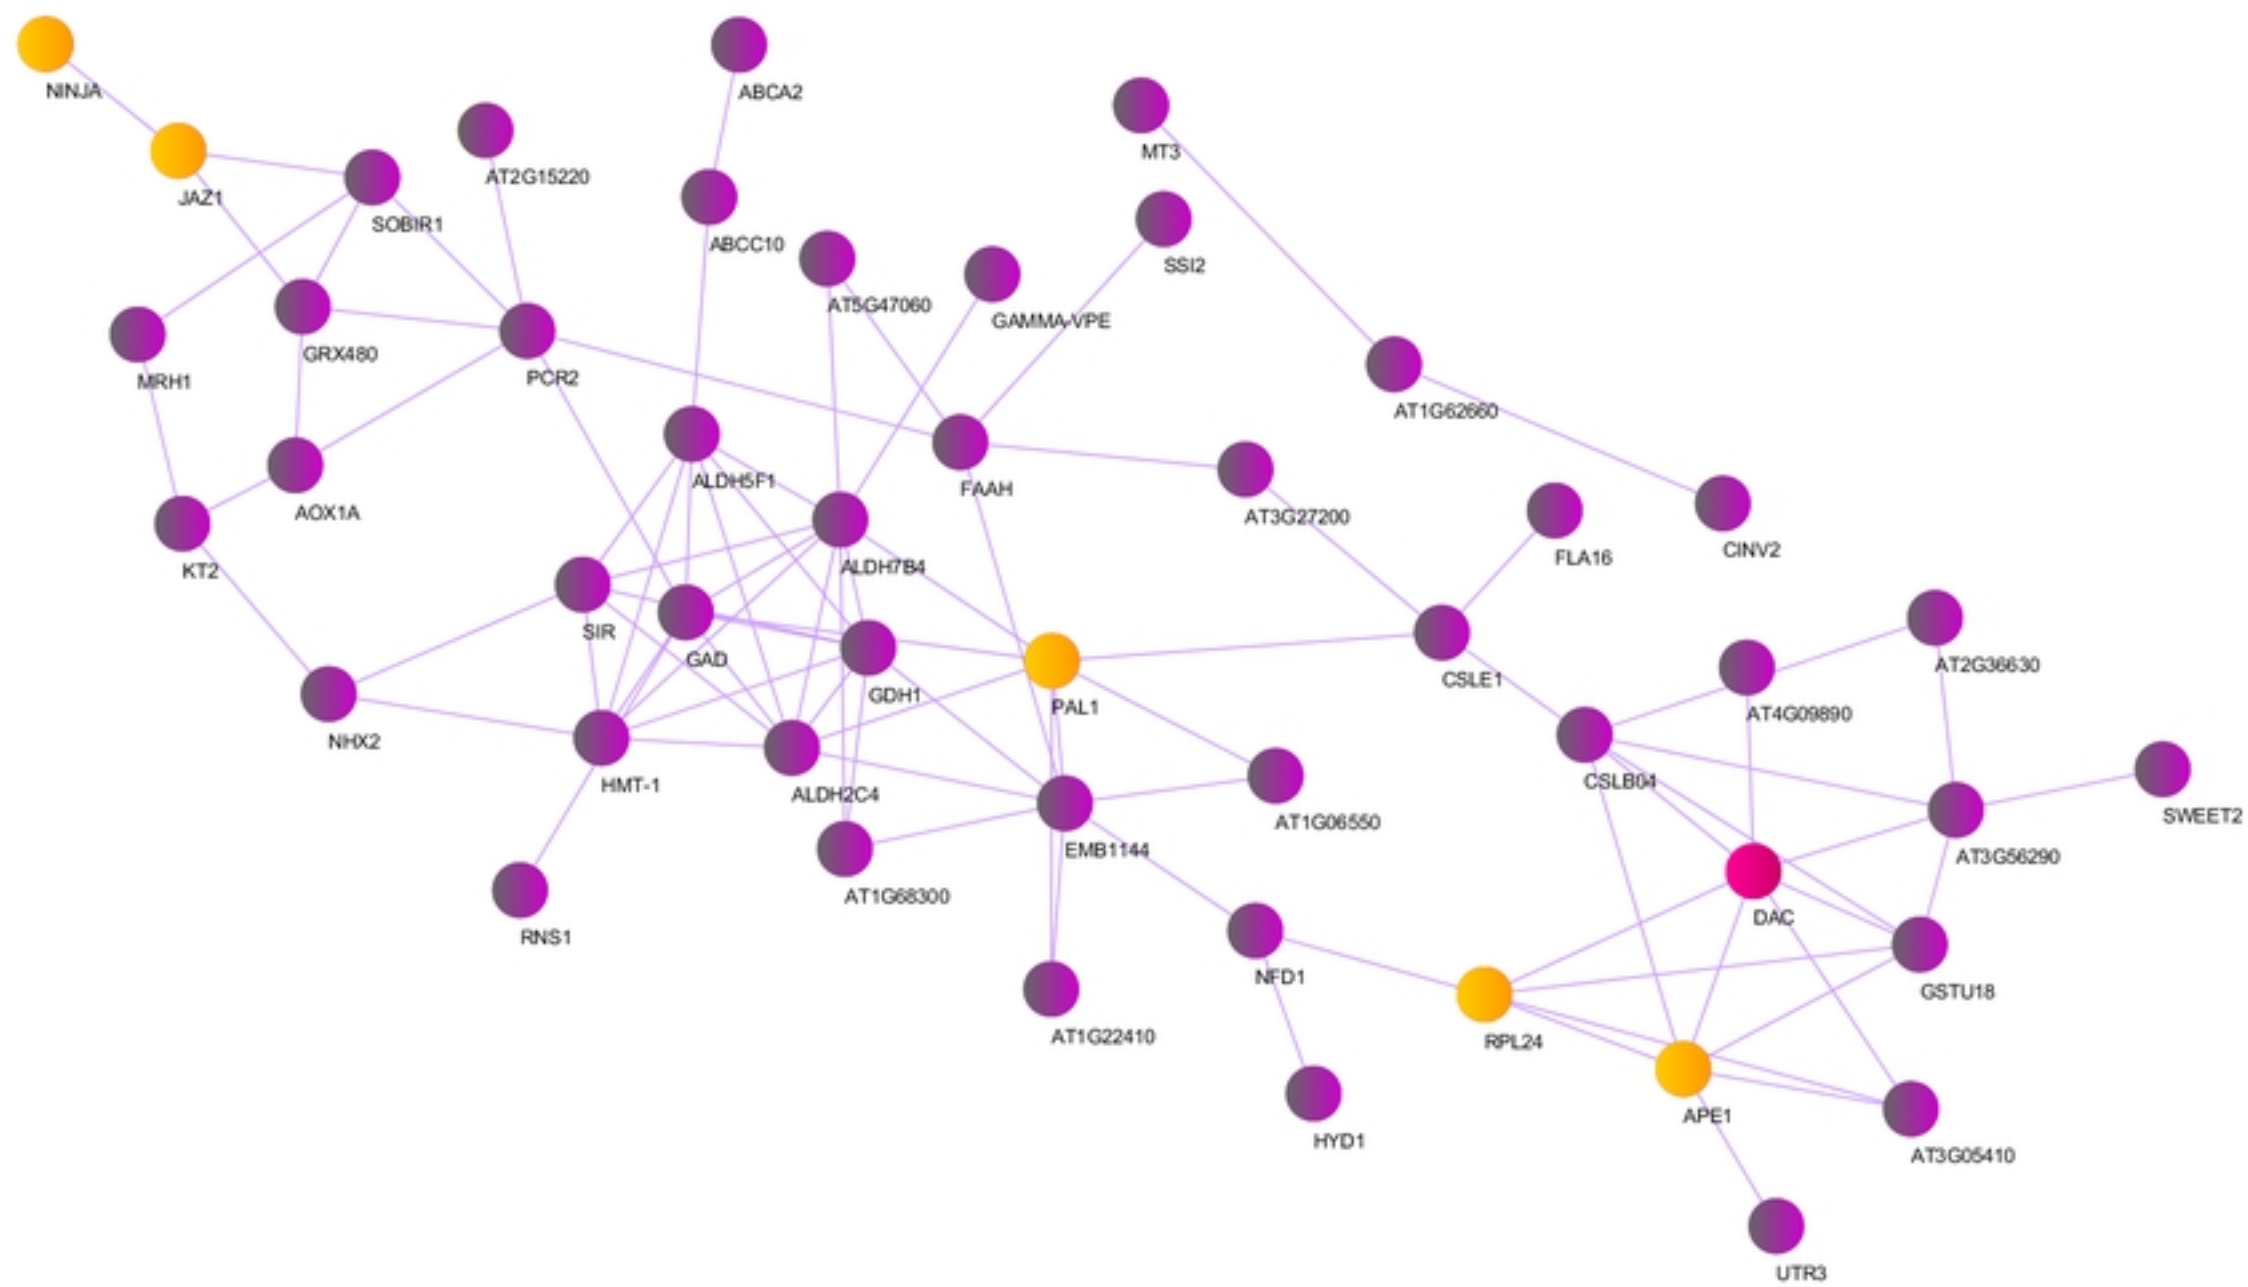

Figure 10
